# Supplementary material for: Uveal Melanoma Patients Have a Distinct Metabolic Phenotype in Peripheral Blood
Source: Int J Mol Sci. 2023 Mar 7;24(6):5077. doi: 10.3390/ijms24065077 (PMC10049075; doi:10.3390/ijms24065077)
Supplement: Supplementary file 1 [file ijms-24-05077-s001.zip › Table S3. Differentially abundant metabolites and features from t-test tumor vs control.xlsx]

## Sheet: Annotated metabolites
P-values and Fold change of metabolite abundancy from the t-test between tumor vs. Control
Symbol	ID	Expr p-value	Expr Fold Change
(E)-glutaconic acid	HMDB01657	9,48E-01	1,004
1-aminocyclopropane-1-carboxylic acid	HMDB36458	7,98E-01	-1,004
1-methyladenosine	HMDB03331	3,50E-02	-1,010
2,3-dihydroxybenzoic acid	HMDB00397	2,24E-09	-1,152
2,5-furandicarboxylic acid	HMDB04812	6,39E-01	-1,004
2-aminoadipic acid	HMDB00510	6,01E-04	-1,026
2-hydroxybutyric acid	HMDB00008	4,34E-04	1,094
2-methylbutyroylcarnitine	HMDB01963	1,80E-07	-1,044
2-methylcitric acid	HMDB03610	5,33E-01	-1,026
2-methylmalonoyl carnitine	HMDB13133	7,23E-02	-1,035
2-octenoylcarnitine	HMDB13324	4,19E-02	-1,019
2-oxoarginine	HMDB06815	1,84E-05	-1,112
3, 5-tetradecadiencarnitine	HMDB13331	5,23E-01	1,008
3-hydroxy-cis-5-tetradecenoylcarnitine	HMDB13330	1,84E-01	-1,015
3-hydroxyanthranilic acid	HMDB01476	6,17E-01	-1,013
3-hydroxydodecanoylcarnitine	HMDB61638	3,29E-03	-1,040
3-hydroxyglutaric acid	HMDB00428	9,64E-01	-1,004
3-hydroxysebacic acid	HMDB02534	9,69E-02	-1,000
3-methylbutyrylcarnitine	HMDB00688	1,05E-05	-1,042
3-methylglutarylcarnitine	HMDB00552	1,65E-01	-1,051
3alpha,7alpha-dihydroxy-5beta-cholestanic acid	HMDB01974	1,58E-04	-1,040
4-guanidinobutanoic acid	HMDB05991	1,59E-01	-1,010
4-hydroxy-3-methoxyphenylacetic acid	HMDB04285	6,77E-01	1,032
4-hydroxy-3-methoxyphenyllactic acid	HMDB00913	1,75E-01	-1,079
4-hydroxyphenylpyruvic acid	HMDB00707	8,67E-01	-1,011
5'-methylthioadenosine	HMDB01173	1,40E-02	-1,031
5,6-dihydrothymine	HMDB00079	8,72E-02	-1,009
5-hydroxy-L-tryptophan	HMDB15571	3,11E-06	-1,054
5-hydroxyindol-3-acetic acid	HMDB00763	7,46E-04	-1,067
5-methylcytosine	HMDB02894	1,67E-01	-1,010
6-sulphatoxymelatonin	HMDB41815	7,64E-02	-1,167
9-decenoylcarnitine	HMDB13205	2,58E-01	-1,017
aceturic acid	HMDB00532	3,25E-04	1,046
acetyl-L-carnitine	HMDB00515	6,53E-01	1,006
adenine	HMDB00034	1,69E-02	-1,012
allantoin	HMDB00462	2,06E-01	-1,042
alpha-ketoisocaproic acid	HMDB00762	2,49E-02	-1,006
anserine	HMDB00194	7,48E-05	0,000
beta-methylcrotonylglycine	HMDB00459	3,21E-02	-1,060
betaine	HMDB00043	2,91E-02	-1,008
bilirubin	HMDB00054	6,27E-03	-1,056
biliverdine	HMDB02309	3,35E-02	1,042
caffeic acid	HMDB01964	8,40E-03	-1,052
chenodeoxycholic acid	HMDB00518	3,66E-07	-1,283
cholesterol	HMDB62453	7,68E-06	-1,021
cholesterol glucuronide	HMDB10330	3,29E-01	-1,022
cholic acid	HMDB00619	4,32E-04	-1,312
choline	HMDB00097	9,49E-01	-1,001
citramalate	HMDB00426	7,11E-01	1,012
citric acid	HMDB00094	5,76E-01	-1,002
citrulline	HMDB00904	4,14E-01	-1,003
creatine	HMDB00064	6,76E-01	-1,005
creatinine	HMDB00562	1,68E-02	-1,007
cyclic AMP	HMDB00058	1,54E-01
cysteinylglycine	HMDB28775	3,47E-01	1,051
cytidine	HMDB00089	2,99E-03	-1,093
D-aspartic acid	HMDB06483	3,82E-03	-1,048
D-gluconic acid	HMDB0000625	4,55E-02	-1,016
D-glutamic acid	HMDB03339	7,01E-01	-1,022
D-pantothenic acid	HMDB62717	1,27E-02	1,012
D-ribose-5-phosphate	HMDB01548	2,60E-01	-1,111
D-tartaric acid	HMDB29878	1,21E-03	-1,043
decanoylcarnitine	HMDB00651	1,30E-01	-1,028
dehydroepiandrosterone sulfate	HMDB01032	8,34E-04	1,049
deoxyuridine	HMDB00012	4,33E-01	1,004
diethanolamine	HMDB04437	2,62E-03	-1,030
erythritol	HMDB02994	3,60E-03	-1,123
erythronic acid	HMDB00613	1,96E-01	-1,008
ethylmalonic acid	HMDB00622	2,17E-01	-1,018
formiminoglutamic acid	HMDB00854	4,93E-01	-1,011
fumaric acid	HMDB00134	2,92E-01	-1,012
fumarylacetoacetate	HMDB01428	7,87E-01	-1,001
GABA	HMDB00112	3,59E-01	-1,046
gluconolactone	HMDB00150	1,01E-02	-1,022
glutarylcarnitine	HMDB62587	4,88E-01	-1,010
glycerol	HMDB00131	2,86E-02	1,019
glycine	HMDB00123	2,15E-01	1,004
glycocyamine	HMDB00128	8,36E-02	1,010
glycodeoxycholic acid	HMDB04012	3,28E-09	-1,142
guanidinosuccinic acid	HMDB03157	2,06E-01	-1,003
guanine	HMDB00132	5,51E-04	-1,276
guanosine	HMDB00133	3,82E-01	1,075
hexanoylcarnitine	HMDB00705	5,58E-01	-1,004
hippuric acid	HMDB00714	5,43E-03	-1,039
homoarginine	HMDB00670	2,25E-01	1,004
homocitrulline	HMDB00679	8,23E-03	-1,018
hydroxybutyrylcarnitine	HMDB62735	6,89E-01	1,026
hypoxanthine	HMDB00157	9,86E-03	1,021
imidazole-4-acetic acid	HMDB60261	3,64E-01	-1,029
indoleacetic acid	HMDB00197	8,36E-06	-1,051
inosine	HMDB00195	6,02E-01	-1,030
kynurenic acid	HMDB00715	1,28E-03	-1,028
L-4,5-dihydroorotic acid	HMDB03349	5,89E-03	1,104
L-arginine	HMDB00517	3,11E-04	-1,021
L-argininic acid	HMDB03148	2,76E-03	-1,074
L-asparagine	HMDB00168	1,99E-01	-1,001
L-cysteic acid	HMDB02757	3,76E-01	1,019
L-cysteine	HMDB00574	1,41E-01	-1,024
L-cystine	HMDB00192	1,30E-05	-1,047
L-glutamine	HMDB00641	3,38E-01	1,000
L-glyceric acid	HMDB06372	2,05E-01	1,014
L-histidine	HMDB03412	5,45E-01	-1,000
L-homocysteine	HMDB00742	1,98E-01	1,002
L-kynurenine	HMDB00684	3,37E-09	-1,034
L-lactic acid	HMDB62492	4,97E-03	1,018
L-leucine	HMDB00687	4,89E-02	-1,003
L-lysine	HMDB00182	3,79E-01	-1,001
L-methionine	HMDB00696	8,82E-03	-1,019
L-octanoylcarnitine	HMDB00834	3,63E-01	-1,014
L-ornithine	HMDB04984	6,78E-01	1,000
L-phenylalanine	HMDB00612	1,50E-04	-1,011
L-proline	HMDB00162	1,73E-04	-1,019
L-serine	HMDB00589	2,09E-01	1,010
L-tryptophan	HMDB00929	3,58E-04	-1,013
L-tyrosine	HMDB00647	1,31E-06	-1,022
L-valine	HMDB34366	4,88E-03	-1,008
lauroylcarnitine	HMDB62713	5,56E-03	-1,044
linoleoylcarnitine	HMDB13212	1,31E-01	1,019
malic acid	HMDB00744	7,97E-01	1,005
malonic acid	HMDB00691	8,82E-01	1,004
malonylcarnitine	HMDB02095	3,60E-02	-1,021
methionine sulfoxide	HMDB02005	7,34E-01	-1,016
methylmalonic acid	HMDB00202	9,23E-01	-1,003
N(1)-methylnicotinamide	HMDB00699	6,32E-02	1,051
N(2),N(2)-dimethylguanosine	HMDB04824	8,28E-02	-1,017
N-(L-arginino)succinic acid	HMDB01006	2,72E-04	-1,161
N-acetyl-(L)-asparagine	HMDB06028	1,35E-02	-1,012
N-acetyl-Asp-Glu	HMDB01067	2,09E-01	1,004
N-acetyl-L-alanine	HMDB00766	2,70E-03	-1,016
N-acetyl-L-arginine	HMDB04620	2,35E-03	-1,046
N-acetyl-L-aspartic acid	HMDB00812	5,83E-02	-1,012
N-acetyl-L-glutamate	HMDB01138	1,60E-04	-1,069
N-acetyl-L-methionine	HMDB11745	1,54E-03	-1,060
N-acetyl-L-phenylalanine	HMDB00512	1,54E-03	-1,090
N-acetyl-L-tyrosine	HMDB00866	1,69E-03	-1,030
N-acetylcarnosine	HMDB12881	6,76E-01	-1,008
N-acetylneuraminic acid	HMDB00800	2,83E-01	-1,030
N-acetylputrescine	HMDB02064	6,89E-01	1,007
N-acetyltryptophan	HMDB13713	4,93E-04	-1,125
N-carbamoyl-beta-alanine	HMDB00026	3,45E-02	-1,035
N-epsilon-acetyllysine	HMDB00206	2,65E-03	-1,025
N-isovalerylglycine	HMDB00678	1,95E-02	-1,038
N-phenylacetylglutamic acid	HMDB59772	6,50E-03	-1,114
N4-(acetyl-beta-D-glucosaminyl)asparagine	HMDB01515	8,22E-01	1,016
N6,N6,N6-trimethyl-L-lysine	HMDB01325	6,73E-03	-1,029
niacinamide	HMDB01406	9,47E-01	1,004
octanoic acid	HMDB00482	3,22E-01	-1,011
phenylpyruvic acid	HMDB31629	1,78E-06	-1,030
phosphorylcholine	HMDB01565	2,58E-01	-1,012
phosphorylethanolamine	HMDB60152	9,24E-01	1,003
pipecolic acid	HMDB00070	4,42E-01	1,004
propionyl-L-carnitine	HMDB00824	1,09E-09	-1,057
protocatechuic acid	HMDB01856	2,15E-05	-1,138
pseudouridine	HMDB06075	8,09E-03	-1,012
pyridoxal	HMDB01545	9,61E-01	-1,015
pyridoxic acid	HMDB00017	4,36E-01	-1,028
pyrrolidonecarboxylic acid	HMDB00267	2,37E-05	1,015
quinic acid	HMDB03072	3,90E-02	-1,068
raffinose	HMDB03213	6,79E-05	-1,088
riboflavin	HMDB00244	4,11E-01	1,016
S-adenosylmethionine	HMDB62709	4,32E-06	-1,194
SAICAR	HMDB06274	7,21E-02	-1,206
shikimic acid	HMDB03070	5,92E-03	-1,093
sn-glycero-3-phosphocholine	HMDB00086	8,47E-04	1,023
stearoylcarnitine	HMDB62532	1,36E-01	-1,043
suberic acid	HMDB00893	1,02E-01	-1,013
suberylglycine	HMDB00953	3,13E-02	1,040
succinyladenosine	HMDB00912	1,41E-01	-1,021
succinylcarnitine	HMDB61717	1,07E-02	-1,021
taurine	HMDB00251	4,72E-01	1,005
theobromine	HMDB02825	3,34E-03	-1,040
thymidine	HMDB00273	3,47E-01	1,001
tiglylcarnitine	HMDB02366	6,09E-01	0,000
trans-2-dodecenoylcarnitine	HMDB13326	7,26E-01	-1,008
trigonelline	HMDB00875	2,81E-02	-1,038
uracil	HMDB00300	6,51E-04	1,003
uric acid	HMDB00289	4,82E-03	-1,009
uridine	HMDB00296	3,62E-04	1,029
urocanic acid	HMDB02280	8,95E-01	1,009
vanillic acid	HMDB00484	1,13E-06	-1,266
vitamin A	HMDB00305	4,87E-05	-1,066
xanthine	HMDB00292	9,80E-01	1,017
xanthosine	HMDB00299	3,82E-02	-1,032
xanthurenic acid	HMDB00881	1,02E-02	-1,102
	HMDB00331	1,49E-05	-1,143
	HMDB05881	2,39E-01	-1,017
	HMDB11602	5,98E-01	1,007
	HMDB61189	6,64E-03	-1,017
	HMDB62645	5,42E-05	-1,046

## Sheet: unannotated features + mode
t-test statistics of tumor vs. Control. Unannotated features in positive ion mode
feature	rho	p_rho	compound_ID	t_stat	p_ttest	FC	median_controls	median_UM
10002427	0.018788428620187952	0.89377269957239	8.17_100.0243m/z	0.5877407453255618	0.5575561343270856	1009813722469210	491162831994468	495982967714855
10002428	-0.08136276599901135	0.5624763581241023	7.71_100.0243m/z	0.8789321356214923	0.3807898901105728	1.00456e+16	6173801996150140	6201941405543070
100.02428*	0.030077613198841655	0.8307067025910148	3.94_100.0243m/z	-0.16236006106179854	0.871232433268523	1.00059e+16	5.39296e+16	5396144828815190
10002429	0.10192520933870204	0.4676993371556954	0.70_100.0243m/z	-0.3852408666343912	0.7005837308247089	1.00161e+16	9228348542769300	9243189426432610
100.02429*	-0.1843362567628741	0.1863866584392756	5.47_100.0243m/z	-0.1950089332141266	0.8456397012460556	0.9998147951357966	5559057031707450	5558027467304790
100.02429**	-0.13208345957024833	0.3457871666858926	5.00_100.0243m/z	0.35962704506047205	0.7196124146054854	1.00568e+16	5268300166727420	5.29825e+16
100.02429***	0.02233645805919341	0.8738626254245876	4.45_100.0243m/z	-0.13810216149092328	0.8903377775242729	0.9995643378294882	4068366416176180	4066593982832870
100.02429****	-0.10160266120788336	0.4691165248277563	1.53_100.0243m/z	0.1407304125649748	0.8882644717923258	1001050600743960	419987933757983	4204291733936450
100.02429*****	-0.017578873129617912	0.9005757265599318	1.32_100.0243m/z	0.5265097470133261	0.5992818812917589	1.0082e+16	3.69415e+16	3.72446e+16
100.02429******	-0.213002721889384	0.1256854582701027	1.60_100.0243m/z	0.3738753415832445	0.7090047062072709	1.00533e+16	3872859582976870	3.89351e+16
10002955	0.055397641468107835	0.693590709540163	7.72_100.0296m/z	0.7631061172150326	0.4465525574024313	1.02384e+16	3582090880033450	3.6675e+16
100.02955*	-0.0536236267486051	0.702942347929862	5.74_100.0296m/z	-0.022825021570692116	0.9818190183757612	1.03311e+16	2.80335e+16	2.89617e+16
10002956	0.12224574158027872	0.3831985166913435	7.97_100.0296m/z	0.3501142359504442	0.7267252243898841	1030270603980960	2654264231618530	2.73461e+16
10002957	-0.03064207242777435	0.8275776210755278	8.31_100.0296m/z	-0.05643328655489317	0.9550688555439321	0.9205945101421444	2.48319e+16	2.28601e+16
10003273	0.01253905858557608	0.928992546768432	0.70_100.0327m/z	-2490645117248440	0.013798447239692152	0.9875393339507722	7.13544e+16	7.04653e+16
100.03273*	0.01842556197301694	0.8958128342243336	8.08_100.0327m/z	-0.1563839027113709	0.8759326212240048	1003891333137510	5248092016022480	5268514090393140
10003923	0.01907065823465429	0.8921863987902638	0.65_100.0392m/z	-0.4627086998170532	0.6442179547446358	0.9979869505115736	5122417973459780	5112106292578800
10003924	0.44217316883605423	0.0009165099815300467	1.47_100.0392m/z	-2.31065e+16	0.022162191104624862	0.9909238897096656	6938704031958910	6875727588892860
1000473	0.017439449040832552	0.9013603688482514	2.36_100.0473m/z	-0.13308343063516367	0.8942989143309641	inf	0.0	0.4131289272376487
10004733	-0.05120451576746502	0.7157649527945849	2.17_100.0473m/z	0.16694574744023258	0.8676289388904664	1022847563230470	3717437303216440	3802371687057010
10004734	0.013909888141555459	0.9212529701606093	1.51_100.0473m/z	-1198989261297470	0.2323502016666404	0.9982313598755392	2.69434e+16	2.68957e+16
100.04734*	0.01141014012771071	0.9353712444883532	2.83_100.0473m/z	1.17524e+16	0.24168836926468226	1075128439952640	1.91339e+16	2057137619447070
100.04734**	0.14813022907847756	0.2898080129514347	1.35_100.0473m/z	0.4912164336699783	0.6239637390219661	1015989040232700	2.44555e+16	2.48465e+16
100.04734***	0.1138594901789931	0.41691276943529504	1.60_100.0473m/z	0.6160281177794318	0.5387737721617913	1045101138484800	1.97353e+16	2.06253e+16
10004735	0.052293115708978065	0.7099849013924753	1.97_100.0474m/z	-1097875682711730	0.2739504397857286	0.995842178833012	4018194157359070	4001487224638540
10005046	0.04144743481020004	0.7682433788304346	1.56_100.0505m/z	-0.7433623126985754	0.458380414205947	1.02019e+16	1.42863e+16	1.45748e+16
10005765	0.10458623141795613	0.4560958264089795	8.93_100.0576m/z	-0.2474059463731261	0.8049193908450322	0.99897318860354	7624301338165370	76164726186613
100.05765*	0.20473742603715545	0.1413999195963572	10.83_100.0577m/z	-4304741653751810	2.94229e+11	0.7848386994514627	3.72725e+16	2925290310284960
100.05765**	0.12493792781115193	0.37272923303222494	10.66_100.0577m/z	-6295934754389460	2.96045e+06	0.4849106792717109	2.78348e+16	1349739207616240
10005858	-0.20465678900445075	0.14156012843057664	3.63_100.0586m/z	-0.2381994454818173	0.8120389989666548	3249814447017440	0.2499308638358605	0.8122289320493296
10006306	-0.11078143290077383	0.4297001034870408	0.54_100.0631m/z	-0.8932571881664796	0.3730953821966083	0.7621929933419413	3.3037e+16	2.51806e+16
10007562	-0.1176091121997602	0.4016337100407926	3.59_100.0756m/z	1.71935e+16	0.08753481259888253	1.06705e+16	8007525434441240	8544469574340200
100.07562*	-0.05479286372282281	0.6967737676128157	3.70_99.0683n	-1.56488e+16	0.11963801878940965	0.9781855448175086	912373006962862	8924700868927550
10008864	0.1855054937370918	0.1835599355689538	9.42_100.0886m/z	-0.34894590516722584	0.7276004522140196	0.99632415418346	357810012188401	3.56495e+16
100.08864*	0.07930652166504228	0.5724253178868624	9.20_100.0886m/z	0.19376859292466364	0.8466091569411519	1.20513e+16	0.20745437119537247	0.2500104452274263
10008865	0.08648321757575786	0.5380598172785853	11.10_100.0886m/z	0.7876301227963327	0.4321081770205276	1.00668e+16	6320715146987110	6362952949834760
100.08865*	-0.20393105571010872	0.14300810192128546	11.69_100.0886m/z	1651429341078160	0.10066253253416133	1.05113e+16	4137265870257010	4.3488e+16
100.08865**	0.07785505507635823	0.5794965601831146	12.49_100.0887m/z	0.8108001870277731	0.4187156633606937	1032075828769380	3.87395e+16	3.99821e+16
10011201	0.0391895978944693	0.7805453344611446	11.90_100.1120m/z	-0.505711805012578	0.613772802387375	1.00044e+16	1.28224e+16	1.2828e+16
100.11201*	0.05088196763664635	0.7174806178834608	3.19_100.1120m/z	0.3833166159148654	0.7020068760770531	1.00144e+16	9002218303987340	9015209541050380
10012223	-0.10195684997165358	0.4675604410157629	3.19_100.1222m/z	-3.00406e+16	0.003104371460418249	0.9147900485013324	0.9482356771053324	0.8674365610498807
10051422	-0.04185061997372338	0.7660524522885609	12.43_100.5142m/z	-0.7453936708384793	0.45715536699782394	0.9035981394057888	1999016288165080	1.80631e+16
10051424	0.06600141126877185	0.6386747645578037	11.68_100.5142m/z	1.00928e+16	0.31440292132099723	0.9093313544507338	1.86654e+16	1.6973e+16
10051426	0.03285959082715275	0.8153109281983859	11.27_100.5143m/z	0.6100820999825612	0.5426951044418961	0.9638190441436848	1.53084e+16	1.47545e+16
10051548	-0.19211773041887467	0.16815264993812384	12.48_100.5155m/z	0.486384141609096	0.6273774145683961	0.9618993515457488	1.94795e+16	1.87373e+16
100.51548*	0.18245599890807115	0.19099754615752698	11.86_100.5155m/z	-0.7787772119815832	0.4372906709877272	0.879123633170234	1.75053e+16	1538934101050810
10051549	0.08902328410595495	0.5261423403120267	11.65_100.5155m/z	-1.00481e+16	0.31654368453597925	0.8468573769587436	2.05041e+16	1.73641e+16
100.51549*	-0.101320431593417	0.4703584519908727	11.51_100.5155m/z	-1.18503e+16	0.23780668867912566	0.9418580708593364	1.65662e+16	1.5603e+16
10093192	-0.02269932470636441	0.8718305174401152	0.67_100.9319m/z	-0.14911897912044886	0.881652349527461	0.98473382028846	4.37865e+16	4311805153030910
100.93192*	0.007015563266729754	0.9602365188319046	2.05_100.9319m/z	-0.7307159516071157	0.4660486992499319	0.9925156334261132	3.16364e+16	3.13996e+16
10093194	-0.08124181044995435	0.5630593415644662	8.77_100.9319m/z	0.5461111838974941	0.5857696605810754	1000629287947900	6993361814482820	6997762652787990
100.93194*	0.048099990008335265	0.7323348527141034	0.53_100.9319m/z	-0.9126122443037096	0.36285471536713376	0.9667651855530428	5364909011079410	5186607255571380
100.93194**	0.09422437271540612	0.5021553798223517	12.88_100.9319m/z	-0.3274351918183161	0.7437777381315207	0.98263474635434	3516711097254440	3.45564e+16
100.93194***	-0.06588045571971482	0.6392911543607919	8.64_100.9319m/z	0.9249849520503322	0.3564023787473273	1.00181e+16	6184298967005160	6195466615649870
100.93194****	0.14478379222123378	0.3009629492601457	12.73_100.9319m/z	-0.11594028106030882	0.907848984356574	0.985988059301291	3198288405697800	3.15347e+16
100.93194*****	-0.005523636740269847	0.9686878205092848	2.35_100.9319m/z	-1006732742150230	0.31562220918992945	0.9696838973459552	3483504251106210	3.3779e+16
10095983	0.11684306038906585	0.4047284420030647	1.92_100.9598m/z	1.5589e+16	0.1210456808799021	1.10978e+16	1.4262e+16	158277421887956
10096699	-0.1024493500512824	0.4654013250763542	1.36_100.9670m/z	0.18084073843547768	0.8567273146678582	1.03781e+16	2394908572264100	2485467261271690
10098838	-0.021731680313908385	0.8772512604462083	1.08_100.9884m/z	-0.778667897949211	0.4373548884002393	0.9980892114772985	3.47697e+16	3470329273468740
10008182	0.27323858531977196	0.047745968741674465	0.77_1000.8182m/z	-2.8328e+16	0.005223989956833972	0.9695187316548084	9231409993516490	8950024908299630
100112811	0.13737097281537355	0.3266474647833256	0.75_1001.1281m/z	-0.3439484111262787	0.7313482465103034	1.00071e+16	4020619950633290	4.02348e+16
10011981	0.11858425623831395	0.3977142785042991	4.81_1001.1981m/z	1415790679827180	0.15883022297473345	1.40284e+16	0.0279164315226613	0.03916216093144472
100139854	-0.12894438434100516	0.3574711487173992	4.81_1001.3985m/z	1.95786e+16	0.05203032447882637	0.04372603566812995	0.09692669717498464	0.004238220217867409
100159868	-0.055432650450486835	0.6934066106266258	4.81_1001.5987m/z	1.07946e+16	0.2820487505392659	0.0	0.2080305702835504	0.0
100179904	-0.09194307697083334	0.5126069254155661	4.81_1001.7990m/z	1.38041e+16	0.16943608071376992	0.0	0.05075461737166213	0.0
100179924	-0.03521950881774908	0.8023046583769162	4.75_1001.7992m/z	2100420344781580	0.03730036408283045	inf	0.0	0.9563156163312312
100199935	-0.2092382241779532	0.13267053002363766	4.81_1001.9993m/z	1.45273e+16	0.1483060445949682	0.0	0.050199254109290166	0.0
100279704	-0.02963410951896598	0.8331670975456444	0.77_1002.7970m/z	-0.7099376336647301	0.4788026675785402	1.00465e+16	9789723784431230	9835234018719110
100328988	-0.18542485670438716	0.18375388706783252	0.74_1003.2904n	-1.36991e+16	0.17268433381510975	0.942143804957148	7.55288e+16	7115896516984760
100429264	0.1451899041580106	0.29959462875996995	0.78_1004.2926m/z	1742771189366630	0.08334409104311273	0.9912891021304872	5926384288375690	5874760160104170
10057969	-0.12752746722243455	0.3628231142713545	0.75_1005.7969m/z	-0.8788004301266001	0.3808610874083246	1.00072e+16	9304465086820120	9311118570546230
100676103	-0.04947464813173383	0.7249823778437798	0.77_1006.7610m/z	0.4966450294837119	0.6201385195856145	0.8675281745185471	5730674938707400	4971521968336020
100776231	0.22373195728208856	0.10730131709616303	0.77_1007.7623m/z	1.85377e+16	0.06566087673086624	1.18894e+16	4477463851945740	5323423742960770
100812405	0.06426771506562146	0.6475326485737583	0.77_1008.1241m/z	0.7027428593696307	0.483263356602464	1.01781e+16	7665020081166130	7.80152e+16
100845838	-0.0908192410408626	0.5177958132168468	0.77_1008.4584m/z	-1399627512417670	0.1636103081195559	0.9354821566620564	6499254805852060	6079936902474720
100880585	-0.13510734829667345	0.3347580132703515	0.76_1008.8059m/z	-0.12837887560490233	0.8980145016265987	1.00515e+16	1.07098e+16	1.07649e+16
100977192	0.28194738485187626	0.040819015392923375	0.73_1009.7719m/z	-0.371530663556576	0.7107464488103871	0.9660758359857732	2239601090113680	2.16362e+16
10100848	0.02007862114346266	0.8865244973876788	0.53_101.0085m/z	0.4947690827665212	0.6214592255164291	1.16936e+16	4251920845900490	4972039249969440
10102327	0.03265799824539108	0.8164243157142127	0.83_100.0160n	1.0235e+16	0.3076549854193542	1.00744e+16	4909261587744810	4945766861389050
10102329	0.16220139128544234	0.2458900399954463	2.00_200.0320n	-1.14185e+16	0.2552643743143569	0.9981893689410118	8650223408490700	8634561045320100
101.02329*	0.08180626967888703	0.5603411750144329	1.18_100.0160n	-0.33575333099407056	0.7375080175674593	1.00126e+16	5314034076721610	5.32071e+16
101.02329**	-0.004112488667938136	0.9766846937584552	3.65_101.0233m/z	0.9677027241495342	0.3346907284769499	1.0446e+16	3.27141e+16	3.41731e+16
101.02329***	0.2637637339769734	0.056341182520223486	1.06_117.0426n	-0.3968381506986676	0.6920291756394095	0.9813687701615724	4959321188057890	4866922935160600
101.02329****	0.0974901725399452	0.4873860849358114	3.45_101.0233m/z	0.054269365335810435	0.956789994343142	1.01379e+16	4734701912598050	4799973355750570
101.02329*****	0.10986795706011196	0.43353709422443176	2.52_101.0233m/z	-2.32768e+16	0.021214137047695158	0.9730133820813198	3838202278987490	3.73462e+16
101.02329******	0.07027517400211933	0.6170536347550809	0.66_101.0233m/z	0.4673417861248188	0.6409074964477007	1015363906222400	3.30195e+16	3.35268e+16
1010233	0.2678359041285592	0.052505336499270715	4.79_101.0233m/z	-0.8985504786471279	0.3702769323567159	0.9707903327523072	3.0158e+16	2.92771e+16
101.0233*	0.2132043144711457	0.12531940027378582	5.27_101.0233m/z	-0.4038179338713773	0.6868996217112795	0.9883731218571852	3.51429e+16	3473430450019370
101.0233**	0.30089708753747363	0.028571917173633683	1.33_101.0233m/z	-0.4887100750802396	0.6257332942947448	0.9980600850566594	3.88511e+16	3877573295917140
101.0233***	-0.1595806877225406	0.2537055330832326	4.24_101.0233m/z	-0.61635644411797	0.538557663174215	0.9701951291105758	4179323174333540	4054758986717350
101.0233****	0.11216611249219503	0.4239205136842823	3.85_101.0233m/z	0.4320464825136747	0.6663042133939534	1017442330150430	2693866553673290	2.74085e+16
10102512	0.0983771798996966	0.483414349207856	0.70_101.0251m/z	-0.4540574446058205	0.6504185681649161	0.9992742417320872	8006881390434750	8001070330065450
10103092	-0.03265799824539108	0.8164243157142127	1.28_101.0309m/z	1.58764e+16	0.1143921452982288	1.10858e+16	1.91219e+16	2119820630343120
10103455	0.10627960910475416	0.44879437824429824	0.90_101.0345m/z	1330326055467080	0.18535236515881026	1.07404e+16	3187811078371690	3423846528851640
10107087	-0.016490273188104875	0.9067045296880704	0.82_101.0714n	-0.7782571090115344	0.4375962586729236	1005288380599540	7.63614e+16	7676526897164250
10107901	-0.1399052517426013	0.317715461675424	4.01_101.0790m/z	-2.24463e+16	0.02619841474337475	0.9414439811089572	3.01462e+16	2.8381e+16
101.07901*	0.10208648340411138	0.4669916074846986	1.74_101.0790m/z	-0.6851126347228288	0.4942895776222786	1.00796e+16	2.84117e+16	2863788521134550
10107902	0.16142668148173275	0.24818313557831406	0.88_101.0790m/z	0.07665504350188852	0.9389961921664474	1.44371e+16	0.0928543056677286	0.1340547268600874
10109607	0.10466686845066077	0.4557466753804289	4.89_101.0961m/z	-1205475048540790	0.2298452858736465	0.9864187375168064	5831211170498850	5752015960997380
101.09607*	0.06741255934110355	0.6315015328434235	5.07_101.0961m/z	-0.4904249640660092	0.6245223014802785	0.9961361743501672	6537930621826290	651266919779286
10110729	-0.05108356021840802	0.7164081645447378	3.37_101.1078n	0.2028266471899688	0.8395348278088168	1.00906e+16	5626291280660610	5677266897508380
10111823	-0.10273157966574872	0.4641664606372201	3.19_100.1110n	-0.283210104133826	0.7773912591650307	0.9195297443568166	1.44043e+16	1.32451e+16
10151179	-0.0884202887582664	0.5289595795430803	12.12_101.5118m/z	0.3594252234448093	0.7197630667392281	0.9873169173981379	1.44855e+16	1.43018e+16
10152754	-0.02104626553591869	0.8810943505005105	0.70_101.5275m/z	-2.05835e+16	0.04122000714808476	0.9859890591110988	6294870331162990	6.20667e+16
10196454	-0.21546215138687644	0.12127444791382175	1.06_101.9645m/z	-1.16732e+16	0.24486310299922506	0.995287641519499	387584127906921	3857576925548710
101077558	-0.13234819783356566	0.3448127016040715	0.74_1010.7756m/z	182385680436153	0.07008749099943744	0.9637387918518336	5749332027176750	5540854301826380
101128404	0.14036841721912013	0.3160999970711648	4.44_1011.2840m/z	0.26631453998584365	0.7903486482905293	inf	0.0	1.24406e+16
101139537	-0.0006541117441391246	0.99629108551126	4.42_1011.3954m/z	0.9401239140319232	0.34860743194968125	inf	0.0	0.21205203840471354
1012.28	-0.19679298856507932	0.15784219855204046	0.78_1012.2800m/z	0.8419619962877045	0.40109811888694025	0.35360456912692945	0.3334984510697557	0.11792657609501934
101271253	0.23537949846492975	0.08976142074060768	0.78_1012.7125m/z	0.4556772733869673	0.6492557109044612	1.52562e+16	2.31318e+16	3.52904e+16
101378386	-0.08233041039146738	0.5578227003494494	0.75_1013.7839m/z	1.16835e+16	0.2444470759821231	1.00523e+16	7726429412868850	7766853086683690
101428568	0.3300381795415353	0.015801333624386852	0.75_1014.2857m/z	-0.6055166547794656	0.5457156796002296	1.26706e+16	0.19463639192953253	0.2466151183030048
101474759	-0.1850664770292204	0.18461765821372292	0.77_1014.7476m/z	2.05205e+16	0.041836790172968936	0.0	0.058324215955073026	0.0
101478777	0.2644894672713154	0.055641469867362035	0.74_1014.7878m/z	-2089770499812940	0.038261047442800136	0.9853524012051498	7895563761985730	777991271174101
101481211	0.3053321243362304	0.02620003497399747	0.76_1014.8121m/z	-5467313569083770	1.77697e+09	0.8330911522655995	9952129304613620	8291030869876800
10157477	0.09841948237981224	0.4832253590371693	0.77_1015.7477m/z	1.8313e+16	0.06896344993112563	0.7426880881889575	0.1768262520632388	0.13132675108646552
101650501	-0.09315926041531687	0.5070214387843284	4.66_1016.5050m/z	1.41377e+16	0.1594218520347136	0.08834699466045852	0.0830067055769635	0.007333392974390248
101663058	0.12483505034058573	0.3731261113378879	4.65_1016.6306m/z	1697646040754320	0.09156855682107548	3.2094e+16	0.016132135624168657	0.05177452412727458
101688053	0.05986151070123115	0.6702617080284201	4.65_1016.8805m/z	1.98474e+16	0.04892681950872057	0.2384807759077835	0.11051250178816473	0.026355107173951828
101729459	-0.12873702271300458	0.358251365998267	0.77_1017.2946m/z	0.9005064510691121	0.3692388483598431	1.00407e+16	8784233166241900	8819991593898850
101768706	0.2703857208923134	0.05021328988018837	9.09_1017.6871m/z	-251946095467111	0.01275991958455968	0.6368345139636908	4.63005e+16	2948575824123880
101863026	0.3424616260329349	0.012069099004883956	9.03_1018.6303m/z	-1.07052e+16	0.2860380912716403	0.6539781533934282	3.33806e+16	2183017199038900
101877641	0.15358561322449565	0.2722095356921941	0.77_1018.7764m/z	3134431756824000	0.0020576744038816467	1.97635e+16	2835851543981940	5604644605132420
10201298	-0.1740147165766764	0.21270145660327025	0.67_102.0130m/z	-2757034399080560	0.006528922118009656	0.9669034030036016	634941727518739	6139273170468540
10202058	0.15744698021022813	0.2601913273545301	0.71_102.0206m/z	-1.68306e+16	0.09436446174213572	0.8936175596713413	3102347136163320	2.77231e+16
10202185	-0.09523233562421447	0.4975725904666116	3.66_102.0218m/z	-0.9973921858937842	0.3201187493509865	0.9818586714581242	2163210079432860	2123966574676770
10202186	-0.028989013257328625	0.8367486795938676	6.29_102.0219m/z	-0.4471010561814646	0.6554222289453951	1.00196e+16	271024531964378	2.71556e+16
10202664	0.012055236389348065	0.931725755758778	2.00_102.0266m/z	-0.011986413630419005	0.9904517699122952	1.01822e+16	6311879537189810	6.42691e+16
1020338	0.06975103328953898	0.6196885052442085	0.70_102.0338m/z	-1.78917e+16	0.07552777965504352	0.9903697324376364	7896356987921700	782031295736008
10203691	-0.017578873129617912	0.9005757265599318	6.85_102.0369m/z	1603151886362200	0.11092392162520212	1.05669e+16	4.2562e+16	4497474353768000
10203714	0.0056042737729745185	0.9682309411657216	1.40_102.0371m/z	-0.9631121142143488	0.3369818041040703	0.8354872107466441	2.27093e+16	1.89734e+16
10204637	0.12224574158027872	0.3831985166913435	3.76_102.0464m/z	-1.75978e+16	0.08040447393816509	0.9833350172247182	5018923144436920	4935282876684410
10205491	0.2134462255692597	0.1248811955112832	1.40_102.0549m/z	-1.61099e+16	0.10920400720053132	0.9950914436913024	7181479351807340	7146228656029250
10206302	0.13159963737402036	0.3475724435352892	4.09_102.0630m/z	-1.16462e+16	0.2459502690956717	0.9833350457752597	4820780695460550	4740442605843190
10208059	0.06789638153733157	0.6290498256572894	4.26_102.0806m/z	0.928803089095824	0.3544260620891846	1.00523e+16	3.45588e+16	347394842237777
1020913	0.06071968562661601	0.6658110473017954	11.87_118.1106n	-0.4299555240839868	0.6678213242494349	1.00075e+16	1.3037e+16	1.30467e+16
102.0913*	0.09462755787892946	0.500319668363101	4.31_101.0840n	-0.02113667080353025	0.9831636431861904	0.9999119095226028	1.19624e+16	1.19613e+16
10209301	0.2740046371304664	0.04710055560407951	4.31_102.0930m/z	0.5252542912735081	0.6001521663787408	1.57883e+16	0.2416453418381984	0.38151764610716105
10210185	-0.08986997294935398	0.5221991449240613	4.33_102.1019m/z	-0.3380287160067592	0.7357960139454511	0.9987316630391134	3737736478187240	3.733e+16
10211872	0.3871383940151174	0.004185929576135196	10.90_102.1187m/z	2.59605e+16	0.010330960887647357	1.07086e+16	2050800241623190	2196121015765230
102.11872*	0.022618687673659744	0.8722820265419091	11.16_102.1187m/z	1.54685e+16	0.12392671884666424	1061246929536540	1.88934e+16	2.00506e+16
102.11872**	-0.08067735122102168	0.5657836634400026	9.93_102.1187m/z	0.8381358048432432	0.40323676657346974	0.9356392741085324	1.68398e+16	1.5756e+16
102.11872***	0.057051850703578176	0.6849111956697198	11.69_102.1187m/z	-0.08751550429133466	0.9303739996299472	0.903946792254666	1207236674895910	1.09128e+16
102.11872****	-0.26801919165452304	0.05233779681465285	12.02_102.1187m/z	0.3653531936876902	0.715342664919062	0.6548030287560928	1.10539e+16	0.7238109042386318
10212768	0.06293720402599441	0.6543636398609952	12.14_102.1277m/z	-0.6841364872649829	0.4949040203203634	1.0023e+16	1055048883324210	1.05748e+16
102.12768*	0.13917951844825924	0.3202572686493653	3.28_102.1277m/z	-1147796549260120	0.2528096957411627	0.9924139445156424	9352747542693990	9281797080903930
10250847	-0.07394415899018178	0.5987447496876821	0.53_102.5085m/z	0.7558726308014811	0.4508654153762911	1.12645e+16	5425653009765520	6111748214694860
1025085	-0.09970769093932363	0.4774888551902701	9.27_102.5085m/z	0.05225771485337689	0.9583902027312852	0.9982505451536238	4465831252143430	4458018482016270
10250896	-0.1906259453138383	0.17154351869614848	9.18_102.5090m/z	0.8129034146570528	0.4175123081584726	1002230513997230	5814465969764660	5.82744e+16
10251096	-0.17029616797839967	0.22279069796279352	4.61_102.5110m/z	-0.786891005316654	0.4325394774039133	0.7427389274045695	0.9189082795015782	0.6825089499001805
10253231	0.10079629088083664	0.4726695542088796	7.78_102.5323m/z	1.67332e+16	0.0962678586986306	1.01811e+16	4607463992286990	4690900233556120
102.53231*	-0.02398951722963913	0.8646119772293305	7.91_102.5323m/z	0.9154912673378628	0.36134675841720293	1.04077e+16	3.35286e+16	3.48956e+16
102.53231**	-0.21009978871201596	0.1310467155941951	8.34_102.5323m/z	-0.8501590214385792	0.3965396033145666	0.9500562729051304	3644834233443090	3462797627181970
102.53231***	0.07210285890461689	0.6079033405100904	8.92_102.5323m/z	-0.7037529951742887	0.4826357109012531	0.5209132965718203	0.018013194076058562	0.009383312307947651
10253232	0.0783791957889386	0.5769384716770878	8.09_102.5323m/z	-0.20043019582216814	0.8414052052738684	0.9106568189271508	2.99427e+16	2.72676e+16
10253546	0.04697107155046989	0.7383908801616329	4.46_102.5355m/z	-0.6698221899280362	0.5039613925835695	0.9977692876566624	5378217434244430	5366220178228710
102.53546*	0.0783345103074374	0.5771563593707841	9.64_102.5355m/z	0.15251815895316678	0.8789753553025293	1099919539826940	1382831268482080	1.521e+16
102.53546**	0.13361556319163706	0.3401712814529555	3.84_102.5355m/z	-0.046601704801792834	0.9628902774117633	0.9488135370391152	1.88717e+16	1.79057e+16
10295426	-0.03318213895797143	0.8135302614355464	12.98_102.9543m/z	0.20431646334798464	0.8383725194538356	1004054950620080	3.66914e+16	3684020850906600
10295619	-0.048140308524687585	0.7321188623249046	12.88_102.9562m/z	-0.6020835784282673	0.5479925930508187	0.9929531967997512	2422443900999960	2.40537e+16
1029562	0.07741155139648256	0.5816651211640711	3.02_102.9562m/z	0.9276107018152348	0.35504250526319203	0.9999189800745376	4.99822e+16	4997817023664610
102.9562*	-0.14635621435897486	0.29568737768604536	1.64_102.9562m/z	0.6489507958388161	0.51732440927222	100100738774195	4287636246945600	4291955559142710
102.9562**	0.20485838158621245	0.14115985985740698	2.28_102.9562m/z	-0.037014148398888135	0.9705210473343509	0.9946004738185602	3.6663e+16	3.6465e+16
102.9562***	0.07559721816062749	0.5905745943486418	12.73_102.9562m/z	-0.20432033472104225	0.8383694995912211	1011266440480350	3276057322959350	3.31297e+16
102.9562****	-0.16062896914770128	0.2505594417082109	2.50_102.9562m/z	0.5588752251510223	0.5770482526513672	1.01496e+16	3.43023e+16	3481551347332620
102.9562*****	-0.02709404298876889	0.84728831870881	1.97_102.9562m/z	-0.5961132998556392	0.5519635072163149	0.9927552247173688	3.32361e+16	3.29953e+16
102013721	-0.08555589169965415	0.5424431529213745	0.76_1020.1372m/z	-0.8475555772346298	0.3979839935687235	1.00935e+16	9175275553242680	9261109356069350
102274077	0.4494120534587854	0.0007360194779743178	0.78_1022.7408m/z	0.4485612775420484	0.6543706006663517	0.839854561510302	5135270726870760	4.31288e+16
102278095	0.06829956670085492	0.627009761494063	0.77_1022.7810m/z	0.9061626133363956	0.3662472744584082	0.9771112426449524	662512924800094	6473488272197610
102331983	-0.2454279689735208	0.07650429394933025	0.78_1023.3198m/z	-1.98998e+16	0.04834084448216585	0.7030507699088585	5900657920566160	4.14846e+16
102345611	0.17132719101887167	0.21996060559685854	0.75_1023.4561m/z	1.35922e+16	0.17603703523076006	1.07222e+16	6.0978e+16	6538189424647640
102467726	0.22247757323218267	0.10933727548969392	9.83_1024.6773m/z	-3600735983856660	0.0004258901079856949	0.9273343695225488	8796532948919890	8157327336170950
102478048	-0.1932707041325809	0.1655655534458135	0.77_1024.7805m/z	0.4093924117621854	0.6828132643776177	1.03917e+16	5.26877e+16	5475150334214770
102486259	-0.021433340885643568	0.8789236966096644	0.76_1024.8626m/z	0.055406746101113465	0.9558853190079656	1.05131e+16	4886348842741850	5137071606716340
102546222	-0.06648523346499986	0.6362116301247343	0.77_1025.4622m/z	-0.4830556407197774	0.6297334656867846	0.999257093634744	8739395939980420	8732903387108120
102682612	0.2849136106705924	0.038657399665503016	0.77_1026.8261m/z	-3786542429240880	0.0002175350378493376	0.929234945464467	8224008353250410	7642035953631960
10277558	0.11437587239336185	0.4147890774199024	0.78_1027.7558m/z	1.00521e+16	0.31635108847350396	2166478824042910	1.27277e+16	2757419829703020
102879459	0.21183348491516635	0.12782455215660346	0.74_1028.7946m/z	0.4577531959024042	0.647766690068342	1019701236799280	7576748574785890	7726019892626410
102975708	-0.17119242043201302	0.2203291134627401	0.78_1029.7571m/z	0.9969212771286416	0.3203465590420201	0.8615888150714123	2.21554e+16	1.90889e+16
103.00571***	-0.10310223826551444	0.4625473768524623	11.45_103.0057m/z	2094718159015060	0.0378121271918559	1.40671e+16	0.14143440012560676	0.19895742884631898
10301017	-0.03538173940242989	0.8014124594419962	0.53_103.0102m/z	0.18883577409147825	0.8504669771403092	4872102827358810	0.15553644983191228	0.7577895769834128
10303086	0.14321137008349272	0.3062989752114525	3.46_103.0309m/z	-0.07402755942871478	0.9410832936874568	1040529740490270	3664421905645850	3.81294e+16
10303891	0.05705070063855355	0.6849172161345112	1.05_103.0389m/z	-1.37745e+16	0.17034734939031332	0.9945007042206782	8569557436097210	8522430905058220
103.03891*	-0.04894667885173428	0.7278033985868206	3.18_103.0389m/z	0.9024882868205418	0.3681889035174064	1.00134e+16	8469784502639370	8481139191211820
10303892	0.008507206950342612	0.9517911515554768	1.24_103.0389m/z	0.3326076628775932	0.7398769890730471	1.00184e+16	8308016475723920	832328493844989
103.03892*	-0.05926821903793196	0.6733452229278889	0.57_103.0389m/z	0.15858543652577212	0.8742006139816847	0.9950709707130846	6874407167382480	6840523013124270
10303893	-0.03995564970516366	0.7763653131630944	5.28_103.0389m/z	0.05657863391102098	0.9549532567120418	1004731039968100	5851305706747750	5878988467911990
10305012	0.24130632036872296	0.08174115437961975	0.86_103.0501m/z	0.5231417516245637	0.6016178854345144	1.03764e+16	3.83596e+16	3.98035e+16
10305014	0.006249370034611873	0.9645762828447272	1.72_103.0501m/z	-0.6777398495224461	0.4989406060539858	0.9881969971164156	3473262681918990	3432267752468850
10305416	0.26170748964300433	0.0583623644726801	3.28_103.0542m/z	-1972088940635440	0.05036757652601753	0.9813333528157352	579516492152977	5686988622564940
103.05416*	0.06442898913103079	0.6467065889601229	5.69_103.0542m/z	0.7298034331795942	0.4666047853549717	1.01287e+16	3752538354776830	380081580787261
10305823	0.007814876874334574	0.955710379080646	1.09_103.0582m/z	0.20830370424649894	0.8352635555596196	0.8624269526474058	0.9701032498057416	0.8366431894833106
10305825	0.2468702756253452	0.07473574626224608	1.66_103.0583m/z	-1.44339e+16	0.15091635149319882	0.9507569563068068	2.26983e+16	2158060653370500
1030753	0.09672412072925086	0.4908299260307195	8.68_103.0753m/z	-1.25622e+16	0.2109137818012005	0.9865553955077424	5249357585057830	5178782048488290
103.0753*	-0.06370325583668877	0.6504271699875199	1.31_103.0753m/z	-2185435925908420	0.030348197450329163	0.9910533595050304	5235407448333040	518856814004812
103.0753**	0.07785505507635823	0.5794965601831146	3.51_103.0753m/z	-1.04111e+16	0.299436890528866	0.9828441070972024	512684169233539	5038886145332080
10307532	-0.17897389408801356	0.1997505481693252	4.48_103.0753m/z	0.4595274577725301	0.6464951712540014	1.00653e+16	4479354398446430	4508587231389240
10309752	-0.21429291441265874	0.1233566038308024	4.30_102.0902n	0.4953945618580061	0.6210187379690102	1.00208e+16	5141168644368390	5151880979105150
10309754	-0.036165709168044194	0.7971045203172615	10.57_103.0975m/z	0.2374625662753954	0.8126095326014229	1.01455e+16	2.73646e+16	2.77629e+16
103.09754*	-0.07087995174740434	0.6140193345757988	9.88_103.0975m/z	1.91313e+16	0.057562885629324226	1.02539e+16	1.44509e+16	1.48179e+16
103.09754**	0.12091766802829045	0.3884268002053708	11.71_103.0975m/z	2187434469953370	0.03019928899881652	1.00725e+16	1.24614e+16	1.25518e+16
10309755	-0.07337969976124907	0.6015459031206031	11.15_103.0975m/z	-0.4602085339654498	0.6460073567464666	0.9303110191885204	2294828311175880	2.1349e+16
103.09755*	-0.0800322549593843	0.5689046733867646	11.32_102.0903n	2048642073795660	0.042172997955826914	1.01217e+16	1.49008e+16	1508216596293770
103.09755**	-0.1629271245797844	0.24375502548233705	12.12_102.0903n	0.3620015491187125	0.7178407650528522	1038645833512750	1.29851e+16	1.3487e+16
103.09755***	0.003064825113701541	0.9826232411189196	12.40_103.0975m/z	0.9174086758911728	0.3603446741872109	1.08183e+16	1.25715e+16	1.36002e+16
103.09755****	-0.026588668037720503	0.8501037263834672	11.52_103.0975m/z	0.13595726487191792	0.8920303492005982	0.8956980909704693	1.27695e+16	1.14376e+16
10312471	0.1621207542527377	0.24612804658064996	3.45_103.1247m/z	-0.056679573528292275	0.9548729771640456	1.0002e+16	2.09708e+16	2097511670716100
1035075	-0.055841145147983516	0.6912597927657576	8.31_103.5075m/z	0.06107559942555664	0.9513771785975874	1.0033e+16	5.83809e+16	5.85733e+16
10350751	0.12047172686077598	0.3901917633009063	7.13_103.5075m/z	3.91997e+16	0.00013226997449814498	1.0119e+16	6868228253719340	6949940388828630
103.50909*	0.002061506098888674	0.9883113072579351	0.56_103.5091m/z	0.8219865176485923	0.4123391202951397	inf	0.0	0.5018013695050332
10352036	-0.006249370034611873	0.9645762828447272	1.27_103.5204m/z	1130604718680810	0.2599567269676906	1.00676e+16	7089925921829970	7137869508431640
10352037	-0.013345428912622774	0.9244390193669554	0.68_103.5204m/z	-0.6996305614612418	0.4851999859961215	0.9984542076838482	4.28696e+16	4280334563596010
10352602	-0.11006954964187364	0.4326886699327954	0.71_103.5260m/z	-1.0546e+16	0.2932378028314457	0.9623326202410144	4.09957e+16	3945151803572550
10353854	-0.06276969402957551	0.6552256633217088	0.69_103.5385m/z	-204379200838896	0.04265609295440039	0.3276188638455184	1.72545e+16	0.5652885220900739
10353856	0.29081745844939	0.034635439036283286	1.50_103.5386m/z	-1.7149e+16	0.08834843581195767	0.9522338922699848	4910145373717110	4675606840826100
103.95412**	-0.07374256640842011	0.5997445027338593	11.55_103.9541m/z	-1.40205e+16	0.16288743213975232	0.9155545473451894	2.32194e+16	2.12586e+16
103.95412***	-0.013749722790641385	0.9221568894596092	11.97_103.9541m/z	0.4561079439375218	0.6489466822744292	1.04853e+16	1.68638e+16	1.76822e+16
103.95412****	-0.2379646804611437	0.08619067906105947	12.11_103.9541m/z	-0.026788548508437083	0.978662624979252	1.00518e+16	1.51556e+16	1523416042694140
10395551	0.016812821318923556	0.9048880097647996	12.48_120.9588n	-0.5561015717613523	0.5789381717632014	0.998155969618002	1.26669e+16	1264356670728990
10395553	0.1649027318810488	0.2380071823151339	0.50_103.9555m/z	0.036471464223215136	0.9709530597220328	1.01018e+16	6308916552277750	6373120879361230
103076626	0.13284951138094273	0.3429720971175618	0.74_1030.7663m/z	-1204413391960920	0.23025398203633754	0.9898248465316698	81670020390389	8083901539915510
103078666	-0.15397641394956607	0.2709767075869001	0.77_1030.7867m/z	-0.8730210685107997	0.3839934151428125	0.9943568034836412	8457957625244920	8410227708238620
103180257	0.28593891797075743	0.037932526505177665	0.75_1031.8026m/z	-1.77328e+16	0.07813412511498177	0.9908233679632832	7.96883e+16	7895705498374000
103377177	0.2269932470636441	0.10214432662596916	0.78_1033.7718m/z	1.55732e+16	0.12142081648544165	1.02683e+16	7054584036520800	7243857311486450
103477106	-0.00020163323116457508	0.998856704861229	0.78_2023.5637n	1.0876e+16	0.27844875529421464	0.8668815397159725	6.07493e+16	5266241332775270
103481328	0.2467896385926405	0.07483376011523693	0.77_1034.8133m/z	-3281054353034040	0.0012759536279708238	0.9675722286850832	1.08525e+16	1.05005e+16
103644606	-0.0120070069919715	0.9319982566736504	0.77_1036.4461m/z	-1783428546516720	0.07646087519852246	inf	0.0	0.2683288841274936
103678278	0.21755871423719786	0.1176078650525164	0.74_1036.7828m/z	-0.161745501397177	0.8717155694135504	1006890862987580	8751752930288640	8812060060632450
103728473	0.003296171939316444	0.9813117895520501	0.74_1037.2847m/z	-0.01721674286042555	0.9862857051532128	1.01776e+16	4.41606e+16	4494463483223160
103747569	0.3050963634445061	0.026321827260412742	0.77_1037.4757m/z	-4665171558173880	6.58868e+10	0.9146570424724608	7914022210243480	7238616148882660
103778588	0.16716056879677954	0.2315527471091687	0.78_1037.7859m/z	2531294911856520	0.012354054636167582	1.0474e+16	7903776540055070	8278379308368990
103828713	0.1225370647795911	0.3820572717886556	0.78_1038.2871m/z	2673420256757700	0.008307265165176339	3.93888e+16	1.40818e+16	5546645975050350
103879885	-0.1769982867867492	0.2048411894048872	7.79_2031.6193n	0.5765892260581751	0.5650480094364876	1.02115e+16	7036827360217460	7185638326258990
103879927	-0.08038721859964616	0.5671863530824447	7.61_1038.7993m/z	192156474470212	0.0564837264687551	0.9529024703869091	3.46556e+16	3.30234e+16
103904957	-0.1257131339865795	0.3697468273215457	7.81_1039.0496m/z	-0.4651318009503223	0.642485693024454	0.9714024705999116	6502153904643660	6316208367191720
103904983	0.09023604865912277	0.520498834747917	7.62_1039.0498m/z	2.3187e+16	0.021709272196013905	1040980720350730	3357352771097410	349493950612851
10391232	0.0052168725767795	0.9704259977825412	0.74_1039.1232m/z	0.8927698356672527	0.3733555491164571	3.20795e+16	0.2286488858989184	0.7334936282769013
1039457	-0.14000337648076247	0.3173727770481124	0.77_1039.4570m/z	0.5418398926379269	0.5887018801537557	1.19794e+16	0.7625862453111564	0.9135305819042194
103967208	0.22835130449879276	0.10005417865411027	8.87_1039.6721m/z	-2716214499210010	0.007348716744546332	0.5780596180858494	6095326617547680	3.52346e+16
10400807	-0.053472335822320284	0.7037419167024427	4.46_104.0081m/z	0.973051211334253	0.3320342261658891	0.8800472075669473	1.30132e+16	1.14522e+16
10400863	0.04156839035925704	0.767585911363588	0.71_103.0014n	0.26704501970130684	0.7897871949369659	0.867471429196718	5.16387e+16	4479506916149820
10403022	-0.21207539601328032	0.12737974276202846	8.34_104.0302m/z	0.4645881315176828	0.6428741889669134	1010738792647170	5150845426464310	5.20616e+16
104.03022*	-0.007902429205057595	0.9552146927379532	8.64_104.0302m/z	-0.09766686432257417	0.9223222003656804	0.9798937586560468	3.28218e+16	3.21619e+16
10403415	0.12478580811047578	0.3733161666772389	1.47_104.0342m/z	-2571975494893630	0.011045464053608652	0.8792511712815974	1934883256789220	1.70125e+16
104.03415*	0.06743975388791187	0.6313636232568802	1.53_104.0342m/z	-1.58279e+16	0.11549539962911015	0.6827551563605665	0.6940843211862345	0.4738896492389252
10404536	-0.07390384047382945	0.5989446416253897	2.50_104.0454m/z	-0.10164202908552038	0.919171343426843	0.9658324872014098	2154028711540810	2080430907970710
10404537	0.008466888433990278	0.9520193614605746	0.63_104.0454m/z	0.1899271444054186	0.8496131319910702	1.00956e+16	1.65152e+16	1.6673e+16
1040494	-0.05507509333728915	0.6952876918765055	1.51_104.0494m/z	-0.7291655691966816	0.4669937184835666	0.9099995262156031	1092165077999540	0.993869703528814
10405278	0.10216712043681604	0.466637958892453	1.40_103.0455n	-1742217174298130	0.0834412746429481	0.9926356753740512	8436694368401650	8374563812302820
10405279	0.12001212910197212	0.3920157168809111	4.13_104.0528m/z	-4376771622256550	2.1964e+10	0.6349579823329263	1.37228e+16	0.8713424170217642
10406043	-0.1334946076425801	0.3406125673627747	3.74_104.0604m/z	1.41586e+16	0.15881035471277025	0.9499949539540332	1248285660581570	1.18587e+16
10406194	0.08463539043271633	0.5468112402987186	3.77_104.0619m/z	-0.2784570488417389	0.7810302862202787	0.9194761762461544	29629745545783	2724384513758300
10407058	0.14982360676527562	0.2842676251186261	0.89_104.0706m/z	1706747936636860	0.08985863745335218	1.00334e+16	92947935510903	9325858581970970
10407245	-0.040358834868686994	0.7741678151222847	0.86_104.0725m/z	1053051109428600	0.2939459137880725	0.9937387723922622	2078884594007010	2065868224393710
10408181	-0.04592279012530919	0.7440284805531785	0.85_104.0818m/z	1.36608e+16	0.17388020346420785	1039534597255940	3.90383e+16	4058164192307900
10410343	0.3237418760964648	0.018042258767593536	0.87_104.1034m/z	1.53951e+16	0.1257066947009197	0.4755127036021208	0.015071464165894452	0.007166672672766955
10410687	0.0616470115027197	0.6610145655202331	0.86_104.1069m/z	0.3601765892833059	0.7192022565608885	0.9997241065901556	12259978543034	1.22566e+16
10410692	0.1801431310622313	0.19678029375125444	9.03_104.1069m/z	-1.98794e+16	0.04856770756609655	0.9798014164157794	9908859385049340	9708714460536140
104.10692*	0.2225985287812397	0.10913967425971864	8.87_104.1069m/z	-2.0497e+16	0.04206850649686771	0.9719052548068986	8780178658878730	8533501776707620
10411773	-0.06563854462160082	0.6405246589330833	0.85_104.1177m/z	0.19308415652822603	0.8471442160668717	0.9978644577092708	5727515474133910	5715284122618090
10450694	-0.017861102744084256	0.8989877014188766	8.07_104.5069m/z	0.6214155233733155	0.5352332651674387	100438553851829	6787665679827930	6.81743e+16
10450695	-0.22445318053344707	0.10614398215875066	7.11_104.5070m/z	1209534267030250	0.2282874502277619	1.0019e+16	8310667186727190	8326456894514110
10451922	-0.05753452283478156	0.6823861781984368	1.89_104.5192m/z	-0.8776434313803131	0.3814868919454487	0.9868301756981082	4354055901918230	4296713750689350
10452327	-0.014716258468602157	0.9167036098188664	0.70_104.5233m/z	-0.8887116408308358	0.3755263660104568	1.00191e+16	5170048915552010	5.17993e+16
10452823	0.02185659538868111	0.8765511668697066	0.67_104.5282m/z	-0.034999689264561484	0.9721247325845432	0.9198252362349628	1.05854e+16	0.9736724956234492
1049585	0.24162886849954165	0.08132142002266445	0.53_104.9585m/z	0.11513042461640045	0.9084898029199568	0.989946640842093	3751118977249710	3.71341e+16
10499223	-0.19864933006795288	0.153879936976491	0.80_82.0030n	-0.19886125645416436	0.8426302182381868	0.9990171269428908	6677212538648760	6670649686347930
10407555	-0.04755694946795115	0.7352459744800846	0.76_1040.7555m/z	2.79494e+16	0.005843014849122686	1.57135e+16	0.489582661056183	0.7693054586753921
104079413	-0.20231831505601533	0.14626525492218334	0.75_1040.7941m/z	-0.8489043898420288	0.39723527344542187	0.9965213532104282	788048677422464	7853073344207220
104129517	0.0654772705561915	0.6413475311921526	0.74_1041.2952m/z	-0.5227281751560183	0.6019050231712549	1.46731e+16	0.11892039343707148	0.17449301736683456
104280018	-0.1711117833993083	0.22054980741231056	0.76_1042.8002m/z	0.2115067784283752	0.8327679072960448	1.00583e+16	1.07329e+16	1.07954e+16
104313495	0.06338070770587009	0.6520834857226723	0.76_1043.1349m/z	-0.3729737656153089	0.7096742602112782	1022622373258720	5291249623089880	541095024706849
10434688	-0.0836979542564151	0.5512769834672595	0.76_1043.4688m/z	-0.7712809283383301	0.4417071056672567	0.9339754774547532	288875039178331	2.69802e+16
104679246	-0.2474787063659875	0.07399947790817248	7.66_1046.7925m/z	-0.14558449092336942	0.8844373526406474	0.6629704063332295	2.48836e+16	1.64971e+16
104704308	-0.08556314531217203	0.5424087992397664	7.65_1047.0431m/z	-0.3987723968158116	0.6906062255475613	0.6210970720507945	3.35968e+16	2086687776324260
104812519	-0.03814131646930859	0.78627532841575	0.77_1048.1252m/z	0.1239968308958802	0.9014774087018242	1.02567e+16	7030647315793660	7211145961437560
10503198	0.07400476294948237	0.5984443414165302	4.62_105.0320m/z	-2.33068e+16	0.02105083864889561	0.5741516305835512	0.9098245986525828	0.5223772768614054
10503346	0.20453583345539372	0.14180069533486614	1.52_208.0524n	2.28301e+16	0.023780265552269458	1.01058e+16	5717479008048570	5777955625435180
105.03346*	-0.040116923770572986	0.7754861044676481	1.36_105.0335m/z	0.30933241612112594	0.7574814481852458	1.00132e+16	5921974177215320	5929815047455910
105.03346**	-0.1302691263343933	0.3525112158105471	1.07_105.0335m/z	-1.72367e+16	0.0867494518063165	0.9943712779738476	547555755376242	5444737162354090
10503347	-0.07184759613986037	0.6091777811800139	4.62_105.0335m/z	-2.43434e+16	0.016047312949400847	0.9657343367007036	9260587830110120	8943267645570000
105.03347*	-0.04910795291714362	0.7269413048886522	0.56_105.0335m/z	-1.75396e+16	0.08140192295439602	0.9932885159185612	6.4558e+16	6.41248e+16
10503683	0.11497126841004073	0.4123481494631059	3.58_105.0368m/z	-1161500625595840	0.24721246000056865	0.8374456559630948	2.44407e+16	2.04678e+16
105.03683*	0.09043443217828663	0.5195785616273876	1.38_105.0368m/z	-1.5703e+16	0.11837206130986976	1.00034e+16	3529855312361180	3.53105e+16
10503843	0.04273762733347475	0.7612388213424387	3.95_105.0384m/z	0.590034028449794	0.5560215210397115	0.9876662903017064	3636544935649440	3.59169e+16
10504318	0.17341343454140618	0.214310786678576	1.05_105.0432m/z	-0.998468499939957	0.31959846679074844	0.8225764637761349	1.48267e+16	1.21961e+16
10504444	-0.060540662201213374	0.6667385614467216	4.61_105.0444m/z	-2.81802e+16	0.005458091885945023	0.7519038336837734	2.39727e+16	1.80252e+16
10504468	0.06833988521720727	0.6268059068740077	9.45_105.0447m/z	0.5104790130909687	0.6104374922194916	1.00038e+16	4949967617505330	4951829109595400
105.04468*	-0.2362261873083288	0.0885794429769098	9.88_105.0447m/z	-1670353200843920	0.09685468322747594	0.9958692144793094	3.15854e+16	3.1455e+16
10504985	0.16930430266336335	0.22553707432887196	1.40_105.0499m/z	0.2569713725859485	0.7975394856849601	0.9652663492859797	1.43234e+16	1.38259e+16
10505616	0.11579477896390515	0.4089856813143199	1.40_105.0562m/z	-1.78879e+16	0.07558910080384777	0.9938689927069242	5093682203253420	5062452800516660
10506676	0.17695796827039684	0.20494602415916197	3.74_105.0668m/z	-0.9239704306992138	0.35692868501411024	0.9982447744799776	7745958822636820	7732362918034290
10507304	-0.1121683736094378	0.42391111211304455	0.97_105.0730m/z	-0.7324953512903221	0.464965407695882	0.7903561018936733	1709756604466270	1351316565092920
10507391	0.0872467142203452	0.5344638744432966	1.23_105.0739m/z	-1.47765e+16	0.14151696323262328	0.613241363657009	1.6126e+16	0.9889108115977095
10507393	0.09914323171039094	0.4799979811263954	1.65_105.0739m/z	0.6448942954071406	0.5199429378730935	1023261169803070	2.9197e+16	2987619726037620
10510399	0.25840187385438224	0.06173372163379697	9.03_105.1040m/z	-1782105645628140	0.07667723577535042	0.6410280083724451	1089593002105150	0.6984596320760201
10511027	0.08108053638454503	0.5638370924357647	0.86_105.1103m/z	0.4573813901042831	0.6480332751451887	0.9988984020844072	943075077843439	9420361883034390
10511312	0.03527870180829283	0.8019790931671379	0.86_104.1058n	-0.5223305197770519	0.602181166035359	0.9938396244452116	6509287820957150	6469188163385850
10547293	0.16091119876216764	0.24971695220953435	0.71_105.4729m/z	-0.03931717235592447	0.9686877871168262	1.13121e+16	3.33286e+16	3.77016e+16
10550897	0.18574740483520585	0.18297896392890006	1.35_105.5090m/z	-3.37814e+16	0.0009216593965297383	0.9112606120558656	4.37791e+16	3.98942e+16
10551683	-0.1568793471269342	0.26193533266567465	1.27_105.5168m/z	0.7534364031627656	0.452323321959789	1.07774e+16	2.32973e+16	2510833477211870
10551982	-0.010079629088083669	0.9428941360476496	8.58_105.5198m/z	0.5594378039955679	0.5766652795628997	1.03085e+16	3.83493e+16	3.95325e+16
105.51982*	-0.08841850636066992	0.5289679180638112	0.53_105.5198m/z	1.53871e+16	0.12590116815271385	1103385584044910	3597776285617290	3969734488168780
10595373	0.03943150899258329	0.7792246566360922	12.49_105.9537m/z	-0.4634866021099338	0.6436616234185134	0.9977575491076556	1.08322e+16	1.08079e+16
10595375	-0.0801532105084413	0.568318876610548	0.50_105.9537m/z	0.9066668724124974	0.3659813123100639	0.9653462530628726	50108386076603	4837194274607650
10596293	-0.12361657113625807	0.3778460206090161	0.71_105.9629m/z	-2.02293e+16	0.044788778019993335	0.9868432192584908	5788554508063950	5712395765591080
1060368	-0.002298155432083076	0.9869696207021754	5.85_106.0368m/z	-0.9449199250407988	0.3461609832658133	0.996845202598694	4364479891556380	4350710841736450
106.0368*	-0.08583040391050381	0.5411437756537947	8.78_106.0368m/z	1.23709e+16	0.2179111424077287	1.05836e+16	0.17473053422297918	0.1849270183823808
10603681	-0.030964620558593024	0.8257907627790169	6.93_106.0368m/z	-2190268947644050	0.029989183649516093	0.9642730441610248	2.88104e+16	277811296107971
10604129	-0.18780364916917489	0.17809401692880752	1.51_106.0413m/z	-1.05019e+16	0.2952565447378701	0.9705462193949492	2132913634411690	2.07009e+16
10604866	0.10704566091544854	0.4455126125336575	1.40_106.0487m/z	-2.03647e+16	0.04339485646986285	0.9848638519431496	5193327671423680	5.11472e+16
1060498	-0.3195242420922522	0.01968983120613839	0.80_122.0691n	0.3614024773004673	0.7182875965967104	1.00882e+16	7695926243305590	7.76379e+16
10606508	0.022941235804478426	0.8704762337855656	3.31_106.0651m/z	3.25841e+16	0.0013751172024731224	1.07606e+16	509562919538679	5483205717088340
106.06508*	0.08640258054305319	0.5384402910375179	3.82_106.0651m/z	-1829497933442010	0.06923421421225924	0.9695586215174216	3.22983e+16	3.13151e+16
10607303	0.20485838158621245	0.14115985985740698	3.74_105.0658n	0.7786260594076948	0.4373794682399906	1.00087e+16	9400622749773580	9408799406166820
1060862	-0.3970164305214394	0.0032460485345599463	1.24_106.0862m/z	1.03524e+16	0.3021606666678887	1073334469251770	2613348734846730	2804997277286520
10608621	0.3654470322175614	0.0071276368860443	0.89_106.0862m/z	-3733723092575230	0.0002639719093432956	0.9524263629337648	6698061043278850	6379409918158410
10648944	0.23481503923599706	0.09055622489921604	0.71_106.4894m/z	-0.5854175147587528	0.5591129071374872	1.11459e+16	338339714160544	3.77109e+16
10651999	-0.10983649525427312	0.43366958879824014	0.53_106.5200m/z	164526741243089	0.10192811696692528	1.09998e+16	2.53202e+16	278517836893561
1069045	0.06813829263544557	0.6278254562223052	12.15_106.9045m/z	-0.5650693735641371	0.5728382973218882	1.03651e+16	7659647779064660	7.93929e+16
10695052	-0.02213486547743173	0.8749919240967414	0.77_83.9613n	0.7432390671373477	0.4584547994266562	0.9972381752189624	9509241415591920	9482978557001470
1069571	-0.3812115721113243	0.004858229302875377	11.07_106.9571m/z	-0.5977961794643185	0.550842758168365	0.8822401671419609	2999214326992190	2.64603e+16
10699189	0.22005846225104256	0.11334719188280515	1.55_106.9919m/z	0.37628275192598737	0.7072179597314154	1.00318e+16	6336986548920350	6357132984551020
106.99189*	-0.006330007067316543	0.9641194997878106	2.58_106.9919m/z	-0.2970153891026359	0.7668498710288683	1.00221e+16	5.55073e+16	5562987234054510
106.99189**	0.0654772705561915	0.6413475311921526	1.05_106.9919m/z	-1050218602170780	0.2952418316096576	0.9986212633095134	5052130959692810	5.04517e+16
1069919	-0.1600645099187686	0.2522501912629159	0.67_106.9919m/z	-2.9909e+16	0.003233687949082943	0.9757917593589392	7845284028118880	7.65536e+16
10701607	-0.15050902154326531	0.2820449947729769	1.07_107.0161m/z	-2215206641022620	0.02819472229733237	0.9437056316791969	4288364835977160	4046954046406680
10701962	-0.14385646634513005	0.3041025228821229	1.09_107.0196m/z	-0.4897810367604222	0.6249768999433616	1.00222e+16	1404424322913360	1.40755e+16
10704015	-0.06688332551320413	0.6341878681294604	4.62_107.0402m/z	-2.47801e+16	0.0142770612488462	0.8003798980714396	2273909219040810	1.81999e+16
10704905	0.32976514524574524	0.015893333374120758	3.28_107.0491m/z	-2.18667e+16	0.0302565345138836	0.9839650258090292	6650982058468100	654433373281596
10704909	0.43854450236434417	0.0010211773586513704	6.03_107.0491m/z	0.7161485153809323	0.4749703129370455	1.01412e+16	661997100063481	6.71343e+16
107.04909*	0.4121761926699173	0.002164171931177145	7.83_107.0491m/z	-1.42107e+16	0.1572931258811001	0.9918364726331684	6542332886225720	6488924372666090
107.04909**	0.0616470115027197	0.6610145655202331	11.06_107.0491m/z	0.11170405164510634	0.9112016640693716	0.985104267572404	4.43552e+16	4369448084315490
107.04909***	-0.11196451991043337	0.42475919732678397	11.18_107.0491m/z	-1.60742e+16	0.10998520473330607	0.9872401156288666	4307738778259590	4252772529547950
10704911	0.13809091850674626	0.32409409229794706	3.76_107.0491m/z	-0.6503503916741566	0.516422552300111	0.9952696928546388	7380918325937720	7.346e+16
10705223	-0.051289288532832385	0.7153142687662403	0.98_107.0522m/z	-0.00741872200572456	0.9940902491777376	0.8185393558408148	1060280717627770	0.8678814956174761
10707022	-0.006773510747192223	0.9616074010914972	4.89_106.0629n	-0.968150233763854	0.3344679293752352	0.988235459011732	8458407561778560	8358898279322540
107.07022*	0.09390182458458744	0.5036264341435068	5.07_106.0629n	-0.6403884207444465	0.5228596138102087	0.995176824795029	8605471795499810	8563966097308680
1070793	0.2605382526687866	0.05953747287459834	3.74_106.0720n	0.8750552998769086	0.3828890811947212	1000318630638940	1.01727e+16	1.01759e+16
10708547	-0.02435238387681014	0.8625837102104944	4.95_107.0855m/z	0.11490313592917108	0.908669661433092	1.00182e+16	8262248117923910	8277278465536320
107.08547*	-0.15655679899611552	0.26292981856545417	2.23_107.0855m/z	-1.4155e+16	0.15891641016010954	0.9974180069406148	7575187159048590	7555628078380380
107.08547**	-0.10406209070537577	0.4583688622343983	4.17_107.0855m/z	0.4638601446124158	0.64339454914857	1.01217e+16	7579933264666100	7672174217391280
107.08547***	0.048019352975630585	0.7327668951974182	5.55_107.0855m/z	0.2903791979565306	0.7719118072599944	1.00293e+16	7721255255467470	7.74391e+16
10708548	-0.05035782692406599	0.7202715217111914	1.81_107.0855m/z	-1438954819139060	0.1521667201418045	0.9951937846731798	7688965995674050	7652011169458240
1070855	-0.03427073889948447	0.8075274616263648	4.63_107.0855m/z	-0.3251491389944887	0.7455038584806035	1.00089e+16	760491639747481	7611700791187140
10715596	-0.019312569332768304	0.8908270452322374	0.59_107.1560m/z	-0.7483248414844936	0.4553909483587844	0.9777100419771304	3.44321e+16	3366465869899630
10751729	-0.13801028147404154	0.3243794521371013	0.55_107.5173m/z	0.4999772014951875	0.6177956498195347	1.04008e+16	4480019286025370	4659592263627670
1075229	-0.2650539265002481	0.05510211891143377	3.47_107.5229m/z	-1158593273813600	0.2483925435783675	0.8401348185801818	2537128654010020	2131530121451290
1075498	-0.08450761027449344	0.5474189328647403	4.51_107.5498m/z	-0.05014076582529288	0.9600743557020096	0.9294826478403704	3243643561023950	3014910405750910
10795035	0.08902328410595495	0.5261423403120267	2.90_124.9536n	0.7333852235551016	0.4644241876949181	1.00016e+16	8394454363904160	8395816314105560
107.95035*	0.02443302090951481	0.8621331030693542	2.48_124.9536n	0.7631782308586589	0.44650968040826094	1.00425e+16	6.93609e+16	6965579558272590
10795036	-0.17296643515151572	0.21551268697959744	1.07_107.9504m/z	-1.90687e+16	0.058375677960286684	0.9963393114782664	6102417151911090	6.08008e+16
10795037	-0.0008466888433990279	0.99519915498418	2.28_124.9537n	-0.26308411926967074	0.7928328926873458	0.9980931791584772	7451371732373110	7437163301455890
107.95037*	-0.11704465297082756	0.4039127004304521	1.96_107.9504m/z	-2120023964965000	0.03558612648832254	0.9944593047491972	6949292386446220	6910788475124190
107.95037**	-0.09801431325252556	0.4850370867274375	1.33_107.9504m/z	-1.56874e+16	0.11873564478089625	0.99694234951242	6.63898e+16	6618682551991800
10796675	0.12031045279536665	0.3908312226522359	11.91_107.9668m/z	1.33326e+16	0.1843905475442408	1007582317107970	1.03014e+16	1.03795e+16
10802272	-0.08785404713173724	0.5316118658154358	8.59_108.0227m/z	0.7812166376573546	0.4358590369416091	0.9985357858068766	8151680106349260	8139744300639740
10802273	-0.03636730174980587	0.7959977256696928	13.00_108.0227m/z	-0.18157169843690574	0.8561545680234943	1001131867849770	8752165180294400	8762071474677860
10802274	-0.12535026733940846	0.3711410673828884	0.53_108.0227m/z	0.7632929267024938	0.4464414899620613	1078258633794410	5.14147e+16	5543833983285980
10804431	0.2130430404057364	0.1256121820851391	1.06_108.0443m/z	-0.12990051398688193	0.8968124832767791	0.9955553117411888	4244968364825900	4226100803775740
10804432	0.12442294146330478	0.3747184793379907	6.22_108.0443m/z	-1.01559e+16	0.3113988550840147	0.9969861121432454	373206955915182	3.72082e+16
10804433	0.0070557403616585655	0.960008983830422	4.11_108.0443m/z	1.56011e+16	0.12075964668788122	1082416751396350	4375410723402850	4736017861250480
10805244	0.12234405611793454	0.3828131478397117	8.62_108.0524m/z	-2.27769e+16	0.024103195194545037	0.0	0.3891855889808981	0.0
10806813	-0.1495847110319965	0.28504500024693125	0.54_107.0609n	-0.781558043632378	0.4356588927509372	0.9153869656971112	6012325214329230	5503604134729070
10808071	0.07011389993670998	0.6178638568392274	3.43_108.0807m/z	-0.2569800061457554	0.797532832869585	0.9987545365291698	9540811342557030	9528928610547800
10808556	0.29158351026008433	0.034139960089379834	3.74_108.0861n	0.5179546175352432	0.6052237126539737	1.00098e+16	9070439023543580	9079360764228310
1080888	0.05826025612912359	0.6785961190789682	3.75_108.0888m/z	1.91565e+16	0.05723912275573174	1.01807e+16	2.58678e+16	2.63352e+16
10812584	-0.10462842200074368	0.4559131268141722	3.99_108.1258m/z	0.3849116087975625	0.7008271696185049	0.9318074474017408	1.23893e+16	1.15444e+16
10851254	0.18377179753394146	0.18776239652612706	2.01_108.5125m/z	-0.1713919898506279	0.8641376702765347	1.01543e+16	3606642231740050	3662279750784630
10851743	-0.10640056465381116	0.4482753214615763	12.99_108.5174m/z	-0.6967021702729072	0.4870260467885308	1.00301e+16	8193319372761700	8218020201071680
108.51743*	-0.12071363795889	0.389233732062345	0.55_108.5174m/z	-0.4404944764350184	0.6601887835051112	1.00052e+16	7648066025922890	7652043762517910
10852278	-0.06539663352348682	0.6417591277702495	12.97_108.5228m/z	0.09969825330966336	0.9207118922627168	1.00352e+16	4650308220095260	4666662712683310
10852439	-0.00838625140128561	0.9524757927055391	12.76_108.5244m/z	0.1546870393491344	0.8772680003065059	1.00527e+16	4.58031e+16	4604462227105550
108.52439*	0.01278096968369009	0.9276262450157896	12.24_108.5244m/z	-0.14221331152734054	0.8870950209326315	1004597329796080	4.05977e+16	4078430941869940
108.52439**	0.07523435151345649	0.5923637740110973	12.85_108.5244m/z	-0.19118555909548607	0.8486288189904694	0.9192973435153632	2722215725422160	2.50253e+16
108.52439***	-0.2370325576353755	0.0874650981598792	11.24_108.5244m/z	-0.06617511385379082	0.9473231411232316	0.8927619769560476	2.02783e+16	1.81037e+16
108.52439****	-0.023102509869887763	0.8695735824619554	11.21_108.5244m/z	-0.07606862982471782	0.9394619646836488	0.910005637328703	2.82279e+16	2568752145412440
108.52439*****	-0.15075093264137931	0.2812632747732462	11.01_108.5244m/z	0.4962252443632928	0.6204339499296189	0.9698736217042622	1.87866e+16	1.82206e+16
108.52439******	0.10298179474280963	0.4630731539216754	11.78_108.5244m/z	-0.24711101028859	0.8051472223765817	0.8802260723549283	2357406258826340	2.07505e+16
108.52439*******	-0.10730920562578686	0.4443866626024573	10.64_108.5244m/z	-0.2785874729933578	0.7809303660391393	0.8436973405636992	1.85993e+16	1.56922e+16
1085244	-0.09567583930409017	0.4955630303037104	8.74_108.5244m/z	1.21016e+16	0.22804769927599344	1.11041e+16	2116015181063470	2.34965e+16
108.5244*	-0.023626650582468114	0.8666411100774105	8.89_108.5244m/z	1.22073e+16	0.22402892989046616	1.08629e+16	2.19518e+16	2.3846e+16
108.5244**	0.05471222669011814	0.6971985684288132	8.49_108.5244m/z	1.36001e+16	0.17579019749395502	1.10753e+16	1.01876e+16	1.1283e+16
108.5244***	0.10801330530790457	0.4413862577626512	9.05_108.5244m/z	19161237322633	0.05717814435325795	1.09883e+16	0.499709487510955	0.5490962080388262
108.5244****	0.06894466296249227	0.6237514127109816	9.34_108.5244m/z	0.5523733726635811	0.5814831162715133	1.46738e+16	1.41345e+16	2.07407e+16
10855761	0.1811107754546873	0.19434599048411744	3.90_108.5576m/z	-0.9272503379588236	0.3552289413837684	1.02538e+16	2131649046392730	218574432029663
10893984	0.2627960895845173	0.057285169293732535	7.14_108.9398m/z	0.5482941361267734	0.5842737225127653	1.01271e+16	4.89815e+16	4.96039e+16
10893985	0.014393710337783475	0.9185230445766136	6.48_108.9398m/z	-0.9680852520346744	0.3345002754725266	0.9940619468149552	566236624786119	5628742815928180
108.93985*	0.2347747207196448	0.09061320612333354	5.96_108.9399m/z	1.11738e+16	0.26554939545398176	1.01525e+16	4078163034853480	4140356597644000
10894867	-0.04064106448315335	0.7726306093354576	0.77_85.9595n	0.7515485865074639	0.4534548913382464	0.9964791563772626	7121972745698360	7096897393375360
10895824	-0.34415885558352866	0.01162344459207375	0.56_108.9582m/z	0.40704791801495255	0.6845307548306575	1027227282721920	1.87749e+16	1.9286e+16
1089614	-0.13434129648597912	0.3375310366804285	0.55_108.9614m/z	-1.36312e+16	0.17480886412249622	0.9939227615600096	6190778738644250	615315590012029
10896142	-0.08241104742417205	0.5574357175053889	8.58_108.9614m/z	0.8833888293181621	0.37838555911071	0.991478400968624	7.60115e+16	7536377408811560
10896143	0.02652958375983621	0.8504330024772375	8.68_108.9614m/z	1.31699e+16	0.18977273874094425	1.00616e+16	6855829387215770	689804041162187
10901602	-0.3607297658043383	0.007965560034784599	10.95_109.0160m/z	0.3919951097945621	0.6955968225105099	0.9843696888557658	2.08072e+16	2.0482e+16
109.01602*	-0.2625944970027557	0.0574834303651422	11.22_109.0160m/z	-0.21118293493737225	0.8330201503612923	0.9466514840342256	1.78353e+16	1.68838e+16
10901603	-0.04439068650392047	0.7522919742797212	12.17_109.0160m/z	0.12378874034621155	0.9016418997062374	1.00268e+16	2.40862e+16	2415074453904220
109.01603*	0.026045761563608192	0.8531302860333563	12.77_109.0160m/z	1400528352926440	0.16334104519479326	0.992939603992386	2.53841e+16	252048788766486
10902233	-0.11950408246831995	0.3940377720826676	8.59_109.0223m/z	0.5209533965820276	0.6031379235372496	0.9989872295122092	1.15818e+16	1.15701e+16
10902834	0.0741054330555911	0.5979454756507426	0.83_126.0316n	0.2954626552873256	0.7680333702530511	0.9998178970660118	8178582271227980	8177092927400520
10902836	0.21046265535918696	0.13036730360793702	2.69_109.0284m/z	1.26504e+16	0.2077429865723988	1.00413e+16	426898957069057	428663564019285
10902837	0.20328595944847136	0.14430442097280807	0.93_109.0284m/z	0.1020864166990144	0.9188191846912844	0.9960108557019764	7408408370768220	737885516075854
10902838	0.334079226495445	0.014491912136181815	1.29_109.0289n	0.7384397285948265	0.4613567637201589	1.00849e+16	5092824958925510	5136068841161990
109.02838*	0.21054329239189165	0.1302166839224859	1.59_109.0284m/z	-0.946838574309245	0.3451853785194836	0.9962110649370578	4188218548127530	4.17235e+16
10902839	0.01782078422773192	0.8992145382756682	1.85_109.0284m/z	1.35571e+16	0.17715065305357006	1020272948517820	531418789026754	5421922147780970
109.02839*	0.10265094263304406	0.4645190983573833	4.24_109.0284m/z	-0.8911245643177637	0.3742346935735107	1011353683208400	2.1962e+16	2.22113e+16
10902843	0.2300977728227739	0.09741505541803297	4.52_109.0284m/z	-3.66023e+16	0.00034438343991794433	0.808210323087505	4231357725794670	3.41983e+16
10904658	-0.2817457922701146	0.04096945992638396	4.31_109.0466m/z	0.4759815039931095	0.6347534614296348	1.0248e+16	3.13756e+16	3.21536e+16
10905219	0.05987366907597419	0.6701985734164898	4.15_109.0522m/z	2026491976252440	0.04441794107252968	3639240293143100	1.2459e+16	4534123608564000
109.05219*	-0.03523371059828271	0.8022265446431258	2.18_109.0522m/z	-3.01295e+16	0.0030197997792944698	0.6740450696144105	1.65637e+16	1.11647e+16
10906476	-0.020159258176167337	0.8860717841499888	3.83_109.0648m/z	0.5686105881880316	0.5704380826304506	1011698923208520	6312923450685370	6.38678e+16
10906477	-0.34403790003447177	0.011654729251726469	7.26_109.0648m/z	4165501810283720	5.12766e+10	1014166039890800	682999576648195	6926749758963970
109.06477*	0.025440983818323173	0.8565042313895554	5.15_109.0648m/z	-0.0002931637769334229	0.9997664637063296	1.01002e+16	6369712330087560	6.43353e+16
109.06477**	0.20647112224030584	0.1379880416558417	5.44_109.0648m/z	-0.9647103102359846	0.33618302590294313	0.9926105653227456	6407005984417170	6359661832218540
10907595	0.2475153718869825	0.07395529301581419	0.81_109.0760m/z	-1.21978e+16	0.22438974274271165	0.9981007839646464	4851941198791180	4842726314263850
109076	0.08023384754114599	0.567928500973495	1.31_109.0760m/z	0.5252697816431032	0.6001414248992404	1.02799e+16	4825376179926540	4.96043e+16
10907601	-0.22844471365232816	0.09991164063945833	4.20_109.0760m/z	-0.5706710614076292	0.5690437361004066	0.9975180779988592	5816983176208290	5802545877682990
10910116	0.22102610664349864	0.11172994822956467	5.61_109.1012m/z	-1.66151e+16	0.09862035929224104	0.9948969984129326	8787586476385730	8742743408650240
109.10116*	0.15655679899611552	0.26292981856545417	4.87_109.1012m/z	-2.1602e+16	0.032284248549339416	0.98490554873417	8585221386527260	8455632180701960
109.10116**	0.18985989350314392	0.1733039488041062	8.51_109.1012m/z	-1.88807e+16	0.060873710659712914	0.9917014429572616	8305770675776320	8236844764039490
109.10116***	-0.0018949702685597289	0.9892555038177272	5.99_109.1012m/z	-1.5343e+16	0.1269826347955006	0.9959045269625784	8132642459904610	8099335441987080
109.10116****	0.0950307430424528	0.4984874164506615	5.15_109.1012m/z	0.18177844167920948	0.8559925873880481	1.0086e+16	7003107287592340	7063356521545980
1095152	0.030238887264250995	0.8298124112809012	3.66_109.5152m/z	-0.1208747002879681	0.9039458290359212	1001537805194040	7423012152861050	7.43443e+16
109.5152*	-0.05092228615299868	0.717266083910327	5.17_109.5152m/z	-0.7746462749006244	0.4397212303371796	0.998993445789892	6941614804485150	693462769287875
10951521	-0.03040016132966034	0.8289183338412213	0.55_109.5152m/z	0.10145321737862968	0.919320973715892	1005351921912230	6979779243426970	7.01713e+16
10951523	-0.06398548545115511	0.6489792663287652	12.99_109.5152m/z	0.039194711118099794	0.9687852649692668	1.00035e+16	8827056389237090	8830128386321290
1095204	0.25512055500133635	0.06523322405152303	1.95_109.5204m/z	0.3346965460635869	0.7383035923461849	1.13951e+16	1.97315e+16	2248431206219870
10952155	-0.00770083662329592	0.9563560543478472	0.50_109.5215m/z	0.6765980799584222	0.4996629710088082	1217525811516860	6.86261e+16	8355406146253610
10953859	0.16111279134392933	0.24911635103211344	1.31_109.5386m/z	-0.48023672377778	0.6317317925078831	102209497624139	2.83856e+16	2.90128e+16
10994765	-0.04164902739196171	0.7671476898253581	1.54_109.9476m/z	-0.7139437445950473	0.4763287923796412	0.9978271858616876	1.87115e+16	1.86708e+16
10996153	-0.17994153848046962	0.19729015488644933	0.60_109.9615m/z	0.39952119987890816	0.6900556560010492	1.05443e+16	1.52859e+16	1.61179e+16
10997861	0.016651547253514216	0.9057962099519592	0.70_109.9786m/z	1.31354e+16	0.19092913638924	1.03682e+16	5281054690821970	5475479691224350
11000709	-0.10853744602048493	0.4391600482103367	0.71_110.0071m/z	-0.15745046085862394	0.8750934551223495	1.02146e+16	3.38015e+16	3.45271e+16
11001237	-0.04382622727498778	0.7553434324094948	1.23_110.0124m/z	2500159217448640	0.013447511267964618	1021092393977600	5799304959260990	5921626184258010
11001533	0.3206531605501176	0.019236807341731516	3.98_110.0153m/z	1.02641e+16	0.30628938167985376	1.10594e+16	2.35413e+16	2.60354e+16
11001685	-0.01806269532584593	0.8978536375913883	3.53_110.0169m/z	0.4344425117720941	0.6645674494726712	1.01191e+16	3159497414238100	3.19712e+16
11001686	0.08906360262230728	0.5259542349110639	4.11_110.0169m/z	0.9518327158072948	0.3426542409520298	1.00954e+16	3.30268e+16	3.33419e+16
11001687	-0.01959479894723465	0.8892415264268373	3.96_110.0169m/z	0.4932612349536662	0.6225216755845121	1.01323e+16	3886750915571720	3938189882127270
110.01687*	0.07233141833608839	0.6067632004092272	4.46_110.0169m/z	-0.5958262994642276	0.5521547539566839	0.877103913330404	2.32355e+16	2037991408060170
110.01687**	-0.01528071769753484	0.9135206228916364	3.82_110.0169m/z	-1286068465809000	0.20032472925710226	0.964353503065956	2.95031e+16	2845145867981920
110.01687***	-0.025118435687504496	0.8583047137974399	4.24_110.0169m/z	-0.028905594730215645	0.9769768295490884	0.9420002165544504	2516763409589050	2.37079e+16
11001689	0.09978832797202827	0.4771309778828149	4.59_110.0169m/z	0.37328501081418936	0.7094430888286722	0.9157707288721902	2.11251e+16	1934573328765150
11001693	0.13170682659670044	0.3471764316339017	4.48_110.0169m/z	-0.16080321693330202	0.8724564402375963	0.8027248981859184	1.5988e+16	1.28339e+16
11001997	-0.0987400465468676	0.4817944753761666	13.00_110.0200m/z	-0.5693709455701277	0.5699233484838907	0.9952621401502264	141799918371552	1.41128e+16
110.01997*	-0.1191008973047966	0.3956468227761605	8.59_110.0200m/z	0.5125757718790453	0.6089731001491179	0.9989313172096596	1.43198e+16	1.43045e+16
11001999	-0.0522124786762734	0.710412503296024	0.50_110.0200m/z	0.6874932434669175	0.4927928161164421	1078816354481930	9579866671196450	1.03349e+16
11002118	-0.16072404477183708	0.2502754147075725	0.83_110.0212m/z	0.49178415221622296	0.6235632183636097	4385643342473130	0.3325912451804518	1.45863e+16
11003483	-0.09418405419905378	0.5023391409161119	1.85_110.0348m/z	1.13157e+16	0.2595534933038019	109453575131827	3.67571e+16	4023200670803260
11005999	0.0025803850465494185	0.9853695631891192	4.15_109.0527n	1821669052909120	0.07042074659832688	1.04497e+16	6043495638311340	6315245771923450
110.05999*	0.0022175183993784066	0.9874267896051468	3.69_109.0527n	0.8795585951819354	0.3804513518767068	1.11675e+16	5043449254376110	5632263656536470
110.06	0.30367906516578475	0.027064037126016884	1.20_110.0600m/z	-230576860470856	0.022440581016159384	0.8877805008001467	7424480484110050	659130900236414
110.06*	0.06999294438765298	0.6184718195874185	1.68_145.0739n	-1.83376e+16	0.0685956774487305	0.9887601319589124	7193588158591130	7112733176946630
110.06**	0.17490172393642778	0.21034287246357397	3.86_109.0527n	-1.87787e+16	0.062265829340227674	0.9913746366528589	680890108849424	6750171842611230
11006001	0.13333333357717073	0.34120150175897435	2.20_110.0600m/z	-3.79474e+16	0.0002110600428851764	0.9725003370804522	8303281781787090	8074944331661920
11006794	-0.11289412153358225	0.42089962109860624	3.73_110.0679m/z	-0.2282134407712209	0.8197791760358851	0.9215425306015436	4.17998e+16	3.85203e+16
110.06794*	0.02100594701956636	0.8813205001316523	3.26_110.0679m/z	0.33174307632964456	0.740528538469619	1.00445e+16	4513465996367140	4533571019661910
11006808	-0.08926519520406895	0.5250142084903358	2.26_110.0681m/z	1.54065e+16	0.12542917729581307	1.04703e+16	1.49992e+16	1570456258142450
1100681	-0.2827940736952753	0.04019209989938368	1.97_110.0681m/z	-0.3587603875538965	0.7202594190582714	0.9647140337239604	0.8440608259167184	0.8142773240784948
11006811	-0.2441286165133864	0.07812574958531539	4.14_110.0681m/z	-0.7351776813269371	0.4633350908000723	1.01309e+16	1.7041e+16	1.72641e+16
11007121	0.18566676780250116	0.18317247404273587	0.80_110.0712m/z	0.2826605741976464	0.7778117391519541	0.9984424595174596	8127215726230530	8114557258726590
11009638	0.2700131040115853	0.050543069735110184	1.18_110.0964m/z	-0.5888123267359592	0.5568387972226044	0.9521220045487774	3.51306e+16	3.34486e+16
1100964	-0.03781876833848991	0.7880406808413922	2.53_110.0964m/z	-1.80111e+16	0.07361685630008821	0.9720471640700828	1.83361e+16	1.78236e+16
11010122	-0.02705372447241656	0.8475128613602141	3.74_110.1012m/z	-0.36693741140558295	0.7141629594231349	0.9981466189732668	613093087029047	6.11957e+16
11010123	0.16276585051437506	0.24422837769978145	3.99_110.1012m/z	0.6191520252561599	0.5367193523637106	1.02049e+16	4153299657187430	4238399804440970
11010448	0.2225582102648873	0.1092055108705665	9.80_110.1045m/z	-5305148660340230	3.79998e+09	0.950416722310636	4996795226023620	4749037740774800
11051398	-0.1430500960180834	0.3068496781249254	0.55_110.5140m/z	-0.1751156411296798	0.8612158492913745	1.01844e+16	4931909405203400	5022843371548340
11051855	0.0759600848077985	0.5887878318064155	13.00_110.5186m/z	-0.4303069613110088	0.6675662402425253	0.9848655982289382	7651767777950340	7535962850139980
11052821	0.18078822732386865	0.19515503073416846	2.13_110.5282m/z	0.8714983726459768	0.3848213357155783	0.9871883285953468	2582338542645790	2.54925e+16
11095322	0.08801532119714657	0.5308557895421239	13.00_110.9532m/z	-0.014978007222590118	0.9880688645804756	0.9908739693113128	3218165799123750	3.1888e+16
110.95322*	-0.20977724058119726	0.13165287066778653	12.60_110.9532m/z	-0.5659312452195652	0.5722536803494926	0.9580096762482104	1.99676e+16	1.91291e+16
110.95322**	-0.2773510739877102	0.04436407155236129	0.62_110.9532m/z	-0.1941941051340523	0.8462765481409796	1.00146e+16	3.40131e+16	3.40628e+16
11095555	0.06656587049770453	0.6358014859400838	1.04_110.9555m/z	-2258683037467690	0.025289039224355655	0.9767468474588604	409243016059917	3997268257810790
11097529	-0.02229613954284107	0.8740884652880676	1.24_145.9891n	1.93074e+16	0.055328983604833015	1017413718948120	7711008726737230	7.84529e+16
11100602	-0.00647729060853815	0.9632852151234708	1.84_111.0060m/z	3.94725e+16	0.00011929827718951617	inf	0.0	0.034063297013732174
11100764	-0.030382002903546656	0.8290189905116605	3.88_111.0076m/z	0.3493800345986269	0.7272751922918627	0.8451357863666226	0.6197581864027503	0.5237798222226402
11100943	0.01520008066483017	0.9139752540914028	3.20_111.0094m/z	0.8768420406537077	0.3819207263045522	0.9993332882768396	5044139566581030	5040776579598730
11100944	0.1232940230054394	0.3791013931037238	0.97_111.0094m/z	-1.55111e+16	0.12290071845569744	0.9936942314179266	4802712758402890	4772427963182230
11101202	0.12817256348407188	0.3603804557788428	2.84_111.0120m/z	-0.5299877473676875	0.5968739429133141	0.8767613534614926	1.68362e+16	1476134348764920
111.01202*	0.2028424557685957	0.14520069581336922	1.97_111.0120m/z	1.8506e+16	0.06611863326985358	1.15931e+16	1.63117e+16	1891035469565410
11101207	-0.16953936126156727	0.22488411005698164	1.01_111.0121m/z	-0.27547354585767275	0.7833169927672574	0.9668748189897928	3.09248e+16	2990043191480320
11102016	-0.0662836408832382	0.6372374638935536	8.76_111.0202m/z	1.71749e+16	0.08787338896357487	1.00685e+16	1.14897e+16	1.15684e+16
11102017	-0.014635621435897484	0.917158429189946	0.50_111.0202m/z	0.6522278412763451	0.5152140743939745	1.14275e+16	9116506996306000	1.04179e+16
11102321	0.14768672539860184	0.2912706432605012	9.40_111.0232m/z	0.6053240739246875	0.5458432791481571	3346556962403540	0.8983873680986558	3006504501645950
11102322	-0.10571514987582148	0.4512210142424298	9.05_111.0232m/z	0.07218248362842597	0.9425491462948355	1.01021e+16	6355924193063280	6420794397629820
11102326	-0.002177199883026072	0.9876553755678722	9.80_111.0233m/z	1.02931e+16	0.30492740478513114	1.01307e+16	0.935550326587802	0.9477819400653916
11102697	0.0385041831164796	0.7842905808582901	3.76_127.0462n	-1.36574e+16	0.17398611896895028	0.9964489799953291	7384007513137490	7.35779e+16
11103906	0.04181030145737105	0.7662714635821577	0.71_111.0391m/z	-0.2499844733200105	0.80292825072861	0.9557431484408748	3.47588e+16	3.32205e+16
11103907	0.03205322050010606	0.8197666275229183	8.16_111.0391m/z	-0.5038827425413034	0.6150546304754398	0.9975772347210696	7831662229162240	7812687949837110
1110417	0.08995060998205863	0.521824372725984	1.78_111.0417m/z	1.23563e+16	0.2184532488799664	1047005603230560	3.6247e+16	3.79508e+16
11105523	0.11587541599660985	0.4086572863373299	1.08_110.0480n	-0.04265142610747608	0.9660339427718236	0.9885303864996072	6237761996563780	6166217277355750
11106332	0.05281725642155841	0.7072076535847873	1.93_111.0633m/z	-1.35218e+16	0.1782737136220308	0.9636527877028112	2.77802e+16	2.67704e+16
11106334	0.3226690863677343	0.018449805245203545	3.64_111.0633m/z	-0.6817496856100392	0.4964081430725712	0.9542632937931828	2.82673e+16	2697442229911910
11106647	0.1024493500512824	0.4654013250763542	11.17_111.0665m/z	-0.22281604363395446	0.8239701555474751	0.9835913436380967	4167338871168140	4098958439687540
11106648	0.002015925817616733	0.9885697290689516	9.95_111.0665m/z	-0.5949131564190955	0.5527634580699006	0.9982178761479054	4243280422366720	4235718371114900
111.06648*	0.018990021201949626	0.8926395851517074	9.62_111.0665m/z	1208997059166050	0.22849318133661956	101757420092877	3.61979e+16	3.68341e+16
111.06648**	0.03697207949509089	0.7926797383394755	10.34_111.0665m/z	-0.3678746718681	0.7134653423115805	0.9854777979056812	3.36863e+16	3.31971e+16
111.06648***	-0.015764539893762856	0.9107934172625024	9.83_111.0665m/z	0.03518941683167274	0.9719736879298246	1019554023664380	2.61935e+16	2670565793207840
11107415	-0.010402177218902344	0.9410699259040104	3.24_111.0742m/z	0.4307184625534687	0.6672676091977803	1.01071e+16	6.53195e+16	6601936070619430
11107421	0.3218627160406877	0.01876126225096661	3.74_111.0742m/z	-0.14392398277463656	0.8857462516124281	1.00072e+16	7618150381499990	7623644496917980
11107455	-0.07870174391975726	0.5753668345015729	0.80_111.0751n	0.2715792153621325	0.7863046458914935	1.00974e+16	553315250967874	5587026555811820
1110804	-4.03185e+11	0.9997713869971986	1.82_111.0804m/z	-0.8712135138968906	0.3849763414593295	0.9987420529373492	7183169777637120	7174133730314820
111.0804*	-0.037455901691318905	0.7900279653635721	2.24_111.0804m/z	-0.755266392014653	0.4512279543531581	100239039624795	6.73742e+16	6.75353e+16
111.0804**	-0.2592883786618643	0.06081460544463465	5.03_111.0804m/z	0.27915068929474457	0.7804989183197176	1000334699662420	707350453404297	7075872033622690
11108042	-0.12821288200042424	0.36022812290341	4.42_128.0837n	-1.15429e+16	0.2501482260253568	0.9925713787713352	8401562555017630	8339150529067470
11109162	0.11321439391735573	0.41957453570565095	11.51_111.0916m/z	-0.7972678546286499	0.4265072934502657	0.9975377281218302	6874840372885790	6857912646768730
111.09162*	0.08728958790280457	0.5342622960246639	12.45_111.0916m/z	0.05051058887486723	0.9597801273153151	0.998984001183538	5251295107169830	524595979755606
111.09162**	0.14942042160175228	0.2855804125635541	12.14_111.0916m/z	-0.32498025183176504	0.7456314307093768	0.9970940630432498	457255592160338	4559268362363980
111.09162***	0.03556093142275917	0.8004272718883297	12.85_111.0916m/z	-0.5137439252944845	0.6081579382521451	0.999711709237648	4683324752005790	4681974592742690
111.09162****	0.12555185992117016	0.3703660992221552	12.68_111.0916m/z	0.11413866602756467	0.909274637832636	0.9949765996539052	4345037991490270	4323211126140020
111.09162*****	0.09813526880158258	0.4844958563863784	12.27_111.0916m/z	1.72843e+16	0.08588977851462877	1017008384045580	4306992991098570	4380247981972800
111.09162******	-0.03156939830387805	0.8224427689730733	10.60_111.0916m/z	-1.1262e+16	0.2618083717720248	0.9976990398911642	3925048325476770	3.91602e+16
111.09162*******	-0.1538554584005091	0.2713578791607365	10.43_111.0916m/z	0.2222681754637934	0.8243958507063811	0.9986995123071404	3.58372e+16	3.57906e+16
11111675	0.13115613369414467	0.34921393448494603	9.29_111.1167m/z	-1.43334e+16	0.15376110378672844	0.9861258783905564	7272255720901270	7171359560654510
111.11675*	-0.1168833789054182	0.4045652172618893	10.91_111.1168m/z	-1.58886e+16	0.11411636638016685	0.956241332779748	4216599694850100	4.03209e+16
11111676	0.006168733001907204	0.9650330771813858	9.49_111.1168m/z	0.6837831481081638	0.4951265336122526	1.00373e+16	7.16496e+16	7191697286438610
111.11676*	0.04439068650392047	0.7522919742797212	10.58_111.1168m/z	-1.27031e+16	0.2058666844681056	0.9795835028460464	4372236686393010	4282970928528850
11111678	0.14567079958098514	0.2979795536163323	1.06_111.1168m/z	-0.7357519566696009	0.4629864654227063	1000854058253430	5203052567704540	5207496277693060
111.11678*	-0.09265195057766504	0.5093475495274759	0.65_111.1168m/z	-2.79152e+16	0.0059020295391514575	0.9667603554037094	5131270355829470	4.96071e+16
11111679	0.4142727555202387	0.0020431449992493454	4.34_111.1168m/z	-0.2357925125523232	0.8139029541561589	0.9920485060677549	6.28328e+16	6233317550823600
1111168	0.04979336769513331	0.7232811591211346	0.89_111.1168m/z	0.431342188930325	0.6668150654502756	0.9883171715663068	4051587133643240	4.00425e+16
11151375	-0.006331283458567658	0.9641122695301729	9.18_111.5138m/z	1649850879909890	0.10098551827303226	1.13714e+16	0.8483071867579496	0.964642389985414
11151377	-0.19985888555852294	0.15133797617422626	12.40_111.5138m/z	-0.6096602693680826	0.5429738415710614	0.9778448494230058	3.30573e+16	3.23249e+16
111.51377*	-0.10047374275001797	0.4740947801713447	12.76_111.5138m/z	0.29470627670410104	0.7686100827162553	0.9815626826704599	2.5046e+16	2458424238610580
111.51377**	0.0616470115027197	0.6610145655202331	11.99_111.5138m/z	0.07419135805145549	0.9409531706824072	0.9926827674967358	2350329314309640	2333131408257600
111.51377***	-0.20139098917991166	0.14816288249264353	12.18_111.5138m/z	0.16001958086607834	0.8730726598830825	0.9866312764685404	2015563064425690	1.98862e+16
11151901	0.06588045571971482	0.6392911543607919	0.50_111.5190m/z	0.7278631791858124	0.467788405220038	1.7592e+16	4165645441514970	7328197593507230
11152183	-0.07495212189899013	0.5937570238560554	13.00_111.5218m/z	-0.7577695790051262	0.4497320908894044	0.9979101344083064	1.12072e+16	1.11837e+16
11152184	-0.005039814544041834	0.9714293008910064	0.50_111.5218m/z	0.9625595055686934	0.33725828426788074	1.23377e+16	6892374167751550	850362961639211
11154072	-0.09068365558988994	0.5184236050619871	8.75_111.5407m/z	-0.1794092483014416	0.857849184925105	1.02585e+16	3.00423e+16	3.0819e+16
11154073	0.09773208363805924	0.4863011920739357	8.36_111.5407m/z	-1.18705e+16	0.2370128138920147	0.980175976280066	4532684494610800	4442828449674660
11154074	0.07975002534491797	0.5702726198332315	7.95_111.5407m/z	0.6445719759587506	0.5201512952350262	1.0224e+16	3561798967134640	3641574292390250
11154075	0.13107549666144	0.34951289967363464	7.86_111.5407m/z	-0.22640604461445474	0.8211820136098401	0.9960203889980496	4912243001982300	489269418568736
111.54075*	0.06309847809140375	0.6535341294401537	7.65_111.5407m/z	0.0015206118590370525	0.9987886705213946	1.01336e+16	4675078879677080	4737531217370120
111.54075**	-0.16393508748859276	0.2408107421343704	7.24_111.5407m/z	0.1919088613407179	0.8480631706051279	1.003e+16	3.57378e+16	3584497253908330
111.54075***	-0.1055135572940598	0.45208941242028705	7.44_111.5407m/z	-1.51398e+16	0.13205428496589453	0.9966379306707376	3.55642e+16	3.54447e+16
11196829	-0.07507307744804714	0.5931597386193077	8.57_111.9683m/z	0.9894269383393658	0.3239864646130487	0.9988751689816702	1.08732e+16	1.0861e+16
11196831	-0.02588448749819885	0.8540297525100699	0.55_128.9716n	0.4904978925636962	0.6244708246609849	1.0105e+16	8036960216845460	8121367053014320
11197501	-0.0049994960276894965	0.9716577728093344	1.03_111.9750m/z	-1.36804e+16	0.17326717241892614	0.9967525850548116	6068584207896080	6048876996843230
11198435	-0.1187380306576256	0.3970982560848448	9.19_111.9843m/z	0.9839410085209056	0.3266680870773614	1.00366e+16	863038074952875	8661982353321030
111.98435*	-0.06313879660775609	0.6533268166714757	12.76_111.9843m/z	-0.33701833049648394	0.7365560668248222	0.9919963530072278	6880258334957680	6825191176025600
111.98435**	-0.17244229443893536	0.21692799714366584	9.91_111.9844m/z	0.9021399527417552	0.3683733092879933	1.00489e+16	6.63916e+16	6671643110447750
111.98435***	0.027497228152292243	0.8450435565653289	12.23_111.9843m/z	-0.24241366632008685	0.8087780547749741	0.9822819012843758	4136528752332360	4063237327558520
111.98435****	-0.04890636033538194	0.7280189742872587	12.00_111.9843m/z	-0.9339233511633194	0.3517867410332401	0.9825050073044228	4819214475155630	4.7349e+16
11201789	-0.008870073597513626	0.9497374371919924	0.50_112.0179m/z	0.6791753644041116	0.49803319252679795	1.15066e+16	8395579210841600	9660458281404550
11205047	0.027456909635939903	0.8452679781630662	2.26_112.0505m/z	-0.21156207741175634	0.8327248364207652	0.9895121525322836	3.42271e+16	3386811560156400
11205048	0.2302993654045356	0.0971139335309432	3.27_112.0505m/z	-1.67594e+16	0.09575243078098976	0.994306675438804	621924895201683	6183840749206120
112.05048*	0.15409736949862307	0.2705958921476828	3.81_112.0505m/z	-3.24165e+16	0.0014530983977542756	0.9610227810408184	5140827104618060	4.94045e+16
11207563	0.3618990027785559	0.007750270058432414	4.07_112.0756m/z	-2.59869e+16	0.010255044559501256	0.989597924278836	605068287773296	5987743216274030
112.07563*	-0.012216510454757405	0.9308145977388138	0.97_112.0762n	-1.91023e+16	0.05793800777026555	0.9870878371955324	6006919109226730	5929356791735130
11207565	0.06749319637380823	0.6310926408178472	1.28_128.0949n	-0.004322182706045463	0.9965569300820868	1.00438e+16	486492904883241	4886214827280490
11208047	0.1856264492861488	0.1832692842538554	3.74_112.0805m/z	0.18681533250620533	0.8520481576706683	1.00013e+16	8808367104921660	8809525352437090
11208374	-0.1068843868500392	0.44620240574922493	4.06_112.0837m/z	-1.07421e+16	0.2843870293038633	0.9941319461956576	2.72853e+16	2.71252e+16
112.08374*	0.1332930150608184	0.3413488341289416	5.23_112.0837m/z	0.6491559531461016	0.5171921606731399	1.02886e+16	2.19664e+16	2260037833702340
11208375	-0.2736417704832953	0.04740538448988536	4.83_112.0837m/z	-1.92962e+16	0.055468531924640616	0.9663881745421534	2424632576028580	2343136249083700
11208376	-0.20768067773087584	0.13564437676970867	4.17_112.0838m/z	0.3780056841535209	0.7059402215741246	1016860677627870	3183791663249070	3.23747e+16
112.08376*	-0.23582300214480545	0.08914076258188981	4.66_112.0838m/z	-0.38886130105788896	0.6979089929072646	0.9864416269563371	2.12126e+16	2.0925e+16
11208686	-0.14184054052751335	0.3110002185147604	1.32_112.0869m/z	-0.7570903275276208	0.4501377195849964	0.9971842605497244	3.30327e+16	3293972161300520
11211199	-0.05342203416684343	0.7040078301602739	9.74_112.1120m/z	0.4956835446916902	0.6208152709332777	1059200209533710	1.77747e+16	1.8827e+16
112112	-0.03600443510263485	0.7979902412452483	9.92_112.1120m/z	-0.4532427002961861	0.6510037893382479	0.9977470675871898	3789573108379240	3781035456292660
112.112*	-0.0006450962616373546	0.9963422043378314	10.02_112.1120m/z	-0.19641114123304887	0.8445440131568592	1008908725868050	3648594518932170	368109884730504
11211201	0.0732587442121921	0.6021468958148779	4.26_112.1120m/z	-1248080765903140	0.2138715203857485	0.9910206814913678	6976839542404080	691419227796922
11212011	0.1367604074671192	0.3288228148942427	9.32_112.1201m/z	-1.78965e+16	0.07544955555751479	1007211039951400	2.22245e+16	2.23848e+16
112.12011*	0.030279205780603325	0.8295888718279902	9.24_112.1201m/z	0.026701180219901748	0.97873219811719	0.9250346452541076	1355955767715900	125430606256934
11212012	-0.035319020324645164	0.8017573578577215	9.81_112.1201m/z	-2.21265e+16	0.02837439919727325	0.8810178396314643	3356975635858870	2.95756e+16
11212013	0.1782078422773192	0.2017137208128693	1.74_112.1201m/z	0.6180620585835572	0.5374357106227722	1.02859e+16	1.28773e+16	1.32454e+16
112.12013*	-0.20062493736921727	0.1497442009624718	1.97_112.1201m/z	-0.10236137723845	0.9186012979251712	0.9880467524020714	0.8709648603566813	0.8605540017317426
11212015	0.1388569703174406	0.32139108921722137	1.50_112.1201m/z	0.0022878985026841643	0.9981774457923211	1020603734636530	1.83479e+16	1.8726e+16
112.12015*	0.280818466394011	0.04166738691111997	2.24_112.1201m/z	0.491800254680015	0.6235518598489196	1.01639e+16	1.41339e+16	1.43655e+16
11251644	-0.01564358434470585	0.9114751243170228	13.00_112.5164m/z	-0.4392047898303504	0.6611209085216091	0.9984078406396918	74883164641798	7476393871028400
11289562	0.2356617280793961	0.08936606723175652	0.79_112.8956m/z	-0.6840388328083445	0.4949655122543735	0.9777903241845058	5162621522191600	5047961371825630
11296673	0.045277693863671815	0.747504422191018	0.53_111.9595n	0.5881340641468173	0.5572927864355322	1.06273e+16	7.61519e+16	809290759807011
11297118	0.18667473071130952	0.18076415528598885	1.00_129.9745n	-0.8673853848493611	0.3870631530944667	1.00585e+16	8009096341030430	8055962606462050
11297121	-0.03366596115419945	0.8108610164218719	1.25_112.9712m/z	0.3493713483169708	0.7272816997710296	1.03908e+16	2.34201e+16	2433535302699730
1129716	0.025965124530903518	0.8535799961862334	9.04_112.9716m/z	-0.7372113997951363	0.4621011459456025	1.02302e+16	4660818151965640	4768129866459920
112.9716*	-0.15772603597033322	0.2593368171266082	8.76_112.9716m/z	0.9173469361439659	0.3603769134108811	1.06473e+16	4.43363e+16	4720630500816370
112.9716**	0.007862269178231622	0.9554420607014515	9.30_112.9716m/z	0.6015053058807645	0.5483765857552554	1.05708e+16	2.59889e+16	2.74724e+16
11297161	-0.06067936711026368	0.6660198929262902	8.48_112.9716m/z	1.10825e+16	0.2694601313541411	1004527724869890	5712957755297950	5738824456207250
112.97161*	-0.15756793819758555	0.25982070416882114	0.55_112.9716m/z	-0.4112499995299647	0.6814536392313633	0.956798579443332	3349843994723790	3.20513e+16
112.97161**	-0.1856264492861488	0.1832692842538554	8.70_112.9716m/z	0.3884507566420365	0.6982121090638367	1001292128601790	4381161035763870	4386822059247260
112.97161***	-0.04418909392215879	0.7533813523340651	8.54_112.9716m/z	0.011975533652021777	0.9904604363524948	1.01519e+16	5.2627e+16	5342615755781120
11297608	0.04495514573285315	0.7492442677537228	1.25_112.9761m/z	-1.13193e+16	0.2594008903391657	0.9969411312271969	3758394701986990	3.7469e+16
11300829	0.08567684724871118	0.5418704354746351	1.24_113.0083m/z	1.79285e+16	0.07493448380707403	1.03964e+16	4797696734842950	4.98789e+16
11301429	0.03327859845348858	0.8129979260425546	1.87_113.0143m/z	5356089412770730	2.9975e+08	inf	0.0	0.1800896127623794
11301964	-0.11289184578653705	0.4209090452256876	11.80_113.0196m/z	0.3310904775925453	0.7410204591052739	1.00134e+16	5.52553e+16	5532961349216920
113.01964*	0.0774518699128349	0.5814678272436882	11.25_113.0196m/z	-0.5311890318703569	0.5960432866507633	1.00758e+16	3.68948e+16	3717457476030420
11301966	-0.15881463591184625	0.25602140283361297	10.41_113.0197m/z	-0.11972389309952032	0.9048559185034692	0.9660511417467392	2321807661485830	2242984942294710
11302085	0.04680979748506054	0.7392573239059659	1.25_90.0316n	1.86547e+16	0.06399415698730755	1.01864e+16	6862508974333790	6990409752213910
11302116	-0.3494073061464371	0.010333777935038108	11.90_113.0212m/z	0.3911286957002805	0.6962357910025901	0.950105953786367	2.43907e+16	2317376259472070
11302118	0.04277794584982708	0.7610202312937404	11.24_113.0212m/z	-0.15605228697780438	0.8761935646577552	1.00176e+16	4309599701596320	4317165614725210
113.02118*	-0.2816506735617282	0.04104060322731445	10.44_113.0212m/z	0.6452899174249562	0.5196872548601263	0.9712727824083554	2088449645242530	2.02845e+16
11302323	-0.06858179631532126	0.6255833602535972	0.83_113.0232m/z	0.67282073499128	0.5020567786789543	1.00499e+16	6.25225e+16	6.28348e+16
11302325	0.3555286771948871	0.00898738491436522	1.59_129.0425n	-3.56878e+16	0.0004768649220264704	0.9760994586259412	747381287909778	7.29518e+16
113.02325*	0.38709807549876507	0.004190211218446588	1.86_113.0233m/z	-0.2820239948892131	0.7782989082315946	0.9934835671176662	6.04088e+16	6.00152e+16
113.02325**	0.17764338304838656	0.20316897614724605	3.45_113.0232m/z	-1843555737194610	0.06714525793459719	0.9782555720981396	6367069236084740	622862095813455
113.02325***	0.3612539065169186	0.00786841666053099	4.25_113.0233m/z	-400068850527084	9.73076e+10	0.932231749618698	4881882770943490	4551046116990030
11302326	0.22171152142148828	0.11059512898930468	0.58_113.0233m/z	0.016722301585100855	0.9866795234263308	0.997076045568991	5781290914558650	5764386683372070
11303447	0.026932768923359555	0.8481865613074621	2.36_112.0272n	0.5781827648991948	0.5639744427633901	1.0005e+16	1.13307e+16	1.13363e+16
113.03447*	0.2460639052982985	0.07572047516349854	2.18_112.0272n	-0.24472470836740776	0.8069912000047752	1.00451e+16	9685702200450620	9729428419693600
11303448	0.0850317509870738	0.5449283065081398	0.61_113.0345m/z	-1.169e+16	0.24418541149308146	0.9969571065148536	6100064868659070	6.0815e+16
11303449	0.02939219842085197	0.8345098012568911	1.01_113.0345m/z	-0.4027936922491615	0.6876514495155452	0.9974295297658696	6233274745642540	6217252298447710
11303451	0.1028122166984534	0.4638139675549418	4.30_113.0345m/z	-1433309840909430	0.153770440475681	0.9927933019112988	5405421577832490	5.36647e+16
11304258	0.1670016323823348	0.23200310912622665	1.74_113.0426m/z	-1.68693e+16	0.09361477717431624	0.2681614396472364	0.9460927517415838	0.2537055943468385
11305727	0.11938312691926295	0.3945200833048044	1.50_113.0573m/z	-2.08424e+16	0.038767798134214715	0.9561068001426398	4636605023833310	4.43309e+16
11305963	0.411047274212052	0.0022319458497424595	1.28_113.0596m/z	-2498757017218770	0.01349872720589895	0.9919076292405103	6409664162406650	6357794783560640
11305964	0.28485031802924443	0.03870251801982842	8.37_113.0596m/z	-2293940896908690	0.023128271566242174	0.9730741390195228	6710523446132810	652983682471601
11305965	0.13881665180108824	0.3215329953953884	4.12_113.0596m/z	-1.76296e+16	0.0798653913984577	0.9931480979152112	9063790464640550	9001686259859790
11307084	0.007902429205057595	0.9552146927379532	0.85_130.0741n	-0.3532643748917351	0.7243671677077663	0.9994647265160312	6943779913953410	694006309268696
11307336	-0.21707489204096986	0.11844641383275442	2.34_113.0734m/z	1405279041034510	0.16192663257093498	1.0011e+16	1.82414e+16	1.82615e+16
11309601	0.21872795121141556	0.11560003804502217	8.81_113.0960m/z	-1.55911e+16	0.1209960071021461	0.9858617966451328	5.42777e+16	5351031822431620
113.09601*	-0.2945267619538047	0.03229062384497255	8.92_113.0960m/z	-2.06191e+16	0.0408754605443164	0.9810233216343924	2539040056990890	2490857510471980
11309602	0.13123677072684933	0.34891512689801085	8.51_113.0960m/z	0.04206770784589555	0.9664985171196052	0.9989163379234438	5.49601e+16	5490050611128290
113.09602*	0.29178510284184594	0.03401055223742891	5.62_113.0960m/z	-1.63556e+16	0.1039474779808466	0.9863020232967192	5121591157668990	5051435721307510
11309603	0.06205019666624305	0.6589333297109172	5.21_113.0960m/z	0.03521005975425038	0.9719572538840804	0.9897535314847802	6502696823404330	6436067145139300
11309604	-0.040560427450448674	0.7730697229505872	4.32_113.0960m/z	-0.3576952968468562	0.7210548411806084	0.9994719573602536	6759373935477630	6755804697821710
11309606	0.0071363773943632376	0.9595523215591508	4.61_113.0961m/z	0.6143678136732946	0.5398672793600829	1.0023e+16	6287384487706610	630183606568961
11310721	-0.04181030145737105	0.7662714635821577	9.39_113.1072m/z	-0.10535881919947622	0.9162264411722656	0.9992836254858982	4654214291256230	4650880130754800
11310722	-0.12361657113625807	0.3778460206090161	10.72_113.1072m/z	-0.2159973885401065	0.8292719550063679	0.9908452877016346	3783977062552260	3.74934e+16
11310723	-0.26928737071724324	0.05119042407278308	10.95_113.1072m/z	0.8298764540964005	0.40787677761804375	1.00193e+16	3.66874e+16	3.67581e+16
11310724	-0.1841346641811124	0.18687716139665725	3.61_113.1072m/z	-0.34004872140891873	0.7342772673572084	0.9971362468023106	5999791899039480	5982609975803130
113.10724*	-0.007217014427067904	0.9590956721650232	8.73_113.1072m/z	-0.3305695218031776	0.7414132257025281	1016452927544910	4655249503797100	4731841986586570
113.10724**	0.017538554613265582	0.9008026189650014	8.75_113.1072m/z	-0.3205246203741	0.7489996129126631	1.01793e+16	4843375473969460	4930194007973320
113.10724***	0.15510533240743146	0.26743627438685297	3.71_113.1072m/z	-0.7281091733708532	0.4676382476194809	1005643637857210	4996659294922700	5024858630479150
113.10724****	-0.021731680313908385	0.8772512604462083	0.57_113.1072m/z	0.12227221753835915	0.902840805968214	1.00753e+16	3979706316788050	4.00968e+16
11310726	-0.029271242871794962	0.8351813289524881	6.63_113.1073m/z	-0.5106543187747705	0.6103149969863839	1.00267e+16	9104463626415320	9128757227659010
113.10726*	-0.061606692986367374	0.6612228293548661	7.84_113.1073m/z	0.6857713698378615	0.4938751652039611	100671374945992	7461558248172950	7511653280831780
113.10726**	0.001935288784912064	0.9890269113547384	4.98_113.1073m/z	-0.8543701892507723	0.3942100217947409	1.00031e+16	7065827443336740	7068012082081290
11313239	0.10736820904626722	0.4441347965712799	10.16_113.1324m/z	-0.3641045083367356	0.7162729966140746	0.9936959761688694	3.43866e+16	3.41698e+16
1131324	-0.24787823853415356	0.07351913692057911	7.96_113.1324m/z	0.3776723391530061	0.7061873673138295	0.9991593218106156	1.97229e+16	1970636692568680
11313241	0.05672815250773487	0.6866064856046048	7.52_113.1324m/z	-1.1532e+16	0.25059140707364297	1.00927e+16	3150760148959210	3179957732910580
113.13241*	-0.14881564385646728	0.2875570373107126	3.64_113.1324m/z	0.519455401300033	0.6041794403024883	0.9988507081326732	2.73924e+16	2.73609e+16
113.13241**	-0.14244531827279838	0.30892047751006546	3.82_113.1324m/z	-0.1601328223728168	0.8729836065361553	0.9992105568200468	2.64581e+16	2643717002345990
113.13241***	0.09781272067076388	0.4859398428589122	4.07_113.1324m/z	-1.31173e+16	0.1915376754441675	0.9839180301072276	3944451702048040	3.88102e+16
113.13241****	-0.1924805970660457	0.16733527757016098	5.18_113.1324m/z	-0.11903115235280096	0.9054038175539586	0.9991319540322502	2.27168e+16	2.26971e+16
11313242	0.13413970390421742	0.33826315307136745	4.71_113.1324m/z	0.7007249372741375	0.4845185266543316	1.00031e+16	2983141293736600	2.98408e+16
11350967	0.033343413023380765	0.812640278003856	12.49_113.5097m/z	0.9598792879860312	0.33860133373890805	0.9653841372938012	2.19198e+16	2.1161e+16
113.50967*	-0.0015724221377410518	0.9910842728008136	12.81_113.5097m/z	0.3626068271465117	0.717389403414868	0.9655050427374589	2410249604519940	2.32711e+16
11352296	-0.028343009330048193	0.8403385941075492	4.15_113.5230m/z	1.94291e+16	0.05382801451812893	2.20559e+16	0.4137244862918649	0.9125078099041768
11352452	-0.05866344129264694	0.6764939263526718	1.89_113.5245m/z	0.07381303390753356	0.9412537169688564	0.8441720150242291	1.67156e+16	1.41109e+16
11354985	-0.07809696617447225	0.5783152623412744	4.43_113.5499m/z	-0.7518707475889651	0.4532616718705472	0.9974321000997282	2.04855e+16	2043284916073670
11395118	-0.09930450577580027	0.4792803770445844	9.42_113.9512m/z	-0.14353517717243658	0.8860527740472348	0.9398576491131	1.97861e+16	1.85961e+16
1139512	-0.04064106448315335	0.7726306093354576	9.16_113.9512m/z	0.5853498488222315	0.5591582812967455	0.9961780335104417	2509446473302060	2.49986e+16
11395121	-0.1803886784790168	0.19616052899238925	8.75_113.9512m/z	1.00685e+16	0.31556811999633433	1.03664e+16	3.12447e+16	3238947121204610
11395125	-0.0008466888433990279	0.99519915498418	8.72_113.9512m/z	1053794098956890	0.29360662268197424	1015118573976980	3.22101e+16	3.26971e+16
11396201	-0.2379195649951269	0.08625202490247222	0.55_113.9620m/z	1.26912e+16	0.2062900759741301	1.20808e+16	2538958157319400	3.06728e+16
11396364	-0.09531297265691917	0.4972069030679826	8.57_130.9669n	0.6101370846558344	0.5426587769874875	0.9979398044786734	1.4025e+16	1.39961e+16
11396365	-0.09168430618520904	0.5137993667390728	0.55_112.9564n	0.4980296619572323	0.6191645017305616	1.00598e+16	1.06666e+16	1.07304e+16
11397623	0.1990121967151239	0.1531140651756539	1.89_113.9762m/z	265424535905498	0.008772310280635708	1.22498e+16	3179011009960330	3.89423e+16
11401648	-0.008104021786819267	0.9540734202253728	0.50_114.0165m/z	0.8793751175764395	0.3805504836872502	1326466467190360	4703137780014910	6238554555765900
11402392	0.14796895501306825	0.2903393224004653	8.32_114.0239m/z	0.05652443758534682	0.9549963604592888	1006522860287000	6575520187449770	6618411386946900
11402394	0.0013305110396270444	0.9924558798738672	8.13_114.0239m/z	0.4664069265231942	0.6415748997557191	1006002801128470	6.68715e+16	6727292942959600
114.02394*	0.16659610956784685	0.23315493030579054	6.36_114.0239m/z	-0.9749794916300916	0.33107986515137755	0.9997293132114784	5067686925522920	5066315169623820
114.02394**	-0.06692873714487554	0.6339571793173704	7.39_114.0239m/z	1.19437e+16	0.23414588016998755	1.02155e+16	4059790710210440	4147271909142900
114.02394***	0.3300473748602116	0.015798243158866302	5.77_114.0239m/z	0.6207813335620644	0.5356494277250724	1.01298e+16	3.58103e+16	3627509126182140
11402978	0.2267513359655301	0.10252015700857646	1.80_114.0298m/z	-1.81915e+16	0.07080674229420061	0.9821641088812092	5.84308e+16	5738867757221530
11402985	-0.16953177583173218	0.2249051609789841	1.43_114.0298m/z	-0.9994632194310542	0.3191181233569101	0.3618105212853131	0.5215487132641559	0.18870181182178847
11403788	0.25126499390774965	0.06954604942953771	3.37_114.0379m/z	-0.011411547917217942	0.9909096803801246	1.04114e+16	2.61498e+16	2.72258e+16
11403793	-0.06684810011217088	0.6343668351542908	1.43_114.0379m/z	1.2652e+16	0.20768726279490904	1.0283e+16	3.50298e+16	3602133181262680
11404066	0.16683802066596085	0.23246734888394854	2.16_114.0407m/z	-0.483941483600633	0.6291060564456008	1.00138e+16	2.43649e+16	2439847496788320
11404067	-0.0412861607447907	0.7691202537423503	2.38_114.0407m/z	-0.4066753134804243	0.6848038633243825	0.8988939084392212	2440918877927820	2.19413e+16
1140518	0.07133348268693451	0.6117480684719447	4.15_114.0518m/z	-1.35772e+16	0.17651363524777838	0.8032701503888137	2.07555e+16	1.66723e+16
11405493	0.2142525958963064	0.12342888222321455	1.87_114.0549m/z	-4.26253e+16	3.48671e+09	0.9849624973439474	7305585810088190	7.19573e+16
11406081	0.18058663474210696	0.1956618960983373	4.07_114.0608m/z	0.3178538965959609	0.7510208396811877	0.9424692157253232	1.4757e+16	1390805409498950
11406083	-0.10789234975884757	0.441900887544434	4.24_114.0608m/z	0.7050752934287744	0.4818147800356474	0.9906557698627508	1.62027e+16	1605129417594850
11406091	0.3075899612519612	0.025057399395874532	4.58_114.0609m/z	0.22086154913641867	0.8254890420166721	1020539199957670	3846020539639830	3.92501e+16
11406305	0.13006753375263164	0.3532632550224412	3.48_114.0630m/z	-1.66841e+16	0.09723937692522863	0.7616338404689671	2.97991e+16	2.2696e+16
11406307	0.00016127406540933866	0.9990855481708928	4.49_114.0631m/z	0.7257829950560746	0.4690592507212268	1.21499e+16	1.20144e+16	1.45974e+16
1140631	-0.17288579811881105	0.21573000590260494	4.56_114.0631m/z	1.27775e+16	0.20323700163448705	1.01539e+16	34112940487574	3.4638e+16
11406449	-0.022596504450595314	0.8724062436450994	0.91_114.0645m/z	0.16274517930113902	0.8709296972350894	0.949487376317762	4.2959e+16	4.07891e+16
11406451	0.07938715869774696	0.5720336398656496	0.95_114.0645m/z	1.29112e+16	0.19857174812725795	1002524441032600	0.8514347720049539	0.8535841688799899
11406614	0.07458925525181914	0.5955504796355442	0.90_113.0589n	-1.10257e+16	0.27191262411407635	0.9980680822568908	1.23069e+16	1.22832e+16
11407335	0.08168531412983003	0.5609231196259046	4.55_72.0395n	-0.5116685581432111	0.6096065113360118	1.00315e+16	1.30166e+16	1.30576e+16
11407537	0.07952043621992072	0.5713865424022302	4.65_114.0754m/z	0.4597596382713328	0.6463288568745844	inf	0.0	0.031065644212428994
11407736	0.30202600599533896	0.027951770797908605	0.85_114.0774m/z	1.69815e+16	0.0914723724049154	1123449413377230	0.1682909899602885	0.18906641394756055
11407851	-0.04910795291714362	0.7269413048886522	0.91_114.0785m/z	-0.07633613086586218	0.9392494932411376	0.9976864826138472	4924844629868570	491345091619327
11409128	0.005483318223917514	0.9689162639295914	4.15_114.0913m/z	0.8653610869146602	0.3881694603809501	1.00263e+16	1.14435e+16	1.14735e+16
1140994	-0.09495010600974813	0.4988535896629944	4.46_114.0994m/z	0.035753900857907965	0.9715243006667296	1.02721e+16	1.2762e+16	1.31093e+16
11410251	0.10422336477078513	0.4576688108949341	0.80_114.1025m/z	-0.2483383771956944	0.8041992189825817	1.12453e+16	1.63568e+16	1.83936e+16
11410914	0.15908037639588785	0.25521642782387155	4.15_114.1091m/z	-0.9012459573159254	0.3688468501473676	0.9518882401226476	2311030646050380	2.19984e+16
11411063	-0.09599838743490884	0.4941041772083165	4.37_114.1106m/z	-0.6395316960427604	0.5234151343938362	0.8802272220585191	1804907016595650	158872828929192
11411064	0.19518193766165207	0.1613412411364229	4.44_114.1106m/z	-1.08781e+16	0.2783579074385079	0.8080856843531554	1.94678e+16	1.57316e+16
114.11064*	-0.013990525174260127	0.92079791918633	4.62_114.1106m/z	-0.18045096304703687	0.8570327559009575	0.9006433100201574	1.82783e+16	1.64622e+16
11411065	-0.040762020032210335	0.7719720713741358	8.00_114.1107m/z	0.3908684618811776	0.6964277524102479	1.02127e+16	1.67307e+16	1.70865e+16
114.11065*	0.008224977335876273	0.9533887004271968	8.13_114.1107m/z	-0.06466039198165434	0.9485271833397748	0.8355827439466498	1.20164e+16	1.00407e+16
114.11065**	-0.13412509612230036	0.3383162420304205	7.35_114.1107m/z	2940774522421820	0.003772628409047225	1.22798e+16	0.5402124031539085	0.663371766013651
1141277	0.05890535239076095	0.6752337826234783	6.53_114.1277m/z	-1.67919e+16	0.09511594259135472	0.9886564792852924	4396870701096340	4346994707218560
11412771	0.14067130355329566	0.315046400943693	4.59_114.1277m/z	-0.8530654474351747	0.3949308980898292	0.9993789185017244	6863752733185560	6859489783354240
11447822	0.04241507920265608	0.7629882060578569	0.71_114.4782m/z	0.8965702812398998	0.3713297355913852	0.9815139672122668	6646143376191930	6.52328e+16
11453075	-0.06620300385053353	0.6376479864509653	4.00_114.5308m/z	-1.80502e+16	0.07300070118835783	0.9541341352924884	4.31039e+16	4112688489723100
1149562	-0.13288982989729506	0.34282433029454074	9.19_114.9562m/z	1.18213e+16	0.2389511109403951	1.02492e+16	3921106336573980	4018811070943660
11495622	0.2208648325780893	0.11199825524362904	0.55_114.9562m/z	-0.4699729826816976	0.639030639645637	0.9932883021556748	5.98866e+16	5948465307248960
114.95622*	-0.1934079229421494	0.16525960120989153	1.96_114.9562m/z	-1.34073e+16	0.1819556436304864	0.994608154514473	5260535586282300	5232171591229950
114.95622**	0.12442294146330478	0.3747184793379907	1.30_114.9562m/z	0.1461548799413618	0.883987815604055	0.9999151459673292	4847836239979900	4847424881525210
11495623	-0.07329906272854443	0.6019465357440179	0.71_114.9562m/z	-1.82885e+16	0.06933214340553133	0.9847378685822148	6041534625664630	5949327930242640
11496069	-0.09188589876697073	0.5128702877069171	8.56_114.9607m/z	0.6130628392726011	0.5407275462995526	0.9987109701379489	8124502452843430	8114029726567410
11496072	-0.08942646926947828	0.5242627886189222	0.55_114.9607m/z	0.6382161386772897	0.5242687678000196	1.06393e+16	443323075705765	4716638820119470
11496699	-0.0881765952625559	0.5301002430660661	8.57_131.9703n	0.62177495479822	0.5349974752656003	0.9823947883228364	9325500718183860	91613233040447
114967	-0.07753250694553956	0.5810733305202791	0.55_131.9703n	0.4854155495851303	0.628062630019762	1008657572034650	6803839085580040	6862743812575640
11500253	-0.14929818430137606	0.28597920641986585	1.86_115.0025m/z	0.4826619384162992	0.6300123968809463	1.02604e+16	0.7394572268436941	0.7587159704176587
11502688	-0.03386755373596111	0.8097494585610143	1.43_115.0274n	-0.22046301940252766	0.8257988305875916	1.01211e+16	5222966856296950	5286214346693230
11503652	0.18594899741696747	0.1824958318569556	0.87_92.0473n	2.60225e+16	0.010153781099997105	1011058161404430	7.464e+16	7546538571194280
11503892	0.07019453696941466	0.6174586893394542	2.92_115.0389m/z	-0.02169282839478101	0.9827207064254398	1.00068e+16	5361769404201980	53653976372558
115.03892*	-0.010160266120788335	0.9424380559005742	2.82_115.0389m/z	-0.3599800507842273	0.7193489357424436	1.00345e+16	4.19581e+16	42103092510305
11503893	-0.038544501632831935	0.7840701371062049	3.50_132.0422n	-1.23272e+16	0.21953344280112136	0.9804854346460162	6846579108634520	6712971093167850
115.03893*	0.24622517936370775	0.07552271204537682	1.72_115.0389m/z	2.97839e+16	0.0033611513085659637	1021523557956090	6039947923708790	6169949092896520
115.03893**	0.06753351489016056	0.6308882358715259	0.62_115.0389m/z	0.13094826157880354	0.8959849538044252	1.0034e+16	5.84736e+16	5.86721e+16
115.03893***	0.2388872093875829	0.08494375124371571	3.89_132.0422n	-2.85834e+16	0.0048408091670085	0.990172458624794	6426813454841070	6363653679702880
115.03893****	0.19933474484594255	0.1524356549673346	1.98_114.0317n	-1.49238e+16	0.13761987021593994	0.9865826966844136	5.16855e+16	5099201426578770
11504121	-0.2781574443147569	0.04372452116843775	2.36_115.0412m/z	0.7769479598336114	0.4383660011969001	0.9751660700321898	2419564070997290	2.35948e+16
11504576	0.017538554613265582	0.9008026189650014	1.42_115.0458m/z	0.27457715644407044	0.7840044009822477	1013151331406990	3.45766e+16	3.50314e+16
11505017	-0.1647817763319918	0.23835639910536785	1.05_132.0535n	-1.88369e+16	0.06146770391256608	0.9970759033729818	6676179359764600	6656657566217340
11505398	-0.11337566798276508	0.41890818704071575	1.43_115.0540m/z	0.4643545736922631	0.6430411152850823	1015829007713400	3.56252e+16	3.61891e+16
1150541	0.16776534654206454	0.2298445583357269	5.16_131.0734n	0.4592360562892237	0.6467039317525042	1000011992604490	4.55533e+16	4555385385722010
11505417	0.2639250080423827	0.0561850798746568	7.84_115.0542m/z	-0.9868865610710847	0.32522644249619304	0.9301408830377168	2.35409e+16	2189634302151980
11505419	-0.19485938953083345	0.16204855897266832	7.47_115.0542m/z	-2.16945e+16	0.031562198434674935	0.8630219189201046	3106259539304640	2680770068274570
115.05419*	-0.1730470721842204	0.2152955211048136	10.93_115.0542m/z	-4462662051636310	1.54308e+11	0.8835382309527207	4034257421169350	3.56442e+16
11505732	0.2169136179755605	0.11872693855068225	3.66_115.0573m/z	-0.638740821377695	0.5239282275334518	0.9923566030840496	246814438019768	2449279373053950
11505734	0.20320532241576672	0.14446707326689992	3.60_115.0573m/z	0.6725268703212051	0.5022432653417788	1.02929e+16	2732872824414460	2812922316279690
11505735	-0.04926922698255296	0.72607954648852	4.44_115.0574m/z	-190122062978188	0.059116976523212114	0.962353903514609	3985060562431780	3835038587998350
1150695	0.08583812131412051	0.5411072678758941	0.91_115.0695m/z	-1113601886151730	0.2671629074697969	0.9963682066072844	9156418452099680	9123164232064400
11507029	0.16949904274521493	0.22499601680127126	3.68_115.0703m/z	-0.19966445196051508	0.8420030425784641	0.9902411752532668	2591760866033040	2.56647e+16
11507031	0.052655982356149066	0.7080617907796042	3.90_115.0703m/z	-0.7879144749919971	0.4319423147847525	0.9930628622337864	3330052767733400	3306951732914870
11507034	0.15760508042127622	0.2597069691621963	4.40_115.0703m/z	-0.2942160226237416	0.7689839535605372	1.00436e+16	6069601670022360	6096059900427760
1150754	-0.06027618194674032	0.6681097290509922	4.55_114.0681n	1.88462e+16	0.061340731260232075	1.00076e+16	1.0871e+16	1.08792e+16
11507661	0.07519403299710416	0.5925627205879923	4.65_115.0766m/z	-0.31040021329907264	0.7566709430365011	1.00455e+16	8866919079338460	8907268610248210
11507946	0.023707287615172785	0.8661901174946818	4.65_115.0795m/z	0.008200893005797205	0.9934671854761168	1.01406e+16	454575370645178	4609680386676400
11507955	-0.17465981283831378	0.2109842937208728	4.46_115.0796m/z	0.9251390867764576	0.35632246105195203	1.02678e+16	2.38639e+16	2450288978239960
11508652	0.008184658819523937	0.9536169366751814	0.86_115.0865m/z	0.2774092867231418	0.7818331270836627	1.00679e+16	5847439610145570	5887142455362470
11509466	0.0039512146025287975	0.977598781606078	4.15_114.0874n	0.7455891138904409	0.4570375995233086	1002967609640820	9121968800878380	9149039243435140
11509742	-0.051285152800169695	0.7153362536501973	4.15_114.0901n	0.2681796374551403	0.7889153359598204	1.01275e+16	4391054494562480	4447040400451970
11512293	0.06765447043921757	0.6302751854524447	6.47_115.1229m/z	-0.4196170735873877	0.6753425180205799	1.0351e+16	3934650980029310	4.07275e+16
115.12293*	0.06459026319644014	0.6458809515762222	6.60_115.1229m/z	-1.18869e+16	0.2363691609926982	0.9885625911987449	3686103529136830	3643944056190340
11549472	0.08712831383739521	0.5350207487448415	0.71_115.4947m/z	-0.6936460677859763	0.4889357345231832	0.9952646641805276	6860952975741310	6.82846e+16
11551515	-0.05358330823225277	0.7031553991660772	1.42_115.5151m/z	0.7805097304128992	0.4362736209610697	1.00166e+16	6516369336820840	6527185229960040
11552193	0.05737324876937223	0.6832294741241836	8.40_115.5219m/z	-0.3324186364549905	0.7400194226458121	0.9965971478397884	3.94929e+16	3935851290687210
11552194	-0.22130833625796495	0.11126159513649214	8.09_115.5219m/z	0.4337966932820359	0.6650353931092088	1.01136e+16	3.58022e+16	3620888153122830
11553003	0.005644592289326854	0.9680025052788048	1.27_115.5300m/z	0.5420276259923236	0.5885728585009167	0.9598309414752998	1628571889541210	1.56315e+16
11596403	-0.10890031266765593	0.4376224988449584	13.00_115.9640m/z	-0.10942597556522912	0.9130052662739392	0.998021207012437	9765057264015720	9745734237178540
11596404	-0.04979336769513331	0.7232811591211346	0.53_115.9640m/z	0.7730792216660483	0.4406452968058574	1.05224e+16	8710933261403580	916599699902665
11596782	-0.0061284144855548684	0.9652614785342176	8.64_115.9678m/z	0.7481636795368425	0.4554878591611941	1018302582418000	483337122159232	4921834396732340
11596783	0.05793770799830492	0.6802796230003028	8.75_115.9678m/z	1.69839e+16	0.09142768443247447	1.03429e+16	5284073263283990	5.46527e+16
11596784	-0.15353291026969046	0.27237607809098746	8.91_115.9678m/z	0.7979694206655653	0.42610126009869703	1.0235e+16	4.04028e+16	4135205466872580
11596993	0.11369821611358374	0.41757730357370937	0.65_114.9627n	-0.6568665345150947	0.5122346068892822	0.999227392261552	5877864264266170	5.87332e+16
11597478	-0.11591573451296215	0.4084931459837515	0.56_115.9748m/z	-0.6273387946646929	0.5313543098379327	1.00975e+16	3.99866e+16	4037663015400100
11597927	-0.03019856874789866	0.830035964100718	8.56_115.9793m/z	1.11893e+16	0.2648896531963138	0.9951381207901244	6357010307296230	6326103291046230
115.97927*	-0.21324463298749805	0.12524628551531514	8.78_115.9793m/z	1.41032e+16	0.16043465228809234	1006954867716450	5742378241300980	5782315722347090
115.97927**	-0.28581796242170043	0.03801745192354865	8.99_115.9793m/z	0.8893310073606208	0.3751945453120551	1.02091e+16	4763044610201470	4862654306879200
115.97927***	-0.03789940537119458	0.7875992433114913	9.18_115.9793m/z	0.9724071645540796	0.3323533827620477	1.01456e+16	3.88995e+16	3946601623030430
11597928	-0.25606289735367743	0.06421235949346653	0.65_115.9793m/z	0.04069295668490378	0.9675927101210368	0.9879239784394565	3681515187020060	3637057130246140
11601066	0.005566199782614739	0.9684466623820676	1.25_116.0107m/z	-0.7518286937958423	0.4532868914086322	0.7308656852255468	1194034255951200	0.8726786646585556
11601641	-0.04491482721650082	0.7494618357397456	3.40_116.0164m/z	-0.8538519117200625	0.3944962763910936	0.9867577002882506	5625604308773030	5551108370456550
11603003	0.0574538858020769	0.6828077781430986	0.93_116.0300m/z	-0.5220902256642184	0.6023480608316344	0.9204708346512414	2.88509e+16	2.65564e+16
11603414	-0.07507307744804714	0.5931597386193077	1.59_116.0341m/z	-0.7463137114994549	0.4566011313178358	0.9948184764800851	4301647340764780	4279358253894230
11603415	0.038209497305686985	0.7859023009926418	2.51_116.0342m/z	-1.74995e+16	0.08209352173224134	0.9239584577622396	112855351273523	1042736563129000
11604521	0.03523371059828271	0.8022265446431258	2.36_116.0452m/z	-0.6594506978464901	0.5105787228220497	0.8159400640875613	1.78539e+16	1.45677e+16
11604539	-0.06934784812601562	0.62171856066638	0.90_115.0381n	-1.62346e+16	0.10650952196132699	0.9599836112189916	4536051400364350	4354535003996730
11605257	-0.07466989228452381	0.5951517267642357	1.88_74.0187n	2.5133e+16	0.01297602271096338	1.00599e+16	1.02972e+16	1.03589e+16
11605259	0.0391895978944693	0.7805453344611446	8.37_116.0526m/z	-1.02839e+16	0.3053597784564672	0.99759452176897	6773726125867940	6757432075129200
11605267	0.03991533118881132	0.7765851588298665	9.51_116.0527m/z	0.3852935974880409	0.700544746829302	1.00337e+16	6.03031e+16	6050626163514600
11605273	-0.21094647755541496	0.12946555014595582	8.90_116.0527m/z	-1.37804e+16	0.17016451179482228	0.9943474849054442	7102305901706920	7062160010391370
11605761	0.10273157966574872	0.4641664606372201	0.92_116.0576m/z	-2.45134e+16	0.015336517887728966	0.978459610545756	6630193262741180	6487376317704830
11607052	0.1268823709607972	0.3652758026876971	0.92_115.0632n	-2866426709298530	0.004724935699493331	0.9859229854186692	1.31665e+16	1.29812e+16
11607621	0.10704566091544854	0.4455126125336575	3.61_116.0762m/z	-0.4236158404709339	0.6724294916177502	0.9933987832032932	3.80205e+16	3.77695e+16
116.07621*	-0.05930853755428429	0.6731355059946472	3.83_116.0762m/z	0.33847841905293474	0.7354578130097337	10198084763872	3130529501665010	3.19254e+16
11607869	-0.05483318223917515	0.6965614017858882	4.27_116.0787m/z	-1.03259e+16	0.3033952982709989	1014057169228670	2.86875e+16	2.90908e+16
11607997	0.18780364916917489	0.17809401692880752	4.66_116.0800m/z	-1.22568e+16	0.22216507204963265	0.8874739718256619	171609580879892	1.52299e+16
11607998	0.012942504647242824	0.9267140186698184	4.28_116.0800m/z	1.77341e+16	0.07811232478615032	1004464284109810	1.11656e+16	112154362345112
11607999	-0.04257978670650235	0.7620947446165041	4.11_116.0800m/z	-0.3148532290805693	0.7532938296128395	0.7463842478988351	1.30014e+16	0.9704051137382927
11608153	-0.06076000414296835	0.6656022268212516	4.54_116.0815m/z	0.10448818826370908	0.9169161604456992	0.9904905584143672	2932341196246620	2904456268931770
11608333	0.13034976336709794	0.35221067557040603	0.93_116.0833m/z	-2.18683e+16	0.030244548734278537	0.9803906467031628	6.39098e+16	6265655150601560
11609795	-0.08487047692166448	0.5456940712115965	4.15_116.0979m/z	0.9911913234311616	0.3231270865316842	1.02026e+16	4529458900762710	4621229888611870
11610692	0.07890333650151894	0.5743855591963822	1.19_116.1069m/z	-2257072296102550	0.02539183420854301	0.9742394507993708	7281876907888880	7094291759530280
11610693	0.3834290905107027	0.004596342473644054	1.83_116.1069m/z	-2.23691e+16	0.02670996010195941	0.989912119166971	7752606727958770	7674399355141780
11610694	0.07241205536879307	0.6063611740301474	4.79_116.1069m/z	-1763938381883400	0.07969979763068911	1010025194775650	7642002775308610	7718615341607160
11610698	0.010603769800664018	0.9399299462784868	4.51_116.1070m/z	-2.51634e+16	0.012869025534375626	0.9885732341949652	7424222377013650	7339387526627020
11614332	-0.09785303918711624	0.4857592211132148	3.35_116.1433m/z	-2612719028911440	0.009860851748687992	1.05559e+16	2600721718677050	2.74531e+16
1165282	0.03277895379444808	0.8157562399157717	3.30_116.5282m/z	0.7126408690739998	0.4771325743222802	0.9313377890414208	0.6655487064172404	0.6198506607340104
11654641	-0.2152605588051148	0.12163152448441952	3.93_116.5464m/z	0.7698232322530183	0.4425688919888685	1042436947673810	3566479385803070	3.71783e+16
11689083	0.10672311278462986	0.44689278858093184	0.79_116.8908m/z	185132857479176	0.06601289680066691	1.21087e+16	1.71523e+16	2.07692e+16
1169633	-0.2420723721794173	0.08074705832949561	1.08_116.9633m/z	0.13399595708244932	0.8935784830315112	0.967322600881126	1.19918e+16	1.16e+16
11696612	0.10474750548336546	0.4553976703160893	2.87_116.9661m/z	-1.04537e+16	0.2974677983482095	1.0022e+16	1165056646958790	1167624035361240
11696613	0.10341699444373842	0.4611748854609389	0.65_116.9661m/z	-0.4278961747788712	0.6693168415928857	1.00359e+16	8246114122827750	827570449668049
11697185	-0.07313778866313507	0.6027481509203607	12.99_116.9724n	-0.059510789703060736	0.9526214385788244	0.9976320605125096	1.05017e+16	1.04768e+16
116.97185*	0.1266404598626832	0.3661981443428195	0.55_116.9718m/z	0.33369556246138976	0.7390574194912742	0.9982804121830238	8778048084536330	8762953459993330
11697617	-0.16683802066596085	0.23246734888394854	0.67_116.9762m/z	-2587650867433160	0.010575372070003376	0.9952882836868936	6760257916918940	6728405499410980
1170353	-0.061888922600833715	0.6597655176445087	1.43_152.0492n	0.0889378457927461	0.9292453818906444	1.00126e+16	5967091759603890	5.97462e+16
11705452	0.11498840863685846	0.4122780027483913	0.83_152.0684n	0.584661874179419	0.5596197129103675	1005504690530730	6851376950565250	6889091660387490
11705457	0.17437758322384744	0.21173435165319812	1.32_117.0546m/z	-1143936319150260	0.2544023226608616	0.9930960602461342	7403537641799310	7.35242e+16
11705458	-0.04797903445927825	0.732982947260794	3.75_116.0473n	-0.5518335045112418	0.5818520786224213	0.9989831564473012	9443576438317530	9433973798501810
117.05458*	0.012055236389348065	0.931725755758778	4.23_117.0546m/z	0.2955818924935477	0.7679424678345415	1.00341e+16	4872461082093320	4.88909e+16
11705577	-0.13942142954637327	0.31940857040049725	1.88_75.0219n	1.02122e+16	0.30873240602885405	1.00434e+16	5981984541379310	6007924204244060
11705717	0.07217014427067905	0.6075675996267722	5.16_116.0499n	-1.15256e+16	0.2508560218794424	0.9962831078459988	5891367959276420	5869470379932250
11706577	-0.2835829923360142	0.039615110126970964	1.01_117.0658m/z	-0.9500578118085556	0.3435524247218336	0.7114546490995587	182649188270823	1.29947e+16
11706578	0.09156335063615202	0.514357221726809	1.68_117.0658m/z	1214730688136110	0.22630428333172456	1072292566775700	2715179410561420	2.91147e+16
11706579	-0.1252696303067038	0.3714513278114848	1.19_117.0658m/z	0.7848950184097708	0.4337054607225128	1.00533e+16	5526599013401020	5.55605e+16
11706982	0.04475355315109148	0.7503323009823909	7.46_117.0698m/z	-0.1136218133420832	0.9096836882124192	0.9916393858865498	5.44257e+16	5397070822472940
11707293	0.10902126821671293	0.4371106510481964	4.30_117.0729m/z	-0.41228974547942987	0.6806930728339502	1.00862e+16	6790627443621430	6849147789909270
11707357	-0.028102005897577262	0.8416787062922464	4.81_117.0736m/z	-0.1259615675692887	0.8999245390729269	0.9633054740597109	2.14797e+16	2.06915e+16
11707386	-0.11381917166264074	0.4170788462168349	1.82_117.0739m/z	-1.85575e+16	0.06537570931309704	0.9484268896516108	4138772382281490	3925323017503220
11707388	0.1258340895356365	0.3692827833921552	0.92_117.0739m/z	-2857523809436660	0.004852627350990864	0.9828853434003596	1.02818e+16	1.01059e+16
11707671	0.14813022907847756	0.2898080129514347	0.92_117.0767m/z	-2.81441e+16	0.005516743855783345	0.9771581624172402	7.25931e+16	7093494811192440
11708202	0.12623727469915985	0.3677385094889506	4.55_117.0820m/z	0.10556188689394427	0.9160655788117612	1.0166e+16	3.01004e+16	3.06001e+16
11709093	-0.09753049105629756	0.4872051814618577	4.30_117.0909m/z	-0.8031976066775709	0.42308261058009455	0.991766483744884	7.16511e+16	7106113278935950
11709094	-0.10196552785505436	0.4675223506951286	7.53_117.0909m/z	0.7549258511807807	0.4514316753995698	1.0063e+16	4710903582947100	4.74059e+16
117.09094*	0.4004031858950356	0.002969759798778854	3.82_117.0909m/z	-0.4616830875675974	0.6449517480638962	0.9902383693221282	4.43463e+16	4391338316391570
11709095	0.222275980650421	0.1096672205623076	4.76_117.0909m/z	-1.68285e+16	0.09440461492014617	0.9938059691603256	6511739375168590	6471405460658880
11710217	0.19941538187864727	0.15226639974997674	4.28_117.1022m/z	-1.44406e+16	0.15072661573868748	0.9972534377503316	5.27939e+16	5264894059705650
11711029	0.362866647171012	0.0075759418777800545	4.84_117.1103m/z	0.258256321193884	0.7965494985196034	0.9296469850488844	2.22079e+16	2064549193523930
11713856	0.10756980162802887	0.4432748615085246	3.84_117.1386m/z	-0.11843906403297033	0.9058721451366148	1.05249e+16	3839934764839700	4041505805910220
117.13856*	0.11043241628904464	0.4311638585243296	3.72_117.1386m/z	-0.2142524342615503	0.8306300053319715	1085135106904770	3.39359e+16	3.6825e+16
11751782	0.08487047692166448	0.5456940712115965	1.99_117.5178m/z	0.656467393357005	0.5124906210428675	1016901890049240	5978855273731910	6.07991e+16
11793468	0.06515472242537282	0.6429945580374978	0.56_117.9352n	-1.413e+16	0.15964875425923006	0.9944390195575518	772226625030618	7.67932e+16
117.93468*	0.2375163798316035	0.0868017770877994	1.59_117.9347m/z	2.06358e+16	0.04071422834940574	1001865699540400	7493411820103550	7507392275092400
11793469	-0.04342304211146444	0.7575253182478718	9.01_117.9347m/z	0.6795075382172231	0.4978233461533135	1.00466e+16	5489116071401870	5514670840153430
11794564	0.14242488341904913	0.3089906039882216	0.55_117.9456m/z	-0.14086972226234512	0.8881545982212906	0.7931179086800059	1.66034e+16	1.31684e+16
11795946	-0.03648825729886287	0.7953338398161449	0.53_117.9595m/z	0.7917604302188066	0.4297026352492732	1.05503e+16	7977228943174330	8416206665061760
11795947	-0.06870275186437827	0.6249724610788803	13.00_117.9595m/z	-0.09322383600670904	0.9258453574955712	1.01486e+16	6488867783643900	658527240561096
11797108	-0.094796475896768	0.4995516085229537	1.25_117.9711m/z	1.03282e+16	0.3032873010023178	1.17251e+16	0.9276264898048164	1087648006893380
1179752	0.0897893359166493	0.5225740513096789	0.55_117.9752m/z	0.5138467410466224	0.6080862147839149	1.00967e+16	4.47215e+16	4515409777862200
11797966	0.2164701142956848	0.1195009872118262	0.55_117.9797m/z	-1059846751302750	0.2908525225585992	0.9837005574560652	6134496291019450	6034507421188000
117.97966*	-0.025239391236561496	0.8576294485830561	1.08_117.9797m/z	-1.57161e+16	0.11806741288902413	0.9917274416046252	6087809133548100	6037447376990930
11799741	-0.035319020324645164	0.8017573578577215	0.71_117.9974m/z	-0.6160342110446068	0.5387697610897073	0.8158523476728808	6.25588e+16	5103877209448950
11803484	-0.008426569917637943	0.9522475751833016	0.70_118.0348m/z	-0.19259916992301526	0.8475233981202718	1.00606e+16	6668315429616710	670875464043007
11804822	0.30416288736201275	0.026808723733122996	8.91_118.0482m/z	0.5724849169381704	0.5678176405208246	1.00234e+16	8062763137572510	8081604512954850
118.04822*	0.02467493200762881	0.8607815433575421	8.24_118.0482m/z	-0.5607975818257959	0.5757401167681435	1023545565541610	2509116613729640	2568195183409760
11804825	-0.1647817763319918	0.23835639910536785	9.52_118.0483m/z	-0.8811262047947013	0.3796050353475451	1001496468353120	4844743477788610	4851993483082140
11804972	0.15571011015271646	0.2655523634486758	1.52_118.0497m/z	-0.7718488207612308	0.441371631821488	0.9781521422330098	3.38156e+16	3.30768e+16
1180498	0.1490978734709336	0.28663350072555066	1.29_117.0425n	3.28342e+16	0.0012659917856475715	1038507741380410	6923720854772020	7190337706837760
11804987	0.06132446337190103	0.6626813879205382	4.00_118.0499m/z	0.35309873123142843	0.7244910958162922	1.0325e+16	3643567736947940	3761975718178120
11805781	0.12365688965261043	0.3776892739673156	2.34_118.0578m/z	1.46719e+16	0.14433685575582264	1.02392e+16	1460106609141280	1.49503e+16
1180579	0.1271333732729246	0.3643202879508741	2.00_118.0579m/z	-0.36397620440704415	0.7163686134442601	0.9255937379351312	1.5419e+16	1.42717e+16
11805792	0.10942445338023628	0.4354069091781424	1.66_118.0579m/z	1.15153e+16	0.2512765988876928	1.04594e+16	3.5743e+16	3.73851e+16
11805793	0.07781630519993349	0.5796858852182505	1.05_118.0579m/z	-1594477994311840	0.1128530260051497	0.8496783523269477	1291842663695110	1.09765e+16
11806098	0.0261667171126652	0.8524558076782478	0.84_117.0537n	1.33088e+16	0.18516938079963224	1.00174e+16	7953788636352900	7.96763e+16
11806507	0.010119947604436002	0.942666093694271	4.62_76.0312n	-2578089854339280	0.010859913891448294	0.958278850212034	7.28021e+16	6976469453630270
11807253	0.08045082549702567	0.5668786976958906	4.34_118.0725m/z	-2.09034e+16	0.038209442019361134	0.7360440897898405	1.20759e+16	0.8888398939842879
11807999	0.01161196678631132	0.9342305616241038	4.63_118.0800m/z	2.26805e+16	0.024698622850610943	1046503264691090	1.72494e+16	1.80515e+16
118.08	-0.05235454578140528	0.7096592095626119	4.47_118.0800m/z	-0.3889216977119633	0.6978644045117305	0.9206422264969206	1482176556187750	1.36455e+16
11808615	0.27694788882418675	0.0446867069260368	0.91_117.0789n	-1.29768e+16	0.19631269086649808	0.9996727163863556	1.29989e+16	129946251502109
11808617	0.1389779258664976	0.3209656088170427	1.15_118.0862m/z	-1.24524e+16	0.2149095489150554	0.9967778120818936	1.2759e+16	1.27179e+16
1180993	0.1702650945559093	0.22287638319890613	1.16_118.0993m/z	-0.5296666268952026	0.5970960792299634	1006280533460120	5458663790064910	5492947110646000
11812255	0.24682995710899286	0.07478474046468231	1.23_118.1225m/z	-0.4689496806881127	0.6397602939688125	0.998338626383786	1.07291e+16	1.07113e+16
11812256	0.35887511405213085	0.008317712393510842	3.19_118.1226m/z	0.7662137298843646	0.4447069945493584	1.00159e+16	1.04697e+16	1.04862e+16
11893518	0.2094546924503786	0.13226113160820346	2.67_118.9352m/z	0.2498860150309005	0.8030042566578512	0.9393020639595104	1881926554380280	1.7677e+16
11894254	-0.06067936711026368	0.6660198929262902	1.35_118.9425m/z	-0.08405157711029526	0.933123187799902	1.00039e+16	4949582992996400	4951513459362450
11894255	0.2194536845057576	0.11436701680960845	1.56_118.9425m/z	0.43267121175677703	0.6658512032554192	1.00094e+16	6.18548e+16	6191303165775670
118.94255*	0.006289688550964207	0.9643478898972216	2.55_95.9533n	-0.3608834652492435	0.7186747923772578	0.9996674469502032	6316584392515680	6.31448e+16
118.94255**	-0.09390182458458744	0.5036264341435068	3.15_118.9426m/z	0.4389911456000058	0.6612753718439823	1.0005e+16	5.53859e+16	5541338767510400
118.94255***	0.007297651459772574	0.9586390357931898	2.46_118.9426m/z	-0.7686142575629198	0.4432843708258445	0.9945775797351748	5334898070898640	5305970011488220
118.94255****	-0.10450559438525144	0.4564451233477746	2.97_118.9425m/z	-0.5499147887093545	0.5831642806082058	0.996778915698004	4.46983e+16	4455432306261850
118.94255*****	0.12478580811047578	0.3733161666772389	2.26_95.9533n	-0.7391261634825603	0.4609410705892201	1.00104e+16	4.98248e+16	4.98767e+16
11894257	0.08023384754114599	0.567928500973495	1.88_95.9533n	-0.4600797742936541	0.646099567894886	0.9978779565630662	6546216847844990	6532325491346270
11896293	0.06902529999519695	0.6233446191760359	0.55_118.9629m/z	0.8815046530551783	0.3794008950828259	1.05329e+16	4226097824522690	4451297171839980
11896732	-0.12930148194193727	0.3561299710216571	13.00_117.9600n	-0.10953049240223556	0.9129225080537726	0.996743084492792	1.01698e+16	1.01366e+16
11896733	0.08591875834682518	0.5407258795405616	0.55_135.9706n	0.5079946757670766	0.6121746111518345	1.01213e+16	8033504586322940	8130986590304180
11897036	-0.023707287615172785	0.8661901174946818	2.50_80.0072n	0.0345309702292782	0.9724978903957592	1.00913e+16	4229382886701120	4268008717367970
11897037	-0.05358330823225277	0.7031553991660772	0.65_118.9704m/z	-0.3739227319121776	0.708969518125103	1181924753482020	0.8755616635805552	1034848003385760
11898386	-0.08216913632605805	0.5585970462553292	0.70_118.9839m/z	5078245948136670	1.07395e+10	1085241875105900	4986520208756900	5411580541604830
11901359	0.042697308817122415	0.7614574298818537	13.00_119.0136m/z	-0.061204271548007234	0.9512748701167132	0.9989851125269832	1.07482e+16	1.07372e+16
1190136	-0.05313980455237709	0.7055004524210194	8.57_119.0136m/z	0.9161834762546226	0.3609847899374413	1.00036e+16	1.03359e+16	1.03396e+16
11901361	-0.15768571745398088	0.2594601617267873	0.55_119.0136m/z	0.5782920122470729	0.5639008792028231	1.00443e+16	8045582476403550	8081200602123870
11901606	0.11926217137020595	0.3950027408507013	0.95_135.0353n	-1071077243856570	0.2857889877795522	1.00121e+16	8849203950769360	8859933731867240
11901768	0.014998488083068497	0.9151119512660788	1.24_236.0208n	2.30198e+16	0.022658758324045868	1014388207842350	9188929481166900	9321141708390650
11903384	-0.050680375054884666	0.7185536117874425	0.87_136.0371n	0.42527613982265705	0.6712214487245071	1009671673900370	6118603618043800	6177780756963190
11903385	0.0445519605693298	0.7514208162777759	2.12_119.0339m/z	0.6673464062273009	0.5055368559173405	1.00837e+16	4495357559976260	4533005838756680
11904505	0.0030238887264250995	0.9828553048590202	3.15_119.0450m/z	-0.1702523285658505	0.8650323002200128	0.8979407470394236	1688158852712280	1.51587e+16
119.04505*	0.10797298679155223	0.4415577640053899	2.80_119.0451m/z	0.5490926605256344	0.583726956784843	1.01632e+16	1.52418e+16	1.54906e+16
11904506	0.11785102329787425	0.4006592965764316	3.01_119.0451m/z	-0.09386741201394426	0.925334932911748	0.9690888837081744	1.79356e+16	1.73812e+16
119.04506*	0.1352686223620828	0.3341760391333274	1.29_119.0451m/z	-0.07593159646130758	0.9395708095964254	0.9604333720462408	1.85737e+16	1783882792695470
119.04506**	0.004193125700642805	0.9762276609018814	1.56_119.0451m/z	-1.16681e+16	0.24506864166206516	0.8569643484021823	1.59942e+16	1.37064e+16
119.04506***	0.0414071162938477	0.7684625706309817	2.72_119.0451m/z	-0.16692046411758146	0.8676487993280941	1.04739e+16	1.55835e+16	1632200491903460
119.04506****	0.1055135572940598	0.45208941242028705	2.50_119.0451m/z	0.3440721630492232	0.7312553620120623	0.9960313887799088	1464755491271930	1458942446194580
11904507	0.049188589949848295	0.7265103837153388	2.31_119.0451m/z	-0.2451916127907864	0.8066303213033371	0.9432786258396604	1.8717e+16	1.76554e+16
119.04507*	0.1428485034363217	0.3075389510143825	1.99_119.0451m/z	-1592448705283480	0.11330817868961855	0.8884426892103532	1.88261e+16	1.6726e+16
11904508	-0.1987299671006576	0.15370949958420171	0.85_119.0451m/z	-0.44917360027656655	0.6539298213994404	1.01496e+16	4332090258951080	4396893319748130
11904906	0.20937405541767395	0.13241352632612066	3.82_119.0491m/z	-0.413346969360645	0.6799200574722453	1.00032e+16	4820458308588550	4822014252848190
11904911	-0.05672815250773487	0.6866064856046048	9.14_119.0491m/z	0.38458628956176255	0.7010677268517698	1040788101285540	3031674305459700	3.15533e+16
11904912	0.20385041867740408	0.1431696660007121	3.27_119.0497n	-3.31844e+16	0.001126671436951453	0.981134546102239	9131621440843300	895934925753927
119.04912*	0.10353794999279542	0.4606480478144072	5.46_119.0491m/z	-0.1247222035654203	0.900904050993371	0.9903634488536156	3845769460789870	3.80871e+16
11904913	0.06616268533418118	0.6378532881883037	4.80_119.0491m/z	-0.30243021431401623	0.7627269834673116	0.9849277788793366	3.42702e+16	3.37537e+16
11905408	0.2366696909882045	0.08796518766379037	5.07_119.0541m/z	0.19969116422534836	0.8419821860280221	0.9901351492306448	3.21881e+16	3.18706e+16
119.05408*	-0.01830460642395994	0.8964930283516861	4.90_119.0541m/z	-0.35104256683522683	0.7260300434865614	0.9917545180252301	4297547111867380	4262111764620750
11905784	-0.10450559438525144	0.4564451233477746	4.51_119.0578m/z	-0.5406938228000862	0.5894898140820306	0.9979371195438344	4609124102799380	4599616030767670
1190644	-0.02334442096800177	0.8682199149514549	0.84_119.0644m/z	1.3866e+16	0.167542202574074	1.012e+16	4.19771e+16	4248093525230490
11906844	-0.16627356143702815	0.2340738803144448	8.77_119.0684m/z	-0.44660303377037336	0.6557810547510838	0.9704536623737988	2.41338e+16	2342077059476700
11906845	-0.1080536238242569	0.4412147885459784	10.93_119.0684m/z	-1.80117e+16	0.07360824973759185	0.9928126270713132	2031829786654230	2.01723e+16
119.06845**	-0.0844269732417888	0.5478025904818459	9.04_119.0684m/z	0.13757780135721345	0.8907515120658303	0.9705692850124488	1408275602373350	1.36683e+16
11906846	-0.11510936418591547	0.4117831849648277	3.79_119.0685m/z	-1.39506e+16	0.16498134199535966	0.9051086584549888	0.9602979272020432	0.869173968606948
119.06846*	-0.2922373053761012	0.03372175014245399	8.91_119.0685m/z	0.5726018320449806	0.5677386542830108	0.8278150222780333	0.3692004801898992	0.305629703733462
11908549	0.27166616318203096	0.04909336308542489	8.77_119.0855m/z	-0.8913904078714592	0.3740925535872544	1.00012e+16	7.55135e+16	7552244016757430
1190855	0.013264791879918105	0.924894266440584	9.12_119.0855m/z	-0.4566204494738329	0.648579012262855	0.9936056077530436	6408807545363310	6367827116083000
119.0855*	-0.18191714578173399	0.19233384413272947	5.96_136.0888n	-0.018021018561664288	0.9856451136442794	1.00415e+16	6.99154e+16	7020561360968970
119.0855**	-0.03777844982213758	0.7882614243883528	9.29_119.0855m/z	-0.28684757068071115	0.7746096695887967	0.9876270020850354	6566397009119380	6485150992616720
11909238	0.2877129326902601	0.03670483447414519	0.91_119.0924m/z	-1.38017e+16	0.16950838634462756	1003001283953540	7.01809e+16	7.03915e+16
11909241	0.16578973924080015	0.23545696887896664	1.15_119.0924m/z	-1.46359e+16	0.14531840134964066	0.9956392795456344	6736075352308210	6.7067e+16
11912596	0.06995262587130065	0.618674530186583	11.90_119.1260m/z	0.26349755932628305	0.7925148316980001	1.00051e+16	1.12932e+16	1.12989e+16
11912876	0.04189093849007572	0.7658334591339233	1.23_118.1215n	0.07324095594259279	0.9417082001805812	0.998471216191596	4794193631478030	4786864345879870
1191288	0.06200987814989072	0.6591413383342084	3.19_118.1215n	0.6373435902956771	0.5248353404211944	0.9632766721275366	2.7229e+16	2.62291e+16
11951367	-0.061848604084481375	0.6599736285160043	5.19_119.5137m/z	0.6599871776751054	0.510235310959971	0.976377250640042	1.84845e+16	1.80478e+16
1195152	0.048745086269972614	0.7288814857344538	13.00_119.5152m/z	0.3537322875592725	0.7240171331531795	1.01165e+16	7682345358763010	7.77184e+16
11951521	-0.07725027733107323	0.5824546003057323	0.55_119.5152m/z	0.6032604658838893	0.5472115142408067	0.9708744798524008	5363516070139560	5207300874776740
11951524	0.00475758492957549	0.973028651073628	8.57_119.5152m/z	0.21023201647502066	0.8337609249915291	1.0215e+16	5447165757009100	5564290664245900
119.51524*	0.10681236267568628	0.4465106543606912	8.39_119.5152m/z	0.6933067524938374	0.48914801574894	0.9987948198351502	3.4527e+16	3448540675661840
11951525	-0.20409232977551808	0.14268538103547002	8.76_119.5153m/z	0.5182728005122582	0.6050022470038099	0.9975769348930904	5530951772416800	5517549916169060
11951526	0.14167926646210402	0.31155632611427553	9.18_119.5153m/z	0.4733940402713451	0.6365938548765375	1010499275149730	4797260340258800	4847628096536080
119.51526*	-0.2128989335325117	0.12587423525793115	10.23_119.5153m/z	0.8757840313048079	0.3824939493848155	0.9066509519060668	2.14145e+16	1.94155e+16
119.51526**	-0.12427146036402903	0.3753048175861704	8.17_119.5153m/z	1818201530908000	0.0709516348672043	1.31806e+16	1480741598405260	1.95171e+16
11951527	0.03810099795295626	0.7864959393762151	9.65_119.5153m/z	-0.9815081470479554	0.3278619606623492	0.80760149151447	1.87754e+16	1.5163e+16
11995703	-0.005120451576746503	0.970972363897142	1.24_119.9570m/z	2.36344e+16	0.019338119072127662	1.02986e+16	442967757909989	4561943121161920
11995704	-0.20848704805792254	0.13409858720338125	3.29_119.9570m/z	0.4504751471063321	0.6529933104593589	1.01452e+16	2924835869359710	2.9673e+16
11995705	-0.0878137286153849	0.5318009675925032	5.16_119.9570m/z	-0.6484054964351044	0.5176760063366361	0.9976384213289526	6273253256130540	6.25844e+16
119.97062*	-0.11131942364879599	0.4274492975770682	2.75_119.9706m/z	-0.10938063080690616	0.913041171325892	0.9913899999755538	2.32546e+16	2305442327095820
11997064	0.06987198883859598	0.6190800358347298	11.82_119.9706m/z	-1.116e+16	0.2661389282153475	0.8596901940589898	2.9647e+16	2.54872e+16
12000314	-0.2773510739877102	0.04436407155236129	0.79_97.0139n	0.7678819982376567	0.443718050826183	1.00221e+16	8156248441988500	8174285213145830
12001113	-0.11313375688465108	0.4199079366249117	4.57_120.0111m/z	-364186359314224	0.00036782400978921164	0.9997619002336888	3.38947e+16	3388659792720100
12001131	-0.002056244333969068	0.9883411392825632	0.89_120.0113m/z	2247922255285980	0.02598272994230592	1.15996e+16	3775026312205090	4378871164485420
12001942	0.08603971389588216	0.5401540415917172	0.95_120.0194m/z	-1.15188e+16	0.2511345964371929	1.00329e+16	5274297405315340	5291657310322170
12002354	-0.13341397060987542	0.3409069555405897	0.67_120.0235m/z	-2750019599315730	0.006663609375984503	0.9771609607473576	7250946259011080	7.08534e+16
12002357	0.07015421845306231	0.6176612589811371	4.45_120.0236m/z	-0.0017133740393697524	0.9986351150345094	0.995203726675724	4396665188853520	4375577580892450
12002543	-0.1830863827559517	0.18944269207499775	12.99_120.0254m/z	-0.7111539334766951	0.4780508234455111	0.996088470180245	7312460192164920	72838572860675
120.02543*	-0.10003023907014233	0.4760582011821639	10.84_120.0254m/z	-1.70021e+16	0.09108495887486663	0.9913683392893357	5413932132969730	536720090768738
12002544	-0.1851829456062731	0.1843366250251643	9.12_120.0254m/z	-0.7552025708646902	0.451266129949301	0.9899413962065872	655182284806083	6485920657907550
120.02544*	-0.3674629580351781	0.0067936489255531075	10.94_120.0254m/z	-3438703853172090	0.0007497357926205362	0.9686370002424172	5877777599860060	5693432862420520
120.02544**	0.06616268533418118	0.6378532881883037	10.13_120.0254m/z	-3.91456e+16	0.00013499857261232618	0.9577657258704269	6214301889853310	5951845360313320
12002545	0.08692672125563354	0.5359695548093147	8.95_120.0254m/z	-0.6562950088875031	0.5126012114291568	0.9992130079910692	7531730125981580	7525802714559010
120.02545*	0.07333938124489675	0.6017462048419369	9.25_120.0254m/z	-0.7393320365660022	0.4608164386174447	0.9988920166142886	6092377702269900	6085627448996300
12004434	0.11426497872363288	0.4152446187553025	4.01_120.0443m/z	-2.96161e+16	0.003539335265199328	0.8612783528759013	2944456454557500	2.536e+16
120.04434*	0.047495212263050236	0.7355771687492192	3.71_120.0443m/z	-3.55971e+16	0.0004923476932113045	0.9042713548183188	4208514302448870	3.80564e+16
120.04434**	0.07048244996493003	0.6160129684859094	1.23_120.0443m/z	0.7691376339110495	0.44297455152054777	1.38677e+16	0.07871011192324423	0.10915295087338027
120.04434***	-0.014272754788726472	0.919205439848182	2.93_120.0443m/z	0.2373296532773531	0.8127124520769369	1.03288e+16	1.96379e+16	2028367689183590
12004435	0.06741255934110355	0.6315015328434235	4.88_120.0444m/z	0.05593055015256481	0.9554687032583904	0.9969299991102484	4331284354743240	4.31799e+16
120.04435*	0.23235560973850464	0.09408357961928122	3.80_137.0476n	-6248798503314960	3.77015e+06	0.9539082065116552	5.83566e+16	5566686277827980
120.04435**	0.25634512696814377	0.06390911541276728	7.71_155.0582n	0.6661926308582541	0.5062719535166407	1.00682e+16	531575334683037	5351981149925890
120.04435***	0.02652958375983621	0.8504330024772375	5.57_120.0444m/z	-0.2557094780444455	0.7985120309815736	1.00901e+16	2845851272380450	2.87149e+16
120.04435****	-0.0778147365600059	0.5796935499080108	4.35_120.0443m/z	-3111436917827680	0.00221455501090073	0.778146927215586	2016369489898890	1.56903e+16
12004436	-0.17474044987101844	0.2107703343223845	4.76_120.0444m/z	-2.36334e+16	0.019343200643080368	0.9847003332530436	4627862164145980	4557057415283700
12005547	-0.03144844275482103	0.8231121188611479	3.23_120.0555m/z	1231780692840660	0.2198845419930558	1.02356e+16	2.99019e+16	3.06064e+16
12005558	0.005201088609451171	0.9705154361481768	9.41_120.0556m/z	106558092766752	0.2882595691363221	1.01385e+16	4.54558e+16	4608536686529530
12005559	-0.08623576184949497	0.5392278154472399	0.53_120.0561n	-0.8645980568247742	0.3885869712808483	0.9121911627177698	6145403015640220	5605782322206140
120.05559*	0.12075395647524233	0.38907419531538623	10.20_120.0556m/z	0.7368451364822972	0.4623232369032511	1.00549e+16	3.76409e+16	3.78476e+16
120.05559**	0.033262775990676105	0.8130852404450449	9.03_120.0556m/z	0.22052985107686446	0.8257468785015025	0.9552594723933341	2.19842e+16	2.10006e+16
120.05559***	-0.10273157966574872	0.4641664606372201	1.74_120.0556m/z	-0.479414315979282	0.6323153095557841	1.1222e+16	1.76969e+16	1985940162819100
120.05559****	0.07623038811527913	0.5874584288929937	1.88_120.0556m/z	-0.6433667223602635	0.5209307937593297	1.18665e+16	0.1874839664771049	0.22247812772436396
1200556	0.2595706082763305	0.060524312949238365	4.83_120.0556m/z	-0.5457999249911669	0.5859831068609054	1015089028182970	3.45674e+16	3.5089e+16
12006543	-0.1153915938003818	0.4106299403482574	0.81_120.0654m/z	-0.08214674174573533	0.934635329112395	0.994321743898518	9716128273353930	9660957608702980
120.06543*	-0.03447233148124613	0.8064170267405137	1.41_120.0654m/z	0.01201838954329024	0.9904262995248614	0.9971548603314624	4.85125e+16	4837445745138780
12006545	-0.02987602061707998	0.8318248658203429	4.27_120.0654m/z	1.09927e+16	0.2733425091672455	0.9989277014013124	1.51678e+16	1515154519094680
12006546	0.19743977457738288	0.15645324686192494	1.74_120.0655m/z	-1918114726149760	0.05692321334513064	0.986921522462076	5074003153349830	5.00764e+16
120.06546*	0.03366596115419945	0.8108610164218719	5.59_120.0655m/z	-0.16564327571489162	0.8686521598734641	0.9785127179884671	1.98681e+16	1944116760258990
120.06546**	-0.18792460471823186	0.17780962910452752	5.86_120.0655m/z	-0.6614209281788825	0.5093181364342318	1.00822e+16	2.04144e+16	2058219898346980
120.06546***	-0.10035278720096097	0.4746298300225993	6.18_120.0655m/z	0.5054336875144064	0.6139676336540145	1.00059e+16	2.6364e+16	2637960921936750
12006547	-0.009031347662922969	0.9488247784356854	4.92_120.0655m/z	0.07441299399971557	0.9407771037531102	0.8516978490037167	1.62942e+16	1387771194049360
12006548	0.16591069478985715	0.2351106718471453	1.10_119.0582n	-1.59337e+16	0.1131019488966004	0.965759603472794	7866537092496660	7597183743153600
12007768	-0.06070775645607405	0.6658728365173167	3.73_120.0777m/z	0.8825097355238047	0.3788590706299765	0.6165423134018079	0.2108034373632917	0.12996923894501694
12007896	0.11914121582114895	0.39548574460763053	3.77_120.0790m/z	1.39734e+16	0.1642969556994459	1011824564794820	3.55043e+16	3592409039985340
12008074	0.09611934298396584	0.4935576825881439	3.76_119.0735n	-0.7478037690491172	0.4557043248513035	1.0025e+16	1.2022e+16	1.20521e+16
120.08074*	0.2076000406981712	0.13579968700630668	3.39_120.0807m/z	-0.4554510197694306	0.6494180841284507	0.9888910291781888	4303977670042500	4256164907688270
12008075	0.2796492294197932	0.042561269840098975	7.30_120.0807m/z	-1949361077578120	0.05304583558845171	0.9738725066173732	6228731407425330	6065990268795670
120.08075*	-0.04608731340327095	0.7431427936579016	0.96_120.0807m/z	-0.2382823852510244	0.8119747885998221	0.7786678617352314	0.7255630488741076	0.5649726278208965
12010183	-0.32629775283944445	0.017102007352326056	0.83_120.1018m/z	0.14337446996846614	0.8861794757180137	0.981663410869111	5408577916923480	530940304587846
12011791	-0.00838625140128561	0.9524757927055391	0.86_120.1179m/z	1.35279e+16	0.1780816091074155	1.00362e+16	4.07143e+16	4.08616e+16
12052712	-0.005056661450351403	0.9713338356253258	10.94_120.5271m/z	-0.6726366959651681	0.5021735656054654	0.6694034439772567	1.44093e+16	0.96456383078144
12053073	0.17969962738235562	0.19790322573390806	4.51_120.5307m/z	0.5046273091290936	0.6145326861187863	0.9845929051128042	4306626913195980	4240274303700610
12096486	-0.10083660939718897	0.47249156203814	0.55_120.9654n	-0.03401480917832917	0.9729088248964142	1.00186e+16	5388725566752680	5398721720864740
120.96486*	0.011571414193120048	0.934459746116485	8.53_120.9649m/z	0.974922694527278	0.33110795003106097	1017620394547580	5531163888706890	5.62863e+16
12096605	-0.024494468065502192	0.8617897599343223	1.50_120.9660m/z	-0.3820707607548277	0.7029288541347052	0.6669082066566768	0.8346416396669458	0.5566293591112711
12096863	-0.0331418204416191	0.8137527938447365	8.56_120.9686m/z	0.2802487288444238	0.7796579694597334	0.9663579594650284	6617982929825120	6395340479840190
12096864	-0.22594496563848346	0.10378063684258652	9.23_120.9686m/z	1.26517e+16	0.2076986997954694	1.02977e+16	4938383531197910	5085413369407580
12100752	0.08273359555499074	0.5558890554870464	0.97_121.0075m/z	0.3213620887026862	0.7483661672914574	1.04702e+16	1.73853e+16	1.82027e+16
12101182	0.15200080664830168	0.2772471331247475	0.95_121.0118m/z	-1.03619e+16	0.30171729569078803	1.00131e+16	5304938302427200	5311899238478460
12102833	-0.019110976751006637	0.8919598184105768	4.18_121.0283m/z	-3.40095e+16	0.0008529731733463109	0.960304618637131	6965762320031690	6689253728254930
12102834	-0.026086080079960532	0.8529054483144105	0.67_78.9945n	-0.022656473412831814	0.981953250071224	1.00436e+16	6092575051308060	6119122513181990
12102835	0.0024594294974924144	0.986055295495838	10.16_121.0284m/z	-0.2888737135130797	0.7730615307711729	0.9912232816554868	4749580384433680	4707894655144880
121.02835*	0.05156738241463603	0.7138364932752677	8.63_121.0283m/z	-2340233985010000	0.020537990239699842	0.9703132654562217	6.71891e+16	6519446073831940
121.02835**	-0.10680374981733452	0.4465475234884776	5.31_121.0284m/z	-4664874857777520	6.59702e+09	0.9758354577924396	5086155329704460	4963250714565610
121.02835***	0.02088499147050936	0.8819990052910891	4.31_121.0283m/z	-3870705525432150	0.00015917394305572206	0.9222711839653388	7047456018397620	6499665606031230
121.02835****	0.3073077316374948	0.025197898992536872	4.87_121.0284m/z	-2.41473e+16	0.01690398903016577	0.9020960710776956	5549385846163320	5006079168718110
1210315	0.0032657998245391073	0.9814839593151314	2.92_121.0315m/z	0.1662233570892715	0.8681964207650452	0.9757626900152704	2130336847029450	2.0787e+16
12103152	-0.05922790052157963	0.6735549645050485	2.27_121.0315m/z	-1.56377e+16	0.11989826658565672	0.8915947282606286	1.60463e+16	1430679269266270
12103162	-0.021087554941394745	0.8808627648280232	3.91_121.0316m/z	-3.08519e+16	0.0024070984821394463	0.4868843667573316	1004915464886610	0.4892776297659681
121.03162*	-0.1493790171028386	0.28571545206658355	1.56_121.0316m/z	-3.12075e+16	0.002149761539700739	0.4912388238428573	1.03424e+16	0.5080597004388417
12103165	0.0771293217820162	0.5830470279773987	2.00_121.0316m/z	-1482312437504620	0.14027444503453632	0.9847286611037924	3.70008e+16	3.64358e+16
12105894	-0.1132287631962686	0.419515140510161	0.53_121.0589m/z	-0.5724143122984209	0.5678653426156315	0.7676040558838809	3.43293e+16	2.63513e+16
12106166	0.14429997002500575	0.3025983643310123	3.24_121.0617m/z	0.2899201141209647	0.7722623515684781	1000961294745750	7.54988e+16	755713534155138
12106474	0.20937405541767395	0.13241352632612066	8.51_121.0647m/z	1.96653e+16	0.051011612181178737	1.01546e+16	7376294662847020	7490306690181890
1210686	-0.0747908478335808	0.5945538192782276	0.81_121.0686m/z	-0.2972188904581724	0.7666948021991101	0.9914454354633796	6580722844016340	6524427625749590
12106882	0.17893357557166126	0.1998535342547457	1.10_121.0688m/z	-1.4947e+16	0.1370127996423637	0.9101824883048292	4180296700758510	3.80483e+16
12107191	0.0745489367354668	0.5957499004001005	0.86_121.0719m/z	-3.19378e+16	0.0016991061326641602	0.9818439953080336	938834726108363	9217892384161580
12107597	0.2994993845973104	0.029355601317039407	3.96_121.0760m/z	-0.8728156295216161	0.3841050522080165	0.13281185567820314	0.6301439124829639	0.08369058236118568
12108391	0.14038907393882932	0.3160280710391664	3.22_121.0839m/z	-0.17059947131998165	0.8647597758738832	0.996652529624477	5008349587373040	4991584285499040
12108407	0.05803437619234383	0.6797749114421803	5.08_121.0841m/z	0.2978726250084858	0.7661967177707951	8313782360662850	0.036533204033936686	0.3037291072758398
121.08408*	0.226727727550264	0.10255689186635283	4.23_121.0841m/z	1.18402e+16	0.23820649254382856	1.55802e+16	0.08868558262789808	0.13817413175428533
12108409	0.10990827557646428	0.4333673347395913	3.76_121.0841m/z	-0.7644184317121482	0.4457726578762908	1.00254e+16	9518712163922200	9542937271939590
12108587	0.04894667885173428	0.7278033985868206	3.50_120.0786n	-0.97584716256472	0.3306510149593341	0.9835787885034324	6340612187077540	6236491653335830
12108692	0.18256224204337132	0.1907348589359051	3.76_121.0869m/z	-0.4213409822876199	0.6740860776736948	1.00554e+16	5962340032064730	5.99537e+16
12108852	-0.2772704369550055	0.044428445609234174	4.07_121.0885m/z	-1947050451416670	0.053324728197038235	0.9740384761052624	2.40571e+16	2.34325e+16
12110113	0.2613446229958333	0.058725035685461974	8.51_121.1011m/z	-0.4523169954674309	0.6516689757630105	0.9962639931014552	8471250437783650	8439601787708790
12112417	0.0896683803675923	0.5231366623270094	0.86_120.1169n	2.8209e+16	0.005411755201174105	1.00732e+16	7.44852e+16	7503037559674900
12152033	0.06890434444613994	0.62395485124523	0.68_121.5203m/z	-0.3833860056645614	0.7019555381433058	0.9466325868987754	3.1664e+16	2997414198415170
12153859	0.12772905980419622	0.3620587055291575	4.44_121.5386m/z	-2.41343e+16	0.016961936533828787	0.868210759511458	3937514147278780	3418592148396020
12155676	0.04354399766052144	0.7568705547824294	4.89_121.5568m/z	-0.2651570850440893	0.7912385035746091	0.9717081385290728	4.18816e+16	4069671864232620
12201917	-0.06704969269393256	0.6333428996062984	0.71_122.0192m/z	-0.4395077852272566	0.6609018698973541	1010716532136140	573947577201304	5800983048568440
12202358	-0.2570305417461335	0.06317744102287436	3.60_122.0236m/z	-0.7554830920519355	0.451098345683493	0.7289922318111345	0.25472919891181645	0.18569560722218748
12202694	-0.051688337963693036	0.7131940666943828	0.89_122.0269m/z	-0.987716297819532	0.3248210991886601	0.9926402607562078	3685969418694610	3.65884e+16
122.02694*	-0.02871956036173428	0.8382456622628025	1.77_122.0269m/z	1.61336e+16	0.10868796032053643	inf	0.0	0.06339988300796716
122.02694**	-0.0916938208100483	0.5137554976232299	1.08_122.0269m/z	-1894485942764810	0.06001104003979945	inf	0.0	0.002191609321051364
12203171	-0.05188993054545471	0.7121237943759489	6.56_122.0317m/z	-3.94815e+16	0.00011888859085111836	0.8832744495057818	0.570036833773357	0.5034989705491808
1220324	0.18151396061821065	0.19333805196277584	0.84_122.0324m/z	-1.64281e+16	0.10243598622504103	1.23514e+16	224378613422002	2.77138e+16
12203619	0.07160568504174636	0.610386624506308	2.12_122.0362m/z	1.19166e+16	0.2352060333949968	1.05497e+16	2.11847e+16	2.23494e+16
12205264	0.06704969269393256	0.6333428996062984	2.51_122.0526m/z	1195781615784260	0.23359625021468	1.00258e+16	2.46874e+16	2475098650319710
12205998	0.2953734507972037	0.03177431640546287	4.06_138.0793n	-2.43036e+16	0.016217907120631644	0.9715327903764516	6602069839356010	6414127333289760
1220633	0.07540828541062218	0.591505860370954	0.84_122.0633m/z	-2867362659229690	0.004711691584274242	0.6142252112275173	2.8037e+16	1722103501067350
12206794	0.09349863942106408	0.5054683512820719	3.24_138.0872n	0.11162986862645824	0.9112603891490991	1001768789176360	921344370613449	9229740345638920
12207119	-0.29581695447707945	0.03150662194929766	1.01_122.0712m/z	-0.5038974995297459	0.6150442838513142	0.9976523732166817	5094887746637250	5082926851705240
12207526	0.07716964029836854	0.5828495217938051	0.86_122.0753m/z	-2.68087e+16	0.008132716836234382	0.9675399316786708	5482851471277070	5304877737923720
12208107	0.03229513159822007	0.8184293180596821	0.80_122.0811m/z	0.056136360509715814	0.9553050121249524	0.9628888857446176	6970339975142240	6.71166e+16
12208743	0.12603568211739816	0.3685101580328496	3.76_122.0874m/z	-0.5883438473831758	0.5571523504004381	1.01102e+16	6.08931e+16	6156419128061140
12209637	0.0624533818297664	0.6568546535067965	3.78_122.0964m/z	-2509387008617090	0.013114765889606078	0.9899442394867132	9342910927922470	924896085313431
12210446	-0.07229109981973605	0.6069642569243753	4.15_122.1045m/z	-1.68305e+16	0.0943666130618496	0.9047330857707718	3.43962e+16	3111939693389030
122.51	-0.21675234391015116	0.11900796832486622	1.92_122.5100m/z	-1972079731187020	0.05036863815992256	0.9462668384490468	2568300368187980	2.4303e+16
122.51*	0.1202701342790143	0.3909911839359471	1.74_243.0055n	4118387134869570	6.1698e+10	1.10977e+16	2.44489e+16	271325919865798
12252818	0.0381168270529212	0.7864093252532809	4.15_122.5282m/z	1.39293e+16	0.16562136967405686	inf	0.0	0.277450710071192
12252819	-0.29105936954750394	0.03447833234575444	4.02_122.5282m/z	-0.2952405016533894	0.7682027412706429	0.9880664493254109	2148919983458230	212327573794
12254704	0.06963007774048195	0.6202972274784155	9.09_122.5470m/z	-1.11038e+16	0.2685418144584876	0.9708487399258916	3.16505e+16	3072784738967900
12254705	-0.09067634327640066	0.5184574736012725	8.90_122.5470m/z	-2036200070259980	0.043421777804511084	0.9571722511913856	4756561903313620	4552849064925880
12254706	0.0181433323585506	0.8974000686056356	8.66_122.5471m/z	-0.2338577830144593	0.8154020021371352	1009003605059230	8021252025931260	8093472211253320
122.54706*	-0.1753855461326558	0.2090641399493076	6.77_122.5471m/z	-0.3857487223191545	0.7002083055002439	0.9993764841175355	5316404736217740	5313089873427100
122.54706**	-0.04822094555739225	0.7316869433282405	6.60_122.5471m/z	-0.6003622085807095	0.5491360359321182	0.9911333101273851	4766763873066230	4724498456107770
122.54706***	0.18671504922766186	0.1806682993572103	6.50_122.5471m/z	-0.7179710677185771	0.4738489621462328	0.9775377556313992	4584928856976170	4481941064578120
12254708	0.12720491909161588	0.3640482054496742	7.45_122.5471m/z	0.6363616347293343	0.5254733328468878	1.01181e+16	4345489536631910	4396806719025910
12296182	-0.10148170565882636	0.4696485637206144	0.54_122.9618m/z	0.026742561492161396	0.9786992453514556	1.42174e+16	1544703544625040	2196164409547710
12296395	-0.0536236267486051	0.702942347929862	0.50_122.9640m/z	0.12398225961816126	0.901488926837512	1.08634e+16	6309969613736600	6854767338522150
123011	-0.06047777452850199	0.6670644977250207	1.11_100.0218n	-1.54079e+16	0.1253949959665803	0.9200893754887608	415282706756446	3.82097e+16
12304399	0.21711521055732216	0.11837636151018115	3.27_123.0440m/z	-3.10655e+16	0.002249315048882163	0.9886870184583428	9970664366525900	9857866424589330
123.04399*	0.18324765682136104	0.18904636451359888	5.85_123.0440m/z	-0.542737330420653	0.5880852261175205	1.00025e+16	7.693e+16	7694942439624790
12304732	0.16038705804958728	0.25128310627948136	1.62_140.0506n	-3069559524731530	0.002529015976614055	0.8483141441477683	4508468651044000	3824597725127430
12305521	-0.10265094263304406	0.4645190983573833	1.23_123.0552m/z	-0.5204533576669017	0.6034854967832177	0.9945354684326076	7596137588795390	7554628255151160
12305523	0.40516077082461105	0.0026168266045153788	3.88_123.0552m/z	-2.07067e+16	0.04003692191779086	0.9772753829647692	4.38403e+16	4.2844e+16
123.05523*	0.06878338889708294	0.6245653337635088	4.26_123.0552m/z	0.08720829225208633	0.9306177888165515	0.9972572955795072	3.56435e+16	3.55457e+16
12307418	0.15268622142629135	0.27506090609917794	3.24_123.0747n	-1.25086e+16	0.21285892469766984	0.996909484176952	8044309246228550	8019448181217590
12307453	0.08402378807826544	0.5497228107998082	1.01_123.0745m/z	-1.97384e+16	0.05016578675744706	0.990353999720074	4.69654e+16	4651240387326610
123079	-0.0983851132233577	0.4833789033988266	0.50_123.0790m/z	-1.02753e+16	0.30576246182003186	0.942356718808915	8211598165639670	7738254703549500
12307906	0.07437968061841843	0.596587385876199	1.28_123.0791m/z	-0.2703754167276173	0.7872288217668625	2623247981942690	0.006315983913297376	0.01656839205453988
12308037	0.03229513159822007	0.8184293180596821	0.50_123.0804m/z	-0.4270111864868937	0.6699599352250882	0.9874190875842396	5105539393251440	5041307049309730
12308039	0.23312166154919897	0.09297362115046663	4.48_123.0804m/z	-1.25694e+16	0.2106541749110996	0.9944691445720324	8201673241079780	8156310972115940
12308445	0.19575183146205444	0.16009705108617348	1.95_123.0844m/z	1804550378797120	0.07307396166970025	inf	0.0	0.04066370652145242
1230916	0.14696099210425986	0.2936744070703309	3.55_123.0916m/z	-2.52906e+16	0.012429697106568062	0.9599896228516519	4112871006064000	3.94831e+16
123.0916*	0.20127003363085466	0.1484117380962209	3.39_123.0916m/z	0.35790287860115555	0.7208997927761095	1012890649756250	2.60088e+16	2634408605259340
12309161	-0.2663844375398751	0.05384751087133794	4.16_123.0916m/z	-1.07896e+16	0.2822723116515215	0.9901499325123698	6126154453960030	6065811419148880
12309162	0.090716661792753	0.5182707436031382	4.73_123.0922n	-0.6968521375543473	0.4869324405223723	0.9907078201227264	4.09817e+16	4.06008e+16
12309793	0.04858381220456327	0.7297443302806111	3.74_123.0979m/z	0.8701200294584635	0.3855717182884039	2.46334e+16	1.25719e+16	3.09688e+16
12309961	0.12926116342558494	0.3562812439011843	3.74_123.0996m/z	-1.41492e+16	0.15908580154151272	0.9959435636895896	8824682445514280	8788885683214460
12309968	0.2348956762687017	0.09044234635085148	3.46_123.0997m/z	-2.39813e+16	0.01766034979974736	0.9561435706985434	3804648143450740	3.63779e+16
12311676	0.1885293824635169	0.17639260927381462	8.50_158.1306n	-0.1801935672773186	0.8572344718225681	0.9950487637139378	8092517657369800	8052449690299030
123.11676*	0.13720391114699484	0.3272417762496831	6.50_123.1168m/z	-1.60693e+16	0.11009182881593264	0.992126072715203	7869951849653640	7807984421054620
123.11676**	0.09067634327640066	0.5184574736012725	2.24_123.1168m/z	-1.06319e+16	0.2893409404736966	0.9927857478667574	7112192721789780	7060883570274570
123.11676***	0.11510936418591547	0.4117831849648277	5.79_123.1168m/z	0.351950955560528	0.725350016768409	1001956318129540	6868258809533370	6881695308760850
123.11676****	-0.011974599356643394	0.9321813673979108	4.17_123.1168m/z	0.4963096000571204	0.6203745783243904	1.01177e+16	6411890278419540	6.48736e+16
12311677	0.0717669591071557	0.6095806141502577	1.82_123.1168m/z	-1.39392e+16	0.16532290904660782	0.993665202789587	7197946292250950	7152348762158090
12311678	-0.07559721816062749	0.5905745943486418	4.64_123.1168m/z	0.5683354303600723	0.5706244095180508	1.00152e+16	6810962940517260	6.8213e+16
12348346	0.25630480845179143	0.06395236561450195	0.71_123.4835m/z	-1.19056e+16	0.2356355217461527	0.9927890724712805	7.56031e+16	7505791267353050
12394072	0.08535429911789247	0.5433983321469398	11.07_123.9407m/z	3.02086e+16	0.002946337160282933	1030317687688300	4598001442137920	4.7374e+16
12396433	-0.16345126529236473	0.2422209508012866	12.27_123.9643m/z	-1003914557228390	0.3169744490124189	0.997907857244562	1.02288e+16	1.02074e+16
12396734	0.09848842139542432	0.4829174511430396	12.95_123.9673m/z	-0.1301676419222107	0.8966014901351603	0.9054696297878344	0.5836203843601053	0.5284505333631783
12401476	0.02056244333969068	0.8838087618930661	1.26_140.0340n	2576295636415380	0.01091407024002496	1.03482e+16	5828065351394130	6031015065960160
12402806	0.2197359141202239	0.11389023005343375	1.93_124.0281m/z	1497947910866770	0.13616750831635466	1.02271e+16	4306651870672630	4404471598671750
12403928	0.031206531656707025	0.8244511928636287	1.81_124.0393m/z	-3.36195e+16	0.0009735026588428668	0.9917455186197396	6035518454740600	5985698380035720
124.03928*	0.20409232977551808	0.14268538103547002	3.95_124.0393m/z	-4272233218552010	3.35356e+11	0.9166825928573968	577426942695641	5293172270159590
12403929	0.261788126675709	0.05828201650557529	1.32_124.0393m/z	-2345285066613960	0.020271432631252025	0.9890384870393952	6884483250017700	6809018897645560
12404263	0.17729528034068495	0.20407012306364372	0.88_124.0426m/z	-1.76564e+16	0.07941208426620429	inf	0.0	0.048906802507231735
12404266	0.1721782223370779	0.21764350980033956	2.19_124.0427m/z	-4450826628074830	1.62047e+11	0.5501731488027615	1.13354e+16	0.6236412129261066
12404738	0.07854046985434793	0.5761524077124485	3.86_124.0474m/z	-0.02827384174732413	0.9774798813962704	1.00658e+16	3.9488e+16	3.97479e+16
12405048	0.20800322586169454	0.13502446658233178	4.21_124.0505m/z	-1715588957280350	0.08822266335003517	0.93493307105198	5337311763398070	4990029278115610
12407565	0.4697913525374035	0.0003865527553803333	1.51_123.0684n	-1.65846e+16	0.09923306671165956	0.9992192121149018	6.0167e+16	601200608530705
124.07565*	0.28581796242170043	0.03801745192354865	2.24_124.0757m/z	-2.78937e+16	0.005939446677406824	0.8787155337400163	5531811911354740	4.86089e+16
12407566	0.2966233248041261	0.031024712607064926	3.54_124.0757m/z	-3.97781e+16	0.00010620045494016347	0.9755634393065123	780502453492443	7614296579162580
124.07566*	0.4137486148076584	0.00207282304930782	4.05_124.0762n	-2.77074e+16	0.006272852767065257	0.9805758396535624	6883779540412520	6750067902830020
12407567	-0.055962100697040516	0.6906245795357517	5.74_124.0757m/z	-0.16323782641187165	0.8705424621059731	0.9928050862408736	4337204868959440	4305999053971610
12408269	-0.13986163120292838	0.3178678748068391	0.50_124.0827m/z	-1.34073e+16	0.1819587782608486	0.8989360093743863	5302054258740930	4766207496839040
12408678	-0.20522124823338345	0.1404415041553959	0.50_124.0868m/z	-0.7230720387654845	0.4707183435202914	1.07424e+16	634716938474799	6818362795352530
12409678	0.03189194643469672	0.8206584500165169	2.51_124.0968m/z	0.3954719069679139	0.6930349306212091	0.9968312083433764	3284693755987360	3.27429e+16
12409679	-0.1061989720720495	0.4491405998850068	3.86_124.0968m/z	1.58026e+16	0.11607220193303246	1.02935e+16	2.52858e+16	2602801343896720
1240968	0.1450257033193478	0.3001473880816868	1.46_123.0895n	-0.9473840303861719	0.3449083456365384	0.9981214331880136	7486135000119010	7472071795357740
12410312	-0.12962403007275594	0.35492120279078365	3.79_124.1031m/z	-0.487925220233818	0.6262878710063553	1.01175e+16	3007522136982610	3.04286e+16
12410586	-0.09015220256382032	0.5208880297884118	5.07_124.1059m/z	0.9892192298460064	0.3240877318772425	0.9877708363041058	2.44851e+16	2.41857e+16
124.10586*	0.046648523419651214	0.7401240889208078	4.04_124.1059m/z	0.4187282739179478	0.6759906612233206	1.00861e+16	3.7768e+16	3809329949451310
12410587	-0.16823759851480674	0.22851674822528656	4.95_124.1059m/z	1.46592e+16	0.14468313144542774	1178905791659260	1310391503836250	1.54483e+16
12410588	0.2141719588636017	0.12357353523464065	3.74_124.1059m/z	1.14062e+16	0.2557782273183349	1.00143e+16	1.1469e+16	1.14854e+16
12411206	0.2844068143493687	0.039019890202129946	3.66_124.1121m/z	-0.3770759207349125	0.7066296367023726	0.998657150690222	3856709267012570	3.85153e+16
124.11206*	-0.04878540478632495	0.7286658266063998	3.39_124.1121m/z	0.15781359632727798	0.8748077730743069	1.037e+16	2.89773e+16	3004959832521320
124.11206**	0.17393407954397175	0.2129167884260962	3.91_124.1121m/z	-0.02313131687911709	0.9815750862296008	1.01244e+16	4004574116083330	4054374164829410
12411208	-0.07394415899018178	0.5987447496876821	6.46_124.1121m/z	-0.7530682390013287	0.4525438753730816	0.9932064804217214	4.08408e+16	4056331176788310
12411209	-0.05672815250773487	0.6866064856046048	3.77_124.1121m/z	-2.68057e+16	0.008139547163117197	0.888002417278919	2982757548348420	2.6487e+16
12412383	0.07708900326566387	0.5832445644388691	1.15_124.1238m/z	-0.2493989084762432	0.8033803114352465	1.0128e+16	5888018434894320	596339364648192
12415412	-0.091079528439924	0.5165916930377212	4.55_124.1541m/z	-0.4559161863923156	0.6490842708042805	0.9877115920073918	5358425747844790	5292579226057180
12450001	0.242878742506464	0.07971095642373925	0.70_124.5000m/z	-0.960383623628522	0.3383483481647088	1.00043e+16	7528641703244870	7531858491213300
12452051	-0.14788831798036356	0.29060521545566376	1.39_124.5205m/z	0.6137317308678839	0.5402865122922873	1006493957405700	539059292671973	5425599207577350
12452568	-0.09640157259843217	0.4922837505174488	3.51_124.5257m/z	-0.8534099397549366	0.3947404862336714	0.8977492705209007	3305437102113160	2.96745e+16
1245326	-0.05918866772513294	0.6737590816860101	3.95_124.5326m/z	1027094858958970	0.3059657317709575	0.9975362191144208	1.06366e+16	1.06104e+16
12495611	-0.14712226616966922	0.2931391248637183	6.01_124.9561m/z	0.20889435158024436	0.8348032309098069	0.9930135891849632	4557656845953360	4525815182873560
12495628	-0.04894667885173428	0.7278033985868206	8.44_124.9563m/z	1.24287e+16	0.2157800850545183	0.9882172187068248	851590803176887	8415566949917740
12495632	-0.02124785811768037	0.8799637438038952	13.00_124.9563m/z	-0.07911412028207503	0.9370432453064734	1.00361e+16	7672210573979800	7699881545930160
12496438	0.003668984988062454	0.9791985033195816	0.50_124.9644m/z	0.13846641561995066	0.8900503887547493	1.02196e+16	6462583247072920	6604500893022070
12496706	0.13696200004888084	0.3281035663579992	0.55_124.9671m/z	-0.7583397704336808	0.4493917511828003	0.9714731104923574	4211803207879570	4091653563140450
12497121	0.16627356143702815	0.2340738803144448	1.86_124.9712m/z	292068652273679	0.004010866764733171	1.42515e+16	1.65101e+16	2.35295e+16
12497386	-0.18179619023267696	0.19263471505607546	0.69_124.9739m/z	-2.00136e+16	0.04708755637711993	0.9892820053242978	1.82329e+16	1.80375e+16
12499097	0.2201794178000996	0.11314406355749458	1.92_124.9910m/z	2807161178250660	0.005636204769955141	135598149159958	2840098274497820	3.85112e+16
12499156	-0.17127305746471766	0.2201085732480063	0.96_124.9916m/z	-1.55108e+16	0.12290877061041135	0.998128144375858	5399139633799250	5389033223910190
12500249	-0.09301481722483608	0.5076831859827831	0.67_125.0025m/z	-2806859950723190	0.005641219829844514	0.9527598084824114	6431209666976460	6127398090618730
12502086	-0.15825017668291358	0.2577369228079502	0.91_125.0209m/z	-0.5837489641997841	0.5602322987383634	0.8914200627653692	4412605029389810	3933484652257450
12502089	0.276938139013937	0.04469453259746122	1.99_125.0209m/z	1216927780007910	0.22546952686629865	1.25539e+16	2319000712390100	2.91125e+16
12502319	0.1472432217187262	0.2927380804028901	0.84_125.0232m/z	-0.30287748983216706	0.7623867264975971	0.9910072436354656	4615524819369350	4574018529174300
1250233	0.06620300385053353	0.6376479864509653	3.85_142.0266n	-1.3293e+16	0.18569139215812192	0.9821352023834372	5933597149482610	5827594637268890
12503093	0.00840099036315985	0.9523923643608984	4.11_125.0309m/z	2152742410154910	0.032876096689791114	4703403892938660	0.3997157364084095	1.88002e+16
12503448	-0.04394718282404479	0.7546892348709741	1.36_125.0345m/z	-0.6265449771529644	0.5318733185006319	0.9821495096736712	3.27096e+16	3.21257e+16
12504457	0.1816763514297658	0.1929331389447329	1.93_125.0446m/z	4070013729547800	7.44891e+10	1510619920428260	0.09252369768045396	1397681408277760
1250597	0.07003326290400531	0.6182691371548268	5.37_125.0597m/z	-0.5985841113720372	0.5503184071568421	0.9966001843266836	5977278492946830	595695684784274
12505972	0.2161878846812185	0.11999555700382032	4.50_125.0597m/z	-2412305888421910	0.01701251122045127	0.9908752287868552	726492760623135	7198636803944420
12507089	0.06692873714487554	0.6339571793173704	0.85_125.0709m/z	0.24697834734800714	0.8052497069803886	1006329708448390	4975174041910020	5.00667e+16
1250709	0.13438161500233145	0.33738473204301245	2.48_125.0709m/z	0.2908598380771457	0.7715448535056764	1.00858e+16	3299313143771680	3327626019824390
12507091	0.01193428084029106	0.9324091813116804	2.23_125.0709m/z	-0.4058411332596543	0.6854154444293303	0.9896134723280914	4536128295153220	4.48901e+16
125.07091*	0.010603769800664018	0.9399299462784868	1.09_125.0709m/z	-1.63376e+16	0.10432646942032897	0.9905290333706508	3.99199e+16	3954182649425880
12507092	0.39108960861764624	0.003784554912496789	3.68_124.0636n	-0.9784583012228422	0.32936263852579506	0.9809914960125229	6974020969661500	6841455264250940
125.07092*	0.04685011600141288	0.7390406828120004	3.88_125.0709m/z	0.14979346779644728	0.8811210523121492	0.9916712686680618	4979108544219540	4937638886882180
125.07092**	-0.12672109689538785	0.3658905406250631	1.20_125.0709m/z	-0.8077686925492178	0.4204537445861263	0.9845941177440024	5341953682583870	5259656173132990
12507093	-0.2760608814644355	0.0454032660782483	0.62_125.0709m/z	-0.13112750640501414	0.8958433945079906	1.00605e+16	3.89492e+16	3.91847e+16
12508987	0.016288680606343205	0.9078400957326176	3.24_125.0899m/z	-0.13454506397503613	0.893145010832006	1.00433e+16	6862233111110330	6891969197954010
12509019	-0.1435339182143114	0.305199477163225	0.50_125.0902m/z	-0.04321167809340063	0.9655880558963365	1.22213e+16	2.91115e+16	3.5578e+16
125.09019*	0.09906459164571843	0.4803481035220187	0.80_125.0902m/z	-1.1472e+16	0.2530547367238669	0.8554494560173891	3.90267e+16	333854115561538
12509025	0.03580284252087318	0.7990977471769104	0.57_125.0902m/z	0.1990811149065764	0.8424585316067327	1.01515e+16	1.70612e+16	1.73196e+16
12509595	0.06088095969202535	0.6649759163811917	1.05_125.0960m/z	-1.38688e+16	0.16745588141268658	1.00201e+16	5284177731547020	5294797010915880
12509605	0.030117931715193995	0.8304831097728368	0.88_125.0961m/z	-1.86867e+16	0.06354335746541892	0.9521133305457616	4.0855e+16	3.88986e+16
12509606	0.17332930179868675	0.21453664533354408	8.51_124.0888n	-0.79932650619523	0.4253164894603533	0.9948630031868082	8296812416572980	8254191717629400
125.09606*	0.05164801944734071	0.7134081869854176	0.61_125.0961m/z	-1.73991e+16	0.08384774438148301	0.9901780813848554	5174827205024610	5124000473369420
12509607	-0.07083963323105201	0.6142214226395861	4.80_142.0994n	-1.12738e+16	0.2613130679867657	1.00034e+16	8729204204262700	8732154872096420
125.09607*	-0.10486846103242246	0.454874436520251	5.95_142.0994n	-1.81118e+16	0.07203733191316934	0.9945869692125144	7556654289644	7515749887323770
125.09607**	0.06370325583668877	0.6504271699875199	5.55_125.0961m/z	-1842135701372120	0.06735386541927826	0.989311283118384	7660720217577330	7.57884e+16
12509747	0.013909888141555459	0.9212529701606093	3.74_125.0975m/z	-0.5505374176011074	0.5827383145572316	1.00582e+16	7131906422463250	7173437993822230
12510015	0.02648926524348388	0.8506577116998533	1.46_125.1002m/z	-1.2868e+16	0.20007018825188028	0.8848747060468534	1.71959e+16	1.52162e+16
12510729	-0.08124181044995435	0.5630593415644662	4.24_125.1073m/z	-1.39748e+16	0.16425431294784704	0.9557091261374648	2970187759998700	2.83864e+16
125.10729*	-0.027871333694107124	0.8429617881287805	3.56_125.1073m/z	-0.4279623080232201	0.6692687944320621	0.6224640251700788	1.05005e+16	0.6536172260412512
1251073	0.05156738241463603	0.7138364932752677	3.98_142.1106n	-2.93162e+16	0.003879501558898207	0.9854259559201344	6807358536078870	6708147792706600
12511211	0.2502973495152936	0.0706633487250647	3.74_125.1121m/z	1.09352e+16	0.2758521233659129	1.00126e+16	1.34008e+16	1.34177e+16
12511213	-0.19070658234654295	0.17135896854797547	8.32_125.1121m/z	0.5188644171764969	0.6045905601994608	1.00451e+16	4800367526778980	4822031752388850
12511214	-0.057736115416543235	0.6813325992425079	5.76_125.1121m/z	0.4746409126506756	0.6357067044673477	1.00535e+16	6006315774756070	6038458129475410
12511542	0.045358330896376496	0.747069655355063	4.73_125.1154m/z	-0.6128964578136648	0.540837278208492	0.9653487473302724	2.29684e+16	2.21725e+16
12513017	0.002298155432083076	0.9869696207021754	1.50_125.1302m/z	1.29633e+16	0.19677466759758225	1.00364e+16	5.16327e+16	5.18205e+16
125.13017*	0.03987501267245898	0.7768050218613631	1.99_125.1302m/z	0.13122233587733692	0.8957685039185028	1.00211e+16	2.43895e+16	2444106722480180
12513018	-0.12446325997965713	0.3745625109906905	1.14_125.1302m/z	0.8780099665163129	0.3812885692726915	1.00207e+16	1.05596e+16	1.05814e+16
12513243	0.11365789759723142	0.4177435316795993	10.39_125.1324m/z	-1723493341487080	0.08678061316222134	0.6459457157346388	2.62703e+16	1.69692e+16
12595117	-0.02717468002147356	0.8468392695062139	1.14_125.9512m/z	-0.02324528807992544	0.9814843205429316	0.9523701465907514	4257873848638260	4055071941392550
1259609	-0.11285152727018473	0.4210760287058676	3.35_125.9609m/z	-0.6156760887053352	0.5390055313756457	1.00015e+16	5406056606947000	5.40689e+16
12596092	0.10958572744564564	0.4347264547365953	0.61_125.9609m/z	-1.1491e+16	0.2522721929648113	1.00264e+16	4174842592092130	4185871454276370
12596095	-0.05076101208758935	0.7181243494783942	1.33_125.9609m/z	0.2435405916758953	0.8079066106259488	1.00491e+16	421735377115837	4238059935827580
12596411	-0.05692974508949655	0.6855505135793634	8.57_125.9641m/z	0.9953864720567774	0.3210897882074987	1.00075e+16	9616090210003030	9623285811712480
12596413	-0.00483822196228016	0.972571682867804	0.56_142.9673n	0.4297584929524133	0.6679643524907353	1.00047e+16	7679707906691310	76832993562645
1259722	-0.0786211068870526	0.5757595597181945	12.99_124.9649n	-0.22486584433759849	0.8223779191462879	0.9968297508213736	9195805409025880	9166652414481110
12597221	0.12426166739789545	0.3753427421585298	0.53_125.9722m/z	0.14749545647176635	0.8829314243440547	0.986278591265372	5931518668570280	5850129876501750
12598619	0.2095353294830833	0.13210886874215896	0.70_125.9867n	-1.88174e+16	0.06173412656682763	0.9975126897918742	1.31396e+16	1.31069e+16
12600072	-0.13486543719855945	0.33563216180348304	0.70_126.0007m/z	-0.5434677368959934	0.5875835664938115	0.9988222716429008	6181868398503430	6174587836790660
12602185	-0.07841951430529093	0.5767419097168117	0.81_125.0146n	1.07831e+16	0.2825616980708209	101381303947126	8592652333333380	8711342979176530
12602747	0.02790432619617186	0.8427782470847178	4.51_126.0275m/z	1555010519531680	0.12196997369529088	0.946970388685272	0.15910133378291835	0.1506642518927554
12602977	0.2304606394699449	0.09687355628708702	1.82_126.0298m/z	-1.87591e+16	0.06253556909876003	0.9820040069004672	5630680931709590	5529351236516870
12605249	0.2155427884195811	0.1211318402449407	0.88_126.0525m/z	0.9065680783370612	0.3660334098366673	1054855573764170	3857136666486970	4068722111413940
12605489	-0.1679266206074739	0.22939051383564704	0.87_126.0549m/z	-0.4005466048676393	0.6893019790816776	0.9901108741655918	6129233671188620	6068620908145750
12605492	0.07055740361658566	0.6156368343538782	3.98_125.0476n	1.5862e+16	0.11471977593142064	1.01509e+16	6121251312201930	6213628463314640
126.05492*	0.020481806306986008	0.8842612933486789	3.55_126.0549m/z	-0.1894248339325553	0.8500060978638416	1.00269e+16	7121561376743070	7140740628166680
12605495	0.10434432031984213	0.4571441547396645	1.19_126.0550m/z	-0.670912270319504	0.5032685509737918	0.9994123527457448	6612339518253060	6608453795090960
12606614	0.08716863235374755	0.5348310861912613	1.79_126.0661m/z	-0.39030628385306215	0.6968425098862321	0.9934075643115596	4706932879912570	4675902727611940
126.06614*	0.02669301022699295	0.8495222903805341	1.33_126.0661m/z	0.5694081536919533	0.5698981656869018	0.9054028062677866	1.20885e+16	1.0945e+16
12606615	0.13405906687151276	0.3385562764256961	0.98_126.0661m/z	-1.00088e+16	0.31843472626745506	0.9904485677215298	5386230042176850	5334783830692740
12609129	0.044068138373101785	0.7540352080368552	4.06_126.0913m/z	-4129169458546100	5.9148e+10	0.9726047483083567	7537970275501860	7331465682560360
12609943	-0.0857171657650635	0.5416795947338746	4.77_126.0994m/z	0.7163578286760104	0.4748414553008026	0.9562600476322964	4017604279840060	384187446000758
12610252	0.2640056450750874	0.05610715967036775	0.79_126.1025m/z	-1554918735857740	0.12199183386280033	0.9891133901318416	6383646077265870	6314149812886280
12611547	0.2660215708927041	0.05418735976338602	3.74_126.1155m/z	1.23635e+16	0.21818754183805428	1001557087122860	1.09756e+16	1.09927e+16
12612768	0.12228606009663105	0.3830404501263249	12.90_126.1277m/z	-0.4900248140981896	0.6248047815670748	1.07557e+16	5352754891776230	5757280157853470
12613944	0.04164975890081017	0.7671437147747174	1.14_126.1394m/z	0.048103268595181305	0.9616954702681504	0.5854728071166355	0.6594073979901424	0.3860651003347652
1261822	-0.11369821611358374	0.41757730357370937	1.15_126.1822m/z	-0.0019129174514471005	0.998476157632358	1.01469e+16	450378476840738	456995061394257
1269554	-0.017498236096913245	0.9010295192342884	6.11_126.9554m/z	0.12372707328799558	0.9016906469792983	0.9981552627735848	7151724998078490	7138531944741450
126.9554*	-0.0032657998245391073	0.9814839593151314	9.90_126.9554m/z	0.971595953126038	0.3327556622147392	1.00962e+16	5922336249407210	5.97928e+16
12695541	0.13696200004888084	0.3281035663579992	0.56_125.9481n	-2274434017667060	0.024302849206752963	0.992813770783278	6894263038704830	6844719284228330
12695979	-0.1174881566507032	0.4021214337534522	8.69_126.9598m/z	0.6199459541635713	0.5361978642405562	1.00503e+16	6.71265e+16	6.74645e+16
1269598	0.012458421552871413	0.929448026017022	8.10_126.9598m/z	1289224909273370	0.19922822878771626	1.10989e+16	2.64597e+16	2.93673e+16
12695981	0.0030238887264250995	0.9828553048590202	0.50_126.9598m/z	0.8879301754065441	0.3759452909268871	0.9902585196231524	5466183768526540	5412935046609200
12696169	0.19147263415723734	0.1696129301560655	3.62_126.9617m/z	-0.2278505780200926	0.8200607708349225	1.01896e+16	4092569794149350	417016368430062
126.96169*	0.07398447750653411	0.5985448871094979	2.15_126.9617m/z	0.08895213373527146	0.9292340452361724	0.9824558334251248	3444149895741180	3.38373e+16
126.96169**	-0.011692369742177055	0.9337761769773744	1.68_126.9617m/z	-0.7906933125163751	0.4303233840801979	0.987942639197088	3.52138e+16	3478919982095180
126.96169***	0.09611934298396584	0.4935576825881439	1.65_126.9617m/z	0.037104320573711665	0.9704492651800379	0.9938285590104076	3.5776e+16	3.55552e+16
126.96169****	0.2159862920994568	0.1203497721415592	1.29_126.9617m/z	-1.90782e+16	0.05825122611640551	0.8939724088060657	2973555220730450	2.65828e+16
126.96169*****	0.14938010308539992	0.28571190963313503	1.37_126.9617m/z	0.3794984204517217	0.7048338744406755	0.9515833024846094	2888906289434330	2.74903e+16
1269617	0.028626146610157614	0.8387647681251473	4.01_126.9617m/z	0.8045724425965001	0.4222909121031905	0.9708716625272888	3329891369765210	3.2329e+16
126.9617*	-0.04737425671399323	0.736226182866869	3.20_126.9617m/z	-0.10207886302298227	0.9188251705318404	0.9397225772989138	3.43077e+16	3223974286324700
12696426	-0.0844269732417888	0.5478025904818459	8.44_126.9643m/z	0.8794099228143717	0.38053167740222105	1.27154e+16	0.4977642936302564	0.6329263123215547
12696745	-0.10285253521480574	0.4636377752706893	13.00_142.9867n	-0.2787999164673472	0.7807676172670068	0.9954376850710822	9361700750441820	9318989723348020
126.96745*	0.1899405305358486	0.1731180258915071	0.50_126.9674m/z	-0.9866296883253022	0.3253519973891499	0.9884169278704786	7194870028416850	7111531329915160
12697146	-0.17482108690372308	0.21055652724788504	0.96_126.9715m/z	-1743195536149200	0.08326971607131732	0.99704146631624	7401929515450910	7380030657654630
12697193	-0.11458522347333512	0.4139298636190932	0.56_125.9647n	0.7586351313507104	0.4492155121667185	1.006e+16	8028912216589460	8077078187927080
12698954	0.10777139420979057	0.4424158503943581	0.70_143.9928n	-1.82283e+16	0.07024323692175907	0.9964543279703334	9892464491455380	9857389056803560
12700268	0.035601249939111505	0.8002056453632079	0.70_208.0269n	-0.17618985773951082	0.8603733029312798	1.00386e+16	7493079120772420	7521981083439670
12701542	-0.10031246868460864	0.4748082514424	5.65_127.0154m/z	-1.56747e+16	0.11903181551472887	0.9758028667581224	5442388027102540	5310697838856740
12702319	0.12510835624129446	0.3720723168122109	1.42_127.0232m/z	-0.07622128942932395	0.9393407092705586	1.00027e+16	6162004107584890	6163692784007870
12702516	0.00776287939983614	0.9560047759003364	0.81_127.0252m/z	0.8400225764889687	0.4021812958591097	1.09512e+16	3625089019226900	3969923162251100
1270365	0.20183449285978733	0.14725305764068908	2.12_104.0473n	-0.008086361476265541	0.9935584190417844	1016819379407970	4430373996076680	4504890137235930
12703888	0.0625743373788234	0.656231551800618	0.82_162.0527n	0.2200547598770521	0.8261162108002138	1.00253e+16	1.07334e+16	1.07606e+16
1270477	-0.05813930058006659	0.67922725124381	1.22_104.0585n	-2.30632e+16	0.022409026586175287	0.9590799687960524	5785033243502150	5.54831e+16
12705013	0.16949904274521493	0.22499601680127126	0.94_127.0501m/z	-0.3949935783337152	0.6933871796172237	0.9798863756790582	5450562205867140	5340931645320400
127.05013*	0.12914020787652794	0.3567352982817145	2.98_127.0501m/z	-1.19205e+16	0.2350525905999671	0.9805109978468732	4425471426847860	4339223404681420
127.05013**	-0.017538908166824387	0.9008006293085457	2.33_143.0694n	0.4543894782002006	0.6501801347517877	0.8968451057508765	0.7497705098344876	0.6724280121813996
12705015	0.08692672125563354	0.5359695548093147	3.52_127.0502m/z	-0.8871420745959101	0.3763680678139593	1.00055e+16	6084252766049010	6087622695446760
127.05015*	0.15921782107536958	0.2548007540949917	1.52_127.0502m/z	-0.028188375312018232	0.9775479372517468	0.9925046847672984	5013095453186680	4975520722473420
127.05015**	0.19187581932076067	0.16869917804939652	3.15_127.0502m/z	0.9124785226056892	0.3629248518251388	1.02499e+16	3.76936e+16	3863563796440290
127.05015***	0.057055301316004566	0.6848931322070921	2.53_127.0501m/z	0.7643661547618646	0.4458037107193889	0.9808987918980748	2084939667150800	2045114800688600
12705016	0.1160770085783715	0.4078369655801529	1.42_144.0534n	-0.4590195417643157	0.6468590612952221	1.00923e+16	4326372705195210	4366323222112880
127.05016*	0.03285959082715275	0.8153109281983859	1.86_127.0502m/z	1.47473e+16	0.14230085564318468	1037826888457640	3992815832279070	4143851631398590
127.05016**	0.20659207778936284	0.13775232164768014	1.72_127.0502m/z	0.008011465393211662	0.9936180798357594	1.00381e+16	3.63658e+16	3650434921662370
12705018	-0.10309444631291974	0.4625813816058756	3.75_127.0502m/z	-1708396909439810	0.08955164888330377	0.9954329409849251	7579810001170840	7545192561572440
12705019	0.3051708502708211	0.02628329675054822	4.35_127.0502m/z	0.370062738558796	0.7118376734127831	1.01688e+16	360682700485484	3.66772e+16
1270691	-0.015038806599420827	0.9148845982827828	3.24_127.0691m/z	0.6686278689597627	0.5047210712202741	10006499170314	1.02575e+16	1.02642e+16
127.0691*	-0.15913718404266494	0.25504456912493784	5.10_127.0691m/z	-0.4003937537469661	0.6894143055715927	0.998958723296129	2.84245e+16	2839490398620360
12707259	0.1695796797779196	0.22477224189770464	0.94_127.0726m/z	-3.04583e+16	0.0027250404891931155	0.9963010518032543	9868384959506830	983188231475608
12707285	0.39487954915476575	0.003431842439377792	2.72_127.0728m/z	-0.6050329874896149	0.5460361745267577	0.997569332911848	7.07857e+16	7061361513135190
12707294	-0.05479286372282281	0.6967737676128157	2.53_127.0729m/z	-0.3252575682666139	0.7454219580180108	0.9957311585904268	7.71162e+16	7678704589191490
12707531	-0.023586332066115774	0.8668666221753112	3.88_144.0786n	-0.5086733384326473	0.6116998518702361	1.00183e+16	7375433803861260	7388910676640540
12707532	0.06749319637380823	0.6310926408178472	4.79_127.0753m/z	-2130571252872610	0.034692214264017994	0.9918059102107462	7581739676175260	7519614220509930
12707533	0.12954339304005127	0.3552231590134685	4.43_126.0681n	-2.30371e+16	0.02255924466991465	0.9927920502448084	8897137499822330	8833007379758580
12708652	0.1268823709607972	0.3652758026876971	3.86_127.0865m/z	1927633047916800	0.05571762374994098	1.04981e+16	2.65504e+16	2.7873e+16
12708653	-0.005563955256622184	0.9684593795819382	0.95_127.0865m/z	-2.98005e+16	0.003343940880646061	0.9747613093357934	5621734082685810	5.47985e+16
12709463	0.016933776867980557	0.9042069387657592	4.06_127.0946m/z	-5011583054586450	1.44914e+10	0.8864208730722405	4759786499426040	42191741044587
12709957	-0.08724926938645222	0.5344518598214353	3.77_127.0996m/z	-0.6667589430586178	0.5059110716923421	0.978115660581322	3.03567e+16	2.96924e+16
12711169	0.182521923527019	0.19083451647533745	8.76_127.1117m/z	0.8670046716647984	0.3872710698210899	0.9979032207651848	595345148390642	5940968410459480
1271117	-0.0850317509870738	0.5449283065081398	5.44_127.1117m/z	1.3853e+16	0.1679376666460576	1.0057e+16	7.19247e+16	7.23346e+16
127.1117*	0.11922185285385363	0.3951637036407015	6.12_127.1117m/z	-0.2993107218489656	0.7651013664217234	0.9921204896372036	6379051018987760	6328787220378840
12712291	0.2239290398208667	0.1069841034881302	3.37_126.1156n	-0.8024852290722054	0.423493177676322	0.9623812645669504	3745025861482470	360414272440944
12712292	0.21687329945920816	0.11879714862583445	12.69_127.1229m/z	0.4602324440572947	0.6459902341555226	1.00106e+16	2310338079590470	2312790265354630
12713973	-0.10466686845066077	0.4557466753804289	1.14_126.1325n	1288610428697280	0.1994413421687459	1.00163e+16	1.14315e+16	1.14501e+16
12714269	-0.08182276520658457	0.5602618332842895	1.15_127.1427m/z	1.75482e+16	0.08125322446650328	1.88187e+16	0.08158664564039547	0.1535354599181762
12714808	0.1015220241751787	0.4694711814765669	10.45_127.1481m/z	-2295921458931550	0.023011844759581703	1.03813e+16	2.21431e+16	2.29875e+16
1274571	-0.0312871686894117	0.8240047795802405	5.87_127.4571m/z	0.8719819552658408	0.3845582827163774	1.03322e+16	3122052834411370	3225779107194160
127.4571*	-0.08406410659461777	0.5495306440193211	4.93_127.4571m/z	0.4134875914306011	0.6798172637395841	1.01055e+16	2.61054e+16	2638089780900410
12745711	-0.04277794584982708	0.7610202312937404	9.21_127.4571m/z	0.43269653816583664	0.6658328409021814	1.05021e+16	4953419245568040	5202119303869110
127.45711*	-0.1461949402935655	0.29622567991325705	9.06_127.4571m/z	1.51434e+16	0.131963051582973	1.04316e+16	2.86731e+16	2.99105e+16
127.45711**	-0.056244330311506864	0.689143237776045	5.20_127.4571m/z	-0.4933598887588307	0.6224521384670836	1.01619e+16	2337604474616280	2.37546e+16
12745712	0.15220239923006335	0.2766029363851509	4.44_127.4571m/z	1.65583e+16	0.09976709332372542	1.10404e+16	2.59631e+16	2.86642e+16
1279676	0.0689849814788446	0.6235480020170425	0.50_127.9676m/z	-0.35836531460931537	0.7205544285163872	0.9990958062114932	4965411825013470	4960922130483910
12797205	-0.19864933006795288	0.153879936976491	13.00_127.9721m/z	0.033336872959510426	0.9734485654793066	0.9867340983421244	3.03536e+16	299509583460737
12797526	0.3687128320421005	0.006593499491449848	0.55_127.9753m/z	-0.5679874928013524	0.5708600620968571	0.9716671931502252	4111631901388460	3.99514e+16
12798222	0.23263783935297105	0.0936734544920983	0.70_144.9855n	-1.87713e+16	0.06236809157429104	0.9977855991691452	8361435681112140	834292011099275
12798914	-0.22126801774161264	0.11132841052672482	5.63_127.9891m/z	-0.7065900910313817	0.4808752818082486	0.9559138070607196	1.97883e+16	1.89159e+16
1279929	0.1861005027678085	0.1821333421362988	0.71_127.9929m/z	0.2324818755886621	0.8164684846941297	5462706331648710	0.024695493305903163	0.1349042276453456
12800436	0.07402479602288642	0.5983450539027061	0.70_128.0044m/z	1.16518e+16	0.2457232228524204	0.944015748622754	2.85124e+16	2.69162e+16
1280172	0.11890170157233362	0.3964432020482072	0.71_128.0172m/z	0.6015092654394499	0.5483739560170009	0.9653925912694497	4330779931136460	4180902859937560
12801918	0.17969962738235562	0.19790322573390806	0.70_145.0225n	-0.952514034878354	0.3423098648122984	0.9980649071341792	1304996376140890	1.30247e+16
12801919	0.08297550665310474	0.5547303941501656	2.28_128.0192m/z	-0.061732115765838626	0.9508551844475512	0.9997045685948028	8258905187514370	8256465247549430
1280192	0.10228807598587306	0.4661077564697949	2.92_128.0192m/z	0.9132187435902059	0.3625367166451854	1000546660055930	958097844361708	958621598182896
128.0192*	-0.10172361675694036	0.4685848095619121	1.00_128.0192m/z	-0.4283160148548607	0.6690118423622013	1.00068e+16	7594790005423430	7599927649951010
12801921	-0.017780465711379586	0.8994413831213535	1.55_128.0192m/z	-0.7417731783188706	0.4593400647976982	0.9995802250491256	8820356602799850	8816654038040210
12802293	-0.03080334649318368	0.826684083084181	1.25_128.0229m/z	2.74874e+16	0.006688404037703282	1.02136e+16	7831100449525310	7998399275408730
12803408	-0.26142526002853794	0.05864428559167146	0.70_128.0341m/z	-1.44201e+16	0.15130305223620086	0.8626230845254361	2877659496889080	2.48234e+16
12803413	-0.1642173171030591	0.2399907164642766	2.03_128.0341m/z	-1.52852e+16	0.12840978472440387	0.9558511961939749	2960450411604800	2829750067205390
12804225	-0.10369922405820477	0.4599461058457626	4.24_128.0423m/z	-1.78693e+16	0.0758904706345534	0.8824048848368247	1.72654e+16	1.5235e+16
12804535	-0.11551254934943883	0.4101362630637184	1.05_128.0454m/z	0.8846309762409542	0.3777171216512731	1.01442e+16	3.41932e+16	3.46861e+16
12804537	0.027819776283110918	0.8432486244433708	2.18_128.0454m/z	-0.36163768332238333	0.7181121511478825	0.996575409434485	3722789607095240	3710040576929390
128.04537*	0.16369317639047873	0.2415151435550053	2.48_128.0454m/z	-1.22353e+16	0.22297343973793948	0.9717569077792838	2777709479036340	2.69926e+16
12804538	0.01451466588684048	0.9178407075290509	3.61_128.0454m/z	-0.1980680452373985	0.8432496965896561	0.9890788332809279	3256552157126730	3220986808089400
128.04538*	0.1365588148853575	0.3295430542820922	4.25_128.0454m/z	-0.12539637886506136	0.9003712081142976	0.9931858528969446	2.37516e+16	2.35898e+16
12805348	0.10523132767959348	0.4533067081864189	3.75_128.0535m/z	-0.7350151621098447	0.4634337781612966	0.9984040524144858	1229384755038560	1.22742e+16
12807054	0.08797500268079425	0.5310447589659697	0.56_127.0633n	0.6065584897524671	0.5450256433240912	1001813538861430	6818023949644570	6.83039e+16
12807598	-0.027456909635939903	0.8452679781630662	0.95_128.0760m/z	0.10287805504002001	0.918191884043998	1004745607215310	6039380885520820	6068041415027180
1280762	0.343473440805539	0.011801684321468078	2.74_128.0762m/z	0.3265621179693364	0.7444368134788842	0.9823727844371668	1.38101e+16	1.35666e+16
12807862	-0.22792057293974785	0.10071349104867086	3.71_128.0786m/z	-0.6480734061303901	0.5178901920110187	0.9417342123624808	1276396121868130	1202025896490010
12807865	-0.11510936418591547	0.4117831849648277	4.15_128.0786m/z	-1.44358e+16	0.15086279395566599	0.996014838861142	2.20036e+16	2.19159e+16
12810692	0.2758189703663215	0.04560031344007345	3.40_128.1069m/z	-5363401463105420	2.89682e+09	0.9667423601162648	7682628682174500	742712258410229
12810693	-0.03588347955357785	0.7986546976174789	4.96_128.1069m/z	-1.25287e+16	0.2121267282823603	0.9766677614044772	9103804319328640	8891392184823110
12811503	-0.27150488911662163	0.04923329039681449	5.14_128.1150m/z	-1.02787e+16	0.3056019978095213	0.8932866627973436	1.01993e+16	0.9110874638853216
12811505	-0.24420925354609105	0.07802433949396596	4.79_128.1151m/z	-0.6133850740425301	0.5405150579639549	0.9845371489370156	2.44562e+16	2407808128320130
12814309	-0.09220844689778937	0.5113855298696331	1.14_128.1431m/z	0.7433067156346751	0.4584139691312109	1.00323e+16	7405832851614760	7429765783256220
12814332	0.3462150999174977	0.011102558234235513	3.99_128.1433m/z	-1385864460933920	0.16776622031271227	1.00248e+16	6254231866680740	6269748882659400
12894741	-0.1523636732954727	0.27608829232655113	2.06_128.9474m/z	-1.01366e+16	0.3123153569354672	0.9943088051008958	2.2188e+16	2.20617e+16
12894742	-0.24025803894356226	0.08311707629186267	2.38_128.9474m/z	-2.25707e+16	0.0253921309734294	0.9837662461016652	2.22305e+16	2.18696e+16
12894749	-0.10627960910475416	0.44879437824429824	2.80_128.9475m/z	1.30994e+16	0.19214117589621005	0.9745377632341916	0.26613249726824273	0.25935616861172284
12895069	0.1875214195547085	0.17875886553516232	0.55_163.9645n	-1.62607e+16	0.10595348526283377	0.9983243113415906	9898689450146690	9882102328501960
12898641	-0.10019151313555164	0.4753437300050205	1.01_127.9791n	-0.8696946307079173	0.38580349138303294	1.00636e+16	7106253192341490	7151426408383020
12900316	-0.0668686175728426	0.6342625911241695	1.86_129.0032m/z	1.31626e+16	0.1900158619157346	4.94976e+16	0.005498743776836678	0.2721747318805881
12901622	0.2616268526102996	0.05844280168307708	0.70_128.0089n	-0.5130263458025354	0.608658622077916	0.999690490239478	6920865031972590	6918722956693940
12901814	-0.1066424757519252	0.4472382009756128	1.85_146.0214n	1298242593144660	0.19612002796931532	1.022e+16	9282474736325240	9486722756455560
12901987	0.051446426865579035	0.7144791167551028	1.99_129.0199m/z	-2.1148e+16	0.036036442781482686	0.968539792642552	5817544161267250	5634523015642670
12902249	0.2007458929182743	0.14949369213537578	0.70_146.0258n	-0.9433009588657836	0.3469855817141945	0.9987046760032028	9579727550512350	9567318699533390
129.02249*	-0.12220542306392634	0.3833566220148392	1.99_129.0225m/z	-1709450751836430	0.08935590245805278	0.9328844267111508	2.42331e+16	2.26067e+16
12902251	0.10720693498085787	0.4448234093397664	2.27_129.0225m/z	0.37107740010483947	0.711083331588193	1.00495e+16	4160643956870970	4181257244217070
12902541	0.09070916449079898	0.5183054638348257	0.70_129.0254m/z	2503857560387110	0.013313258491082006	inf	0.0	1.06936e+16
12902938	-0.15127507335395965	0.2795744468919381	0.84_145.0487n	-2494643283609500	0.013649988592328566	0.9224932737026096	5.19709e+16	4794280756497690
12903321	-0.02072371740510002	0.8829038094653258	1.86_129.0332m/z	3.01991e+16	0.0029550885489200217	1.17131e+16	1.74428e+16	2043088386668570
12905213	-0.01830460642395994	0.8964930283516861	0.73_129.0521m/z	-0.7015132443493293	0.4840279786393822	0.9900713864362412	6.87822e+16	6809926895102390
12905218	0.014796895501306825	0.9162488168991711	1.46_129.0522m/z	-0.6355699204039661	0.5259880139665409	0.9922988367084375	7274623938318730	7.2186e+16
12905679	0.2848906365455968	0.03867377182570269	4.35_129.0568m/z	-1.03437e+16	0.3025632109048708	0.9864085712848352	5192403662402810	5121831478164900
12905681	0.048745086269972614	0.7288814857344538	3.75_129.0568m/z	-0.4101597344609413	0.6822515112103555	0.9986280824402042	9108638143734120	9096141843118910
12905709	0.10204616488775904	0.4671684858524266	5.16_129.0571m/z	-0.6679526191830135	0.5051508507947289	0.979378274414912	3495419808530730	3423338220434530
12906575	0.2403386759762669	0.0830105940532916	0.92_129.0658m/z	-1.6404e+16	0.10293770122977793	0.9897016856882318	1.07622e+16	1.06514e+16
12906577	0.2640056450750874	0.05610715967036775	2.79_129.0658m/z	-0.11609301749689335	0.9077281347184594	0.9928091249863428	6401344241391420	6355312975032180
12906578	0.21594597358310447	0.12042071036940336	2.23_146.0691n	-1.3051e+16	0.19378001594400196	0.9801129668314316	5.75364e+16	5639217394137500
129.06578*	0.2373954242825465	0.08696723679454517	3.37_129.0658m/z	-1170413556559450	0.2436194554292997	0.9829640252859068	4.50715e+16	4430367085355850
12907386	0.012297147487462074	0.9303590516463224	1.09_129.0739m/z	-1.22194e+16	0.2235738955645821	0.9676302464771565	3539715678474970	3.42514e+16
12909093	-0.12518899327399913	0.37176174429633857	8.95_129.0909m/z	-0.7288320764268797	0.4671971356306952	1007125437928190	5855088978688900	5896809051770630
12909096	0.03156939830387805	0.8224427689730733	4.63_164.1048n	-0.8350142023081861	0.40498668310649055	0.9929826922250696	680758089802417	6759810007659990
12910214	0.12668077837903552	0.3660443229239333	1.07_129.1021m/z	-0.9546812710828716	0.3412159109889877	0.9883056580520276	5149519110760550	50892988734117
12910216	0.10252998708398704	0.4650483260096632	4.20_129.1022m/z	-2.09486e+16	0.03779926856515501	0.9970729246631193	6312387367408050	6293910534028080
12912728	0.27602056294808314	0.045436058871479584	0.86_129.1273m/z	0.21062625203642446	0.8334537935767031	1.01082e+16	2.55133e+16	2.57895e+16
1291273	0.1284144745821859	0.35946704696150233	2.82_129.1273m/z	-0.10465956120216376	0.916780392724078	0.9695450413423032	2842811796557560	2756234080821780
129.1273*	0.09781272067076388	0.4859398428589122	2.71_129.1273m/z	-0.1483983408763765	0.8822200583414996	1.15039e+16	2124543200595080	2.44405e+16
12912731	0.018869065652892626	0.8933194284328116	8.63_129.1273m/z	-0.3238167507241413	0.7465104952743554	0.9974051762880569	5500309277314180	5.48604e+16
129.12731*	0.16139502095839567	0.2482771565784614	0.65_129.1273m/z	1.16044e+16	0.24764225980562204	0.9972105853270784	3716311161575840	37059448286926
129.12731**	0.12103618608970865	0.3879585196090636	2.29_129.1273m/z	-0.634647075253609	0.5265882693801514	0.9724409339211332	3.68544e+16	3583871162133700
12912732	-0.034351375932189135	0.8070832423846577	5.13_129.1273m/z	-2.81048e+16	0.005581217167914778	0.967976443790062	602191936912475	582907609571587
129.12732*	-0.1974800930937352	0.1563669629271241	2.12_129.1273m/z	0.3218273837348468	0.7480143007569368	0.9995256070652924	2.80742e+16	2.80609e+16
129.12732**	-0.06334038918951776	0.6522906425203328	2.46_129.1273m/z	-0.06350269553116887	0.949447508619852	1.14954e+16	2540568153972660	2.92049e+16
129.12732***	0.3369418411564608	0.013621514585771266	1.32_129.1273m/z	0.3699160721453045	0.7119467349380058	0.9844875377912408	3299222337455030	324804327562697
129.12732****	0.29202701393996006	0.033855800046595115	3.21_129.1273m/z	134585968897224	0.1803004470253124	1.00423e+16	2.80158e+16	2.81342e+16
129.12732*****	0.3713335356050023	0.006190461773351096	1.50_129.1273m/z	-1.8467e+16	0.06668502889738513	0.873086513909673	3.4783e+16	3.03685e+16
129.12732******	0.3095252500368732	0.024111590323443545	2.48_129.1273m/z	1.0896e+16	0.27757116925048675	1013282770534480	3.15573e+16	3.19765e+16
12912733	0.14861405127470556	0.2882178975545089	4.92_129.1273m/z	-0.7304012908405719	0.4662404106310197	0.991236998240578	5569500193220510	5520694653228220
129.12733*	0.05322044158508176	0.7050738764091591	3.14_129.1273m/z	-0.3773623448296097	0.7064172286754404	0.9623754375530308	3477943346440760	3.34709e+16
129.12733**	0.016449954671752545	0.906931628167688	8.84_129.1273m/z	0.8396456732820141	0.4023920038232307	1.01865e+16	2.0265e+16	2.06428e+16
12953609	-0.025763531949141848	0.8547044732626002	4.55_129.5361m/z	1.20092e+16	0.2316029323635368	1.00345e+16	6704142730613240	6727271758806390
12954297	-0.1806709137828508	0.19544987906782854	4.84_129.5430m/z	1.67033e+16	0.09685918133791467	0.9812763747260708	100289025978663	0.9841125183715116
129.54297*	-0.09832696496690722	0.4836387394979649	4.94_129.5430m/z	1.52167e+16	0.13011688728469445	1.38761e+16	0.4676251909264294	0.6488830184836067
12958166	0.09628061704937517	0.4928295117968519	0.91_129.5817m/z	-1.78661e+16	0.07594207064643163	0.98997375758034	6790401541478220	6722319329496530
12995408	0.12986594117086994	0.3540162777331469	0.55_129.9541m/z	-1.38919e+16	0.16675585895636924	0.9908993344931012	5745948823395250	5693656865133770
12995856	0.04685011600141288	0.7390406828120004	8.76_129.9586m/z	0.6314676737747542	0.5286589805139841	0.9898230089255452	40901567291875	4048531240661430
12995858	0.1853039011553301	0.1840450903572481	12.89_129.9586m/z	0.05048668798698597	0.959799142511964	0.9944880185138028	4805557743067610	4.77907e+16
12997911	0.1869166418094235	0.18018956903997396	0.70_128.9718n	-1465561964321180	0.14478031048913598	0.9977111878384434	9467300950178380	94456320766265
13000789	0.04249571623536074	0.7625507493814315	1.01_130.0079m/z	-1.0056e+16	0.31616311334700314	0.9954363548465072	6822441145808360	6.79131e+16
130.00789*	0.09450660232987246	0.5008700189345697	3.81_130.0079m/z	-0.6077948634721886	0.5442073265655087	0.9960653215724012	5878241945505230	5855112953730050
13000791	-0.11486745308780147	0.4127731623947876	0.67_147.0112n	-2.76385e+16	0.006400374252004944	0.984162006472998	9266007339211750	911925237495217
13000792	0.1908678564119523	0.1709903009686614	4.16_130.0079m/z	-0.02638795870490916	0.9789816240930708	1001635798179710	7176426503901080	7.18817e+16
130.00792*	0.04785807891022125	0.7336312265532576	7.79_130.0079m/z	1.64568e+16	0.10184316494015716	1.00914e+16	6.7261e+16	6787589231675720
130.00792**	-0.008104021786819267	0.9540734202253728	3.88_130.0079m/z	-0.6066751264748289	0.5449484188132543	0.9958029285306642	5508689538231500	5485569174537160
130.00792***	-0.0011692369742177054	0.9933702968499908	7.50_130.0079m/z	3.19437e+16	0.0016958464876397222	1.02089e+16	5.3827e+16	5495114015596420
13001681	0.04100393113032436	0.7706554739106981	5.70_130.0168m/z	0.8956634383360479	0.3718124983202799	1.00843e+16	4942303718592690	4983984333133000
13001943	-0.005886503387440861	0.9666319440900412	1.25_130.0194m/z	1.31825e+16	0.18935073047475767	1.05948e+16	4616640977186360	4.89126e+16
13002157	-0.036384869672640915	0.7959012921224824	1.19_130.0216m/z	-0.39261483614424536	0.6951399166426391	inf	0.0	0.010221216605378407
13004781	-0.14402935427616134	0.30351559530677685	1.85_130.0478m/z	1148534296188180	0.25250612126320565	1.14873e+16	2196521372263470	2523218388618250
13004982	0.028505191061100613	0.8394370265347983	1.85_129.0425n	4500441551177530	1.31916e+10	1.0182e+16	1.11723e+16	1137560005080350
13004987	0.11869771214127325	0.3972597185737502	4.57_146.0691n	-2.52521e+16	0.012561203052937812	0.9884438605122429	8706757991579690	8606141481742850
13006012	0.0557201895989265	0.6918952169188635	3.76_130.0601m/z	-0.4829169143013641	0.6298317448470085	1.03826e+16	2098009530916220	2.17828e+16
13006105	0.16345126529236473	0.2422209508012866	0.88_130.0611m/z	-2.16217e+16	0.032129369192903295	0.9609975749201216	5450516909320170	5237933531917800
13006108	-0.10313476482927206	0.4624054427341812	10.76_130.0611m/z	0.7902590231004616	0.43057616325540937	0.9993828613408196	4723957198281990	4721041861670610
130.06108*	-0.1737728054785624	0.21334791007809836	10.11_130.0611m/z	1.07985e+16	0.2818775252636465	1086243071184430	2.73708e+16	297313945479437
13006109	-0.013990525174260127	0.92079791918633	11.29_130.0611m/z	0.5704538921486582	0.5691906195851977	1.01078e+16	556847283264396	5628497153085230
13006508	-0.15604524105507964	0.2645122425900916	0.82_130.0651m/z	-0.9220304987153308	0.3579364448062097	0.9602999987051932	3.10493e+16	2981662292449250
1300651	0.1373651852124042	0.32666804243661984	4.41_130.0651m/z	-1.27774e+16	0.20323799846357332	0.9953279344053554	8663431058887490	8622954940705690
13006511	-0.04015724228692532	0.7752663458677613	3.77_130.0651m/z	-1975792666022400	0.04994215577456528	0.9867786988869596	8489987611966350	8377738929302560
130.06511*	0.05737324876937223	0.6832294741241836	6.31_147.0684n	-3.41826e+16	0.0008041043464788491	0.9498217423163132	7.14184e+16	6.78347e+16
130.06511**	0.15147666593572134	0.2789266823204903	7.32_130.0651m/z	-3.99433e+16	9.97052e+10	0.9607155592904923	5677057924949730	5454037879492600
130.06511***	0.16236266535085167	0.24541449662393836	6.90_130.0651m/z	0.5245366262257443	0.6006499127402047	0.9980143393177296	6531493644447630	6518524314321350
130.06511****	0.15441991762944174	0.2695821251082445	8.20_130.0651m/z	-3.08504e+16	0.002408260466510971	0.9586185508333376	5782979878513200	5543671790638670
1300681	0.2849760415563082	0.03861293810327723	1.88_130.0681m/z	-2.51871e+16	0.01278621634228855	0.7664079269554557	2065588374453410	1.58308e+16
13006822	0.0576957969001909	0.6815432668733573	3.80_130.0682m/z	-0.10162434383323356	0.919185358586766	1.00857e+16	4027385865975360	4061910266055330
13006823	0.06342102622222243	0.6518763549672149	3.60_130.0682m/z	-1.58518e+16	0.11495044233161368	0.9985251009969422	6859250788859000	6849134086708790
13006824	0.07350065531030607	0.6009451731606694	2.94_130.0682m/z	-0.7763050110306469	0.4387443244102196	1.03677e+16	1.99633e+16	2069734034091120
13006833	0.09636125408207984	0.49246563599285403	1.33_130.0683m/z	0.3065359502135643	0.7596053631905545	0.9276733307743866	2422811724266690	2.24758e+16
13007097	0.142163088658332	0.3098899106410941	1.35_130.0710m/z	0.9618567246527718	0.33761011095021143	0.9978256849331734	2212111533330830	2.2073e+16
13007368	0.2255820989913125	0.10435173593265012	1.23_130.0737m/z	-0.6210947002847965	0.5354437723540981	0.9944845508878812	608104214690708	6047502468397160
13008419	-0.2291359549628072	0.09886171648283333	0.97_130.0842m/z	-0.9050397028745091	0.3668399700867576	1340617830184290	0.459980255650803	0.6166577322581974
13008621	-0.26219131183923233	0.057881612956457225	0.96_129.0789n	-0.4180756123477857	0.6764667588884525	1.01443e+16	9225766699672580	9358935366246510
13008622	0.1786513459571949	0.20057549038791692	1.33_147.0895n	-0.32637248526563656	0.7445799904482874	1.00335e+16	1.05914e+16	1.06269e+16
13008624	0.16651547253514218	0.2333844347445655	4.23_130.0862m/z	-2723214565488670	0.007201822691610156	0.9794185570334688	6020905084191280	5896986169594100
13008625	-0.06192924111718605	0.6595574323146256	4.94_130.0862m/z	-0.6832804055559583	0.4954432258164666	0.9967514745362976	7206802874016930	7183391391368800
13009743	0.1252696303067038	0.3714513278114848	0.81_130.0974m/z	-1.20367e+16	0.2305385961545133	0.959274385391375	6510227510374500	6245094493772520
13010553	-0.06348820565283561	0.651531287893094	1.03_130.1055m/z	0.43752583777930604	0.6623351715629896	0.6862047079061995	0.9532765529719988	0.6541428585859792
13012261	0.12010886021360495	0.3916314147340956	4.27_130.1226m/z	0.06643369454100159	0.9471176091362092	1.00232e+16	4516150294547900	4526640715242470
13012262	0.4557201903304388	0.0006055689553783411	3.99_130.1226m/z	-1.04774e+16	0.2963767957600477	0.9846027025089206	4478281757284880	44093283208191
13012263	0.2079225888289899	0.13517924463108785	5.78_130.1226m/z	-0.9349085766100252	0.3512803361671252	0.980788532749564	5824257719069150	5712365182641150
13015697	0.03987581649882602	0.7768006383037922	4.34_130.1570m/z	0.1204044577104203	0.9043176942681006	0.9520181730514792	3.08167e+16	2933804016346940
13015899	0.17119242043201302	0.2203291134627401	4.34_130.1590m/z	-132557254084695	0.18691925456169767	0.999785656920994	1.18194e+16	1.18169e+16
13052161	0.16159661354015736	0.24767890811176965	13.00_130.5216m/z	-0.04097402845483051	0.9673689941837642	1.00874e+16	7.29457e+16	7358302339988370
130.52161*	-0.08499143247072148	0.5451196991342475	0.53_130.5216m/z	1.16764e+16	0.24473484120804265	1.03645e+16	6822350748022620	7.07104e+16
130.52161**	-0.0474548937466979	0.7357934864665845	7.53_130.5216m/z	0.988985271650798	0.32420182197950786	1009371904531970	5270310228904680	5319703073223860
130.52161***	0.1399052517426013	0.317715461675424	5.30_130.5216m/z	-0.02612121573616671	0.9791940396992074	1.00134e+16	5295753177339250	5302841660368710
130.52161****	0.2284043951359759	0.09997314553284918	5.80_130.5216m/z	-1.06747e+16	0.28740994523993546	0.9948578411396468	4676695659701540	4.65265e+16
13052162	0.04797903445927825	0.732982947260794	6.53_130.5216m/z	-1589421791423600	0.1139898022830152	0.9895407910240194	4841608908838930	4790969509481420
13052564	-0.000241911098114008	0.9986283226205356	0.69_130.5256m/z	0.7670791397247279	0.4441938242018223	1.03364e+16	4921236848032370	5086778676038810
13052566	0.09619998001667053	0.4931935273504908	1.25_130.5257m/z	0.4799835885824521	0.6319113730367127	1.02706e+16	5.44688e+16	5594274230715150
13053327	0.05297853048696776	0.706353873816175	12.94_130.5333m/z	-0.7726537282193109	0.4408963974507841	0.9858788859294909	5412655425609790	5336222700920390
13054316	-0.13044163877326478	0.3518684409382233	4.97_130.5432m/z	0.21487517286159727	0.8301452860248645	0.10726565060600146	0.44138906721307625	0.04734588546498674
13054385	-0.10450559438525144	0.4564451233477746	4.31_130.5438m/z	0.5576507238069901	0.5778822446395793	0.9128480542465032	3339891595405850	3.04881e+16
13056207	0.15982259882065464	0.2529771548264564	5.07_130.5621m/z	-0.1627820899381679	0.870900683304169	0.99014696131867	4.56606e+16	452107124941071
13056208	-0.060518093044854324	0.6668555265878017	4.89_130.5621m/z	-2.49161e+16	0.013762526334774391	0.8970505353038766	4714515070293960	4229158267505390
13056583	-0.13506702978032112	0.3349036057548008	4.51_130.5658m/z	-0.4136098705679187	0.6797278834441361	1.2017e+16	2335826372264310	2.80697e+16
13093286	0.055962100697040516	0.6906245795357517	0.53_130.9329m/z	0.2369746554132444	0.8129873561276153	1.11337e+16	3986369104265400	4438300092710430
1309491	-0.058945670907113286	0.6750238443990555	0.57_130.9491m/z	-2.06845e+16	0.040247879779530565	0.920833712891903	2.8464e+16	2621060876206710
13095498	-0.057857070965600235	0.6807007410580569	0.55_130.9550m/z	-0.7044292100513713	0.4822157962630139	0.9969876077455824	4604522432377450	459065180466687
13096522	0.19965729297676127	0.15175946685176014	0.70_130.9652m/z	-2306931114792380	0.022373968520752182	0.9934156638368424	953608524150398	9473296450593390
13096636	0.17663542013957814	0.20578606487238915	0.55_130.9664m/z	-1.80977e+16	0.07225678995053464	0.9985560242243168	9081349697439730	9068236448466120
13097909	-0.20010079665663694	0.15083333019947995	1.09_130.9796n	0.1966653928597412	0.8443453728909247	1.00085e+16	1.85035e+16	1851935257242690
13098178	0.007862110688705258	0.9554429580046668	1.05_130.9818m/z	-1.05376e+16	0.2936205574747281	1.00525e+16	9086523086106880	9134240025355710
13101123	-0.1146658605060398	0.41359918780466587	0.67_131.0112m/z	-2.62672e+16	0.009480933786028174	0.9484556829862136	5306684006891060	5033154604147870
13101768	0.07301683311407807	0.6033496681134167	2.01_131.0177m/z	0.6693494352508209	0.5042620275186229	1.01462e+16	282031040287986	2861533706656950
13102314	0.011369821611358376	0.9355991319705264	13.00_131.0231m/z	-0.3320653588870892	0.7402856454643789	0.9930983214407711	6293568392039070	62501322060067
1310248	-0.22039833570631126	0.11277712858257465	1.85_148.0281n	1.87075e+16	0.06325336467881816	inf	0.0	0.016084147719426692
13103384	0.0726942849832594	0.6049549928119915	1.52_131.0338m/z	1.79307e+16	0.07489875562131455	1.01942e+16	6635296817586990	6764165619050960
13103385	0.06370325583668877	0.6504271699875199	7.45_131.0339m/z	0.45568791332816294	0.6492480754559301	1.03282e+16	3.64878e+16	3768522591647190
13103386	0.3568591882345141	0.008715735683045468	1.96_131.0339m/z	-1.705e+16	0.09018577127294457	0.9885408704157927	5875341657625360	5808015356219140
13104508	0.13184154847213433	0.3466790952632943	1.42_131.0451m/z	-2285129167097270	0.02365254914522024	0.9587258739077892	4.86713e+16	4.66625e+16
131.04508*	-0.212156033045985	0.12723173289078954	1.04_131.0451m/z	0.236497662910272	0.8133567672921714	1.0288e+16	2475451926737230	2.54675e+16
13104911	0.01979639152899632	0.8881092757539791	5.69_131.0491m/z	0.5534272602294914	0.580763175854808	1.04745e+16	5440647753755730	5698828679404630
131.04911*	-0.08329805478392342	0.5531872968975964	6.04_131.0491m/z	0.5682011434823606	0.5707153543419801	1.08241e+16	0.7806189421415941	0.8449477635606314
13104913	0.10446527586889913	0.4566198265166177	3.76_131.0491m/z	-0.7665840812485315	0.4444873419756541	1.00005e+16	8206401240008010	8206780970364340
13105226	0.1080536238242569	0.4412147885459784	3.55_131.0523m/z	0.4848018173193501	0.6284969730500711	1.01633e+16	2822469173962760	2868569064333150
13105317	0.02963410951896598	0.8331670975456444	1.85_147.0724n	4502393479368340	1.30848e+10	1.02445e+16	830124522375695	8504229677179080
13105597	0.009636902483763315	0.9453985015624182	0.82_130.0487n	0.6200324576683686	0.5361410604181236	1040535678602360	5017326900338690	5220707651013800
131.05597*	-0.10434432031984213	0.4571441547396645	1.85_131.0560m/z	1532557533067790	0.12741038192621718	1.02843e+16	2126790443475560	2.18726e+16
13105881	0.17978026441506026	0.19769871872886768	2.90_131.0588m/z	0.2666401965004223	0.7900983321404433	1.00177e+16	2.72874e+16	2733561883753060
1310603	-0.2511398163394005	0.06968978928765122	5.22_131.0603m/z	-0.1313872789329451	0.8956382440903821	0.6614660257148416	0.3076090856238227	0.20347295934136644
13106848	0.07156536652539404	0.6105881987773087	6.08_131.0685m/z	1.13504e+16	0.25810033224664314	1.00388e+16	2.22215e+16	2230775767949880
1310685	0.050212949268814686	0.7210435952124192	3.71_131.0685m/z	-0.028050169370530214	0.97765798926654	0.8942446951571124	2.02401e+16	180996167586249
13106855	0.3249672417998174	0.017586132246039634	5.55_131.0685m/z	-1240417317118830	0.21668344718961804	0.9419305396715676	3.80293e+16	3582098019455040
1310702	0.12095554905700398	0.3882770909285127	4.00_131.0702m/z	-260577424447525	0.010054319108165307	0.9861530085863528	648456483402689	6394773120448880
13107022	0.28597923648710977	0.03790425284157485	1.98_131.0702m/z	-3908414170900530	0.00013816350340693992	0.9831221835896448	4985539032966880	4901394020461810
13107023	-0.010966636447835028	0.9378782853923012	8.79_131.0702m/z	1238997586177840	0.2172073207139415	1.0091e+16	4640996414584310	4683226091419610
13108145	0.048750134580050265	0.7288544817613294	1.11_131.0814m/z	1.53245e+16	0.12743608740307916	inf	0.0	0.077368064933935
13108147	0.08660417312481486	0.5374893522341443	1.92_131.0815m/z	-1.23726e+16	0.21784880272660856	0.9713918549535988	6081959223602880	5907965651967750
131.08147*	0.02350569503341111	0.8673176778966757	1.52_131.0815m/z	0.23473859777719905	0.8147194530138291	0.9895219568445744	5286176191668990	5230787409405500
1310855	0.04890636033538194	0.7280189742872587	5.52_131.0855m/z	-0.5187822005329661	0.6046477644963695	0.9994148701234452	5819027160773410	5815622274129160
13108551	-0.1999395225912276	0.15116962238578427	7.75_131.0855m/z	0.8170614334199696	0.41513937442591203	0.9997199294043884	6353632782850250	6351853317132460
13108867	0.11160165326326237	0.4262711959139889	4.78_131.0887m/z	-1.19522e+16	0.23381545916658705	0.9985683876405476	6338414862519570	6.32934e+16
13108957	0.1726035685043447	0.2164918278496541	3.41_131.0896m/z	-1.98593e+16	0.04879342378627482	0.8171153581902295	2.67601e+16	2186612899931480
13109237	-0.09087793585816234	0.517524161106883	1.32_131.0924m/z	0.7031657457711078	0.4830005426183166	1.00539e+16	3392279492793300	3.41056e+16
1310924	0.04977879555877317	0.7233589114611241	1.24_131.0924m/z	-15017990262052	0.13517047018085634	0.4358436234820371	1.33252e+16	0.5807711053175951
13110663	0.03358532412149478	0.8113057433211199	4.79_131.1066m/z	-3.03601e+16	0.0028101960472336346	0.9437021194228494	5014807622894080	4732484582223000
13111785	0.2773107554713578	0.04439624902933143	0.97_131.1179m/z	-0.03329564068474093	0.9734813930545204	1012351702457690	5850965891199390	5923235280977580
13115603	0.04822094555739225	0.7316869433282405	11.11_131.1560m/z	0.9096039495620956	0.36443462440936136	1.08587e+16	2.49783e+16	2.71232e+16
13115604	0.0385041831164796	0.7842905808582901	10.76_131.1560m/z	0.3359515921108391	0.7373587931141896	1.01576e+16	4477413516162480	4.54797e+16
131.15604*	0.2438463868989201	0.07848150492997151	11.73_131.1560m/z	1.66088e+16	0.0987458894037972	1095136165033970	2.78032e+16	3.04482e+16
13115605	0.21042657867277356	0.13043473270253966	4.44_131.1561m/z	1.22542e+16	0.2222632971221156	1177490714996320	1.44725e+16	1.70412e+16
13116235	0.02773913925040625	0.8436972837891237	4.34_131.1624m/z	-0.30930217069780264	0.757504409721484	1.00048e+16	1.08833e+16	1088858924506780
13152077	-0.058865033874408626	0.6754437453657188	12.40_131.5208m/z	-0.2900636208090161	0.7721527686007679	0.997343468351114	6915628362496560	6897256776879650
13153346	-0.06402580396750744	0.6487725278139599	12.99_131.5335m/z	-1.0151e+16	0.311630258491873	0.996930690958172	8307535157260300	8282036764486820
13192973	-0.09116016547262867	0.5162189425041498	0.89_130.9225n	-0.322926475852431	0.7471833531953479	0.9970177694963528	8205637590743490	8181166488018500
13192975	-0.031408124238468706	0.8233352632675303	0.55_130.9225n	-0.3677888895074933	0.7135291813720304	1.04494e+16	7418634748517480	7.752e+16
13195034	-0.18643281961319552	0.18134006037929773	0.97_131.9503m/z	-1586032058089220	0.11475699299772557	0.9959537446211536	6148339767709450	612346201485338
13196849	0.06692873714487554	0.6339571793173704	0.70_131.9685m/z	-2.12052e+16	0.03554399909535464	0.9557276931767192	4982312215462650	4761733760370310
13196977	0.12486644514318045	0.3730049702918925	0.56_131.9698m/z	-0.7803333978724489	0.4363770714835381	0.9985705979069338	4892710430018470	4885716779489030
13197421	0.08680576570657653	0.5365392327335043	0.55_131.9748n	0.062007835029350276	0.9506359672329548	1.00588e+16	9329549367971840	9384433812401050
13202547	0.07458925525181914	0.5955504796355442	1.24_132.0255m/z	0.8681102426071233	0.3866674807307233	1035808345481090	6.24197e+16	6.46549e+16
13203197	0.05946981161969363	0.6722968849804649	12.73_132.0320m/z	-0.14870908298947758	0.8819752525052048	1.00131e+16	5.68857e+16	5.69604e+16
132.03197*	0.0763229514549695	0.5870034948316774	11.01_132.0320m/z	0.43358017122286696	0.6651923089896336	0.9950001063301048	2.37313e+16	2.36126e+16
13204434	0.26069952673419594	0.05937426581409633	4.34_132.0443m/z	-3.1062e+16	0.0022517949967939357	0.9641619326649572	7420744206513850	7154799075964680
132.04434*	-0.15885495442819858	0.2558991609080482	5.28_132.0443m/z	-2.17163e+16	0.031394404546342666	0.7776014147561869	0.7674516113741159	0.5967714587614279
13204435	0.11922185285385363	0.3951637036407015	4.41_132.0443m/z	-5103798088429670	9.56776e+07	0.954557681560922	5.23381e+16	4995977990699020
132.04435*	0.038867049763650616	0.782307193653743	5.35_132.0443m/z	-1421352057849130	0.1572104163944529	0.4037066874452201	1537114532280410	0.6205434160508367
13204436	0.26989214846252824	0.050650497621804416	4.83_132.0449n	-2.66085e+16	0.008609663868394136	0.8972849158448508	6851652169763740	6147884140544650
132.04436*	0.17937707925153693	0.1987227552062415	2.16_109.0551n	-3.2247e+16	0.001536156807212892	0.9763295771669404	6005331651690330	5.86318e+16
132.04436**	0.038749542844101384	0.7829493232477928	5.43_132.0444m/z	-5212137913307320	5.83804e+08	0.6925843898696078	2.792e+16	1.9337e+16
13204769	-0.04088297558126735	0.7713136927539905	2.73_132.0477m/z	0.2721423092360845	0.7858724537679994	1.02897e+16	3.00536e+16	3.09243e+16
13205266	0.18873097504527855	0.17592208911694548	2.39_132.0527m/z	1159957541165410	0.24783829785566214	1.03389e+16	4292025296161100	4437481524444140
13205651	-0.04753553077940257	0.7353608713742867	1.85_132.0565m/z	1.6528e+16	0.100382474310073	1.06646e+16	4131931422709190	4.40653e+16
13206109	-0.20308846077309067	0.14470303579494592	0.93_132.0611m/z	0.5978135325141191	0.5508312074308161	0.8933831676260299	3700862838137860	3.30629e+16
1320654	0.07958875127950864	0.571054985840918	0.83_131.0581n	-0.2968939174190006	0.7669424374211755	1.00129e+16	89635297598219	8975060550313750
13207459	-0.13980033012952348	0.318082143480199	0.93_132.0746m/z	-0.653304189170381	0.5145219193887619	0.9796588649569096	3.45575e+16	3385455238695810
13207667	-0.110835601452568	0.4294731751412456	0.93_131.0694n	0.2455273047843034	0.806370884691515	0.990645940031924	11959304945558	1184743688992070
13207669	-0.11228706804125203	0.4234177549230636	3.49_132.0767m/z	-1.61784e+16	0.1077171061461554	0.96960288842952	3964403794261980	3843897369817370
132.07669*	-0.04910795291714362	0.7269413048886522	1.98_132.0767m/z	-0.3623590715179964	0.7175741451334645	1.01356e+16	2.65536e+16	2691377132493390
1320767	-0.09640157259843217	0.4922837505174488	2.20_132.0767m/z	-0.311213547382092	0.7560537678056529	0.9950458018242844	3.57607e+16	3558353364446210
13208073	0.13986493322624893	0.3178563356868161	4.40_131.0735n	-1.85554e+16	0.06540583342224626	0.9887592678407404	8078061999884380	7987258668577790
132.08073*	0.08926519520406895	0.5250142084903358	4.13_132.0807m/z	-0.959063376787902	0.33901087181951417	0.997055740966962	4700635385339750	4686795497145450
132.08073**	-0.18840842691445991	0.17667535784397173	8.50_132.0807m/z	-0.21335909458645	0.8313254652279812	0.933849214854288	1.73148e+16	1.61694e+16
13208074	0.2594093342109212	0.0606900576352194	4.99_132.0807m/z	-3.01583e+16	0.0029928311489643127	0.7779368542142375	3.82978e+16	2979323330059420
132.08074*	0.2086080036069796	0.13386786346290333	5.55_132.0807m/z	-2892459454028610	0.0043689715992156685	0.8730888060036962	3189220351168020	2784472588483970
132086	-0.04999496027689498	0.7222058091270762	2.40_132.0860m/z	-0.6061759235042097	0.5452789767634891	1.00628e+16	670243255525966	6.74449e+16
13208884	-0.2459026312328891	0.07591864804058232	4.88_132.0888m/z	-1.25397e+16	0.21173046142870927	0.9574195126262264	2.15044e+16	2058874957641580
13208885	-0.13159963737402036	0.3475724435352892	8.01_132.0888m/z	1.03949e+16	0.3001837943769525	2.66712e+16	0.5272866284288708	1.40634e+16
13209044	0.09987786691350432	0.476733759746793	0.73_132.0904m/z	-0.4679227763491058	0.6404928707428976	inf	0.0	0.10609536276027312
13209288	0.12236669712933572	0.3827244332863717	1.33_132.0929m/z	-0.054519375387344034	0.95659113090036	1.00388e+16	3.53363e+16	3547342762059180
13209975	0.14466283667217678	0.3013712664363593	2.39_132.1003n	-0.8997848982865609	0.36962158178376014	0.9799467722139846	5801383985971670	5.68505e+16
13209977	0.15284749549170076	0.2745481637702852	2.09_132.0998m/z	-1.21135e+16	0.2275935387596328	0.9758514065418591	4297353148613510	4193578114481580
13210182	0.07902429205057594	0.5737971631911254	2.39_132.1018m/z	-0.5659350562743041	0.5722510959049901	1.00187e+16	1.30443e+16	1.30687e+16
13210183	0.044068138373101785	0.7540352080368552	2.09_132.1018m/z	-0.8896872333773199	0.3750037829302453	0.9944331745879516	1236560208126720	1.22968e+16
13210511	-0.06930752960966327	0.6219217202302041	2.38_132.1051m/z	0.5521954081547269	0.5816047304358742	0.9608894643245971	1.02253e+16	0.9825407942711424
132.10511*	0.05037553853582127	0.7201771529934395	2.08_132.1051m/z	0.2363738617084246	0.813452653110698	inf	0.0	0.015869662728097214
13211736	0.031166213140354695	0.8246744201768645	2.40_132.1174m/z	-1.12693e+16	0.2615010194028993	1.00103e+16	6.54712e+16	6553892791314230
1321174	0.026086080079960532	0.8529054483144105	2.09_132.1174m/z	-1327715090673790	0.18621179261731025	1.00108e+16	5051818851227370	5057251010014970
13212118	0.2119007083833912	0.12770082887988235	1.05_132.1212m/z	-0.7470484105425506	0.4561588200257888	0.8650420036222395	1.3813e+16	1194882648738620
13216568	0.02019957669251967	0.8858454410498385	4.34_132.1657m/z	-0.7381298282734581	0.461544503271815	0.9961817090160312	5773551117306890	5751506019130190
13248875	0.03471424257936015	0.8050850046937598	0.70_132.4887m/z	-2574971191096790	0.010954202384139284	0.9929571644023126	7823918157456870	7768815588144140
13252309	0.06268024972596595	0.6556861355116183	1.26_132.5231m/z	3048678258074150	0.0027007750900271354	1.47877e+16	1.21016e+16	1.78955e+16
13253117	-0.06914625554425395	0.6227346378967551	13.00_132.5312m/z	-0.7945079739765891	0.4281067913639585	0.9928744219700504	7626399670492740	7572057164553060
13254055	-0.14107448871681902	0.3136473914465979	4.30_132.5406m/z	-0.21426869639518925	0.8306173465921247	1.00433e+16	3427220592560010	3442076374805380
13290266	-0.1118838828777287	0.425094933987664	0.72_132.9027m/z	0.7515094495239746	0.4534783673484018	0.9130500273928562	4.43295e+16	4047502811340120
13293002	-0.24646709046182186	0.0752268344740997	9.03_132.9300m/z	1.35295e+16	0.17803044815982794	1018672350301230	5730347224410630	5837346275132530
13293308	-0.09430500974811078	0.5017879611744951	8.58_132.9331m/z	0.8954237523570278	0.37194016207657976	1.00238e+16	4029806089676060	4039377235498760
132.93308*	-0.15386325578429005	0.271333296244815	8.47_132.9331m/z	1.40103e+16	0.1631898978976715	0.8439192575057368	2566876492760820	2.16624e+16
1329582	0.2416080321452292	0.08134848315578322	1.06_132.9582m/z	-0.7456564906898494	0.4569970044964462	0.9940880578291268	2303824389853020	2290204313288370
13297865	0.028142324413929595	0.8414544819680875	1.26_132.9787m/z	2.2355e+16	0.02680427760528185	1.06387e+16	2.88015e+16	3.0641e+16
13299458	-0.07685328926381957	0.5844000265134301	1.10_132.9946m/z	2265862681815620	0.024835255942975528	1.22136e+16	0.2856092759393533	0.3488326765936189
13299813	0.2517084975876253	0.06903867931249384	0.70_150.0014n	-0.7624224882386559	0.4469591438441841	0.9962332464158284	8958140086992650	8924396980712460
13299816	0.12285051932556372	0.3808315898958585	3.08_132.9982m/z	0.7804824039752738	0.4362896518618989	1.0005e+16	4999596213952640	5002094238598940
13301709	0.008925191836699235	0.949425512807121	4.15_133.0171m/z	1.92102e+16	0.05655277600347819	2.56938e+16	0.25883931020591233	0.6650553041008762
13302963	0.1831613567760903	0.18925837119374206	1.39_133.0296m/z	-0.6134065096270406	0.5405009243874468	0.6614869543702437	1.7739e+16	1.17341e+16
13303331	0.1863925010968432	0.18143617286631428	1.93_133.0333m/z	3765655252790780	0.00023488780836624902	1.53793e+16	3.18823e+16	4903271715824000
13304936	0.2293317210120796	0.09856592618357944	2.16_133.0494m/z	0.33507120681856195	0.7380215057011811	10403611147071	4.31145e+16	4485463422145820
13304946	0.2263078322856545	0.10321195040760996	1.35_133.0495m/z	-0.8873789183233589	0.3762409818109149	1.0009e+16	4580406101922230	4584541630068850
13304947	0.04386654579134011	0.7551253476225329	0.92_133.0495m/z	-3.47979e+16	0.0006507636207389463	0.9223185305510512	5881852660744910	5.42494e+16
133.04947*	0.12696300799350188	0.36496866851426135	1.19_133.0495m/z	-3.10161e+16	0.002284936086113905	0.948067252329932	4.8697e+16	4616806249019030
13305219	0.2130430404057364	0.1256121820851391	4.69_132.0449n	-1.45392e+16	0.14797770930076434	0.9477342933712176	4.64192e+16	4399303503937990
13305524	-0.06753351489016056	0.6308882358715259	4.55_133.0552m/z	-0.4656855534421601	0.6420900934039817	0.9977174618374264	6059651302783550	6045819917433060
13306071	-0.19824614490442952	0.15473421494280856	1.29_133.0607m/z	-1.03138e+16	0.30396072549858066	0.9869721484239528	6340026501589730	625742957733882
13306073	0.035810061854828525	0.7990580789371118	1.97_133.0607m/z	-1.39867e+16	0.16389728589451208	0.6396236108928033	1.05406e+16	0.6742047765166178
1330616	0.16558814665903848	0.2360349085680243	3.73_133.0616m/z	-0.3278037428793217	0.7434995791991335	0.9137383186578144	6015747982755360	5496819447232020
13306338	-0.15846948458952287	0.2570694796066753	0.53_132.0561n	-0.07369267220759658	0.9413493358537108	0.9378830850391304	4.60131e+16	4315487449320790
13306475	-0.20421328532457508	0.14244369651508215	6.43_133.0647m/z	0.6149818461714366	0.5394627354628176	1.0098e+16	5695855522786750	5751703116527670
13306884	0.20663239630571514	0.13767381527643566	2.16_132.0616n	-2.00848e+16	0.04631814056642507	0.922098095714378	2.09245e+16	1.92944e+16
1330697	-0.252635823463729	0.06798734816265982	2.51_133.0697m/z	-1.99922e+16	0.04732090499212213	0.9753958669711504	2.92109e+16	2849223133454010
13307194	0.152283036262768	0.2763455351022416	1.03_132.0647n	-0.773164102580028	0.44059521510005095	1.00061e+16	907733791730376	9082905867885620
1330726	0.20590666301137314	0.13909205786768888	2.04_133.0726m/z	-0.9923178639061384	0.3225791686225794	0.9866382380571508	5843866522817130	5765782169513460
13307598	0.17542586464900814	0.20895782609214247	3.84_133.0760m/z	-0.7492298141047471	0.4548469828754938	0.9921395704033455	4897516920321630	4859020333371020
133.07598*	0.06305815957505143	0.6537414681569154	6.95_133.0760m/z	0.2258822389504005	0.8215886813731048	0.924729044159022	2025549209290070	1.87308e+16
13308002	-0.10333635741103374	0.4615262919640256	0.93_133.0800m/z	-0.00152346261002545	0.998786399596042	0.9935261666363496	89162483746754	8858526068468830
13308584	0.07926620314868994	0.5726212032272553	3.76_133.0858m/z	-3.24564e+16	0.0014341839680237724	0.9747002518454724	6350577276411880	6189909270682790
13308585	0.021182960829914645	0.8803276862953899	1.22_133.0858m/z	-1.50968e+16	0.13314730182955348	2.49176e+16	0.06912707315206833	0.17224780218570204
13308586	0.07092027026375668	0.6138172749514827	3.99_133.0859m/z	-2.36501e+16	0.019259713718936616	0.9788839722463254	5384041051308930	5270351491042560
13308855	-0.14860238758522734	0.2882561638108361	4.13_133.0885m/z	4224256773519430	4.06264e+10	0.5339918708959529	0.22652045210574684	0.12096008001614487
13309708	-0.131438363308611	0.3481687975505011	1.00_110.1079n	0.24990274081774216	0.8029913448751593	1.03513e+16	3594505808696380	3720782169594670
13309709	-0.017498236096913245	0.9010295192342884	0.72_132.0898n	2.15181e+16	0.03295063291406232	1.01282e+16	8939659975608860	9054246002621380
13310113	-0.05503477482093681	0.6954999190443534	4.92_133.1011m/z	-0.07602568480355731	0.9394960755756624	0.9945011533744152	6728383330190150	6691384982219290
13310114	-0.3119443610180133	0.022971723232654995	7.56_133.1011m/z	2306580206452140	0.022394057457868044	1.01483e+16	6.21942e+16	6.31167e+16
13310518	0.07555689964427516	0.5907732728798507	2.39_133.1052m/z	-0.5582229073383731	0.5774924665853645	1.00295e+16	1.03913e+16	1.04219e+16
13310519	0.03487551664476948	0.8041972945857172	2.09_133.1052m/z	-0.9152271341134278	0.3614849389726834	0.9933751859204086	970539106326533	9641094651901460
1331052	0.2620703562901753	0.058001500436856826	1.63_133.1052m/z	-0.1948368492323414	0.8457741888188806	1057214015084710	3297936866671290	3.48663e+16
13310789	0.15812922113385658	0.2581055382874136	2.07_133.1079m/z	-1810617459462410	0.07212433248087265	0.984214121115594	4694282306358340	4.62018e+16
13352993	-0.03757685724037591	0.7893653892861839	12.98_133.5299m/z	-1.05587e+16	0.2926596703122949	1.00287e+16	8098243621545740	8121465745615850
1335568	-0.14369519227972075	0.30465068204793605	4.50_133.5568m/z	-0.9386221798733424	0.3493757424299805	0.9930625099903988	407300493880604	4044748507734010
13357431	0.09095857289086699	0.5171510724843739	2.02_133.5743m/z	-3.05378e+16	0.0026578639337052	0.7902777216294878	2.57333e+16	2.03364e+16
13392676	-0.11349662353182208	0.4184088222335034	0.89_133.9268m/z	-0.5865335277175054	0.5583648124932727	0.9951377378445508	58834124824572	5854805788598850
13392678	-0.015441991762944175	0.912611443000468	0.55_133.9268m/z	-0.3106272084962958	0.7564986784613129	1.06567e+16	5.37896e+16	5732204437934930
13393011	-0.07309747014678275	0.6029486275465342	8.67_133.9301m/z	1970944696652410	0.050499626121360566	1.00798e+16	7212444106492330	7.27e+16
13393013	0.056244330311506864	0.689143237776045	0.89_133.9301m/z	0.3173966407683085	0.7513670682876634	1.00528e+16	5.06817e+16	5094942497523360
13396599	0.07277492201596407	0.604553487465214	1.24_132.9575n	1.86446e+16	0.06413617599639371	1017917287421580	7707394957111240	7845490567829500
13397456	-0.0005644592289326853	0.9967994262462384	1.25_133.9746m/z	2.11113e+16	0.03635545564885863	1.02165e+16	5.42805e+16	5.54559e+16
13397457	0.04717266413223156	0.7373082787791065	13.00_133.9746m/z	0.2527785867381126	0.8007720921493033	1.00099e+16	499708714477074	5002014365033020
13397458	0.00060477774528502	0.9965708151554622	0.53_133.9746m/z	0.5714358435999135	0.5685266175213666	1.05146e+16	6.54705e+16	688396791306946
133.97458*	-0.014998488083068497	0.9151119512660788	9.30_133.9746m/z	0.06511035140353218	0.9481695011086129	1.0046e+16	7189841036678950	7222941384354660
133.97458**	-0.03999596822151598	0.77614548487727	9.05_133.9746m/z	0.7488647516850322	0.4550663719457509	1.01275e+16	6.18344e+16	6262293477079060
13397459	-0.08724926938645222	0.5344518598214353	8.56_133.9746m/z	0.5991861972982507	0.5499178998001995	100292085142485	8633896965109140	8659115295361680
133.97459*	0.07083963323105201	0.6142214226395861	4.06_133.9746m/z	0.023728154283606414	0.9810997727392284	1000561129818170	7837219689328720	7841617386988020
1339746	-0.2649329709511911	0.05521733672810555	5.42_133.9746m/z	0.7564099261861077	0.4505442446955789	1.00193e+16	9140159086047570	915781067456138
133.9746*	-0.18727950845659447	0.179330159896879	7.79_133.9746m/z	1.39643e+16	0.16457010746979475	1005038008321740	7.37512e+16	7412279865829770
133.9746**	-0.2275173877762245	0.10133367752277636	7.44_133.9746m/z	-0.059345716533137985	0.9527527035242168	1.00084e+16	5747580875397160	5.75241e+16
13397461	-0.09994960203743763	0.4764156508181584	5.02_133.9746m/z	0.6605252065947519	0.5098910300304089	1.00181e+16	783261580568504	7846804920646700
13401873	-0.14248563678915072	0.30878214602289744	0.80_111.0295n	-0.8181984532944072	0.4144918938776325	0.9905195906643164	8301983612851830	8223277409903860
13402695	-0.31895620054835383	0.019921177895163428	0.93_134.0269m/z	0.5299289153525891	0.5969146373441248	inf	0.0	0.07338592640208019
13403618	0.0599987903591624	0.6695489893619904	4.16_134.0362m/z	1.17717e+16	0.24092101337448146	0.9894268057965342	2.52404e+16	2497354632587100
13403785	0.15525304939942006	0.2669753084221136	1.39_134.0378m/z	1.33398e+16	0.184155481226792	inf	0.0	0.608847052431537
13404468	0.070476766583881	0.6160414929516028	1.18_134.0447m/z	1.1993e+16	0.2322303829691653	1.00462e+16	4643376507788670	4664830070729920
1340447	0.3167825829802935	0.02082780197511585	1.57_134.0447m/z	-1929812389113570	0.05544463078182876	0.9932023088496764	6535753406469090	6.49133e+16
13404472	-0.14083257761870496	0.3144863204580395	0.93_134.0447m/z	-2667939525133570	0.008437861684417996	0.9783035960689248	6280828800700990	6.14456e+16
134.04472*	0.12118961747895375	0.3873527878084235	2.07_134.0447m/z	-1048534798229720	0.2960140275212103	0.35121189875946474	1.80767e+16	0.6348767132501438
13405285	0.06303780286743213	0.6538461627563574	1.03_134.0528m/z	-3.00751e+16	0.0030713631503236144	inf	0.0	0.32152849578866405
13405996	-0.05479286372282281	0.6967737676128157	4.12_134.0600m/z	1.01566e+16	0.3113644490615365	1.062e+16	3.6813e+16	3909538365855150
134.05996*	0.16308839864519373	0.243282298920636	3.82_134.0600m/z	-1.73328e+16	0.08502118936152668	0.9871935984147095	419752692458462	4143771709123320
134.05996**	0.036528575815215215	0.7951125764534378	4.62_134.0600m/z	-3.14798e+16	0.0019701226106840094	0.9115603346331954	4.83188e+16	4404550065367070
13405997	0.2629573636499267	0.05712695798351663	4.83_134.0600m/z	-3.61347e+16	0.0004070417501078873	0.9318851753692732	6862386081121370	6.39496e+16
134.05997*	0.17119242043201302	0.2203291134627401	3.68_151.0633n	1.61909e+16	0.10744867303567804	1043166194247770	5251888249658710	5478592278011080
134.05997**	-0.18498135302451146	0.18482325292878304	0.58_134.0600m/z	-0.11771801635837027	0.90644252107575	1.01654e+16	2.79762e+16	2.84389e+16
13405999	-0.01890938416924496	0.8930928055309202	1.84_134.0600m/z	-0.5177055395266974	0.6053971046005239	1.00144e+16	5.1029e+16	5.11025e+16
13406335	0.12244733416204034	0.3824085715242159	3.93_134.0633m/z	-0.7611133837553732	0.4477383232375956	1027238528139110	3.96632e+16	4074360204675030
1340679	0.13849410367026954	0.3226696734989539	3.74_134.0679m/z	0.4788182235969629	0.6327383952312251	0.9999282027225574	8053940475926490	8053362224927630
1340712	-0.08109149122270796	0.5637842463816151	0.54_134.0712m/z	-0.6309867037823343	0.5289725953614346	0.8305825431997386	3.91479e+16	3.25155e+16
13407121	0.049591775113371636	0.7243570394829261	5.52_134.0712m/z	-1.07016e+16	0.28620160870385997	0.9941693330244019	4.22878e+16	4204126385366420
13407527	0.21255921820950835	0.1264936302876305	1.01_134.0753m/z	0.13078471056930654	0.8961141217656907	1.01754e+16	4.83229e+16	4.91705e+16
13408111	-0.04172966442466638	0.7667095405220814	1.28_134.0811m/z	-1.80418e+16	0.07313211659747601	0.9780881828659004	5118657698363250	5006498606904660
13408113	0.1437758293124254	0.3043765229709532	1.57_134.0811m/z	0.42047774978712027	0.6747151149606252	1.01611e+16	4656666048958530	4.73167e+16
13409951	-0.051928044298532414	0.7119215069474064	3.35_134.0995m/z	-0.9063316786094681	0.36615809053721504	2.17179e+16	0.08246045585111184	0.17908650752105304
13410044	-0.00794274772140993	0.954986431035134	0.72_134.1004m/z	1.38164e+16	0.16905750205766126	1.03557e+16	5607032888065440	580649291242649
1341085	0.04886604181902962	0.7282345708675193	2.09_134.1085m/z	-1.02715e+16	0.3059375921472869	0.993437696375318	5826839604376090	5788602113719850
13410851	0.06156637447001503	0.6614311186355479	2.39_134.1085m/z	-0.7851909594237795	0.4335324669356053	1.00517e+16	6601015313980390	6635160237188140
13411749	-0.11486745308780147	0.4127731623947876	12.50_134.1175m/z	1.12283e+16	0.2632356839477672	0.9971249077315174	1107748050416830	1104563172561650
134.11749*	0.2282028025542142	0.1002811094811288	1.71_134.1175m/z	-3.39563e+16	0.0008685534844286568	0.9797589873578024	8987940375411310	880601536064529
13455199	0.05686681784539172	0.685880072017345	4.06_134.5520m/z	-2.50695e+16	0.013201959484844272	inf	0.0	0.0033522205371386607
13495801	0.10918254228212226	0.4364287078344665	0.71_134.9580m/z	-0.5635829897620279	0.5738471995493089	1.00101e+16	3.76604e+16	3769837791444880
13496121	-0.14478671086681927	0.30095310102665235	1.20_134.9612m/z	-2140239930740500	0.033889844857710565	0.7576911526833591	1.52797e+16	1157727374947250
13496122	0.08841850636066992	0.5289679180638112	1.30_134.9612m/z	-0.8926093161092592	0.3734412652565088	0.9961332763640021	3.63233e+16	3618285876977150
13496124	0.07652454403673119	0.586013247692871	0.59_134.9612m/z	-1.07523e+16	0.2839327247946908	0.9472002733392316	3322265169767970	3.14685e+16
13496933	0.26192156728278304	0.058149250108324765	1.25_134.9693m/z	1.95647e+16	0.05219496738345596	1286342679215520	1.71417e+16	2205009261178410
13498677	-0.1326076002828287	0.3438595271687711	0.67_134.9868m/z	-2.91877e+16	0.0040342623071041505	0.9554684887529696	5940074990530570	5.67555e+16
13499144	0.07515371448075181	0.5927616968894479	0.70_134.9914m/z	-1.62965e+16	0.10519313227342653	0.9916220421569228	7597720441838300	7.53407e+16
13500277	0.021812317346613052	0.8767993149590186	1.26_135.0028m/z	0.3783576145088105	0.7056793304215505	1017261210895540	5691119841254260	5789355461065950
1350327	0.25078117171152164	0.07010292695206073	4.55_135.0327m/z	0.3558270815432183	0.7224507817835215	1.01528e+16	3.78653e+16	3.84437e+16
13503838	0.029891496169662926	0.8317390166338696	1.39_135.0384m/z	-0.6772854919867337	0.4992279979358779	0.6895893036326693	1.25685e+16	0.8667083067505508
13504393	0.03991533118881132	0.7765851588298665	3.66_135.0439m/z	-0.14150362231430227	0.8876546686227549	1.00034e+16	7.06916e+16	7071590340251230
13504394	0.027900413315815588	0.8428000144505912	8.39_135.0439m/z	-2663918494201760	0.008534851905059919	0.9912440292332764	5.75498e+16	5.70459e+16
13504395	0.1535732287860427	0.2722486646875745	3.81_135.0439m/z	0.09913044665286848	0.9211619671219264	100274642450674	638971116414732	6407260023479520
135.04395*	0.05753452283478156	0.6823861781984368	7.29_135.0439m/z	1.35281e+16	0.1780721954976964	1.01328e+16	5.76915e+16	5845770184193980
135.04395**	0.02257836915730741	0.8725077962419896	2.51_135.0439m/z	0.8896673116576965	0.3750144496006159	100629483693237	4842206788776350	4872687690904520
13504396	0.08390283252920844	0.5502995038729819	1.96_152.0472n	-1.54006e+16	0.12557170956425	0.995452728426813	5370514427202220	5346093239614020
13504397	0.21505896622335308	0.12198939810534445	4.27_135.0440m/z	-0.15713480196985954	0.8753418002588134	0.9992256950882722	5896527360934910	5891961650837200
135.04397*	0.4097974002051296	0.0023091759652668874	5.05_135.0440m/z	-0.7703048069623415	0.4422840788671028	0.9980455575040889	5045788145959840	5035926443182010
135.04397**	0.06354198177127944	0.6512551190882621	0.65_135.0440m/z	0.018376555263443502	0.9853619378422216	0.9966689555264144	4838575195563840	4.82246e+16
13504398	0.05088196763664635	0.7174806178834608	5.57_135.0440m/z	-0.056920681190748425	0.954681220689217	0.9985368218679238	8052309195128500	8040527232401470
135.04398*	-0.0016127406540933865	0.9908556740012628	4.96_135.0440m/z	-3.1467e+16	0.001978265824772153	0.9695195431268834	5432426368873810	5266843531220970
135.04398**	-0.15554883608730713	0.2660538704167172	7.79_135.0440m/z	0.8787222101214501	0.3809033754501132	1.00755e+16	508436661092324	5.12278e+16
13504399	0.029230924355442632	0.8354051974539248	7.43_135.0440m/z	-0.7099082928141494	0.4788208123961081	0.9997295887495921	5154426014770870	5153032199987080
13504733	0.039177336815276936	0.7806122884019043	1.23_135.0473m/z	-3504429476027990	0.0005974233532028647	0.7752375299231591	2.86731e+16	2.22285e+16
13504799	0.023013869968824777	0.8700696798632267	0.81_135.0480m/z	2.7723e+16	0.006244369722084793	inf	0.0	0.0741604124585652
13504808	0.03390416128000896	0.8095476487279684	1.57_135.0481m/z	-1.3643e+16	0.17443865451090798	inf	0.0	0.04708347927021403
13506198	0.08374155846379909	0.5510688772940968	2.36_134.0547n	0.2116416911569339	0.8326628283287192	1012450084306590	747877658065361	7571887979592950
13506202	0.09277290612672204	0.5087924538172279	2.18_134.0547n	-0.2406576297327888	0.8101364636514155	0.9990313162735298	5769657695404260	5764068721887420
13506332	-0.12403203000740605	0.3762327020127412	5.10_135.0633m/z	0.5976832317767722	0.5509179426534493	inf	0.0	0.050016874872883685
13506513	0.12321338597273472	0.3794156248118967	6.81_135.0651m/z	-0.8226206024702032	0.4119794221120393	1010382491586880	1526967324398310	1.54282e+16
13506514	-0.07450861821911446	0.5959493507015596	1.95_135.0651m/z	-2.1314e+16	0.03462295911036158	0.9815962143234972	4285481432956790	4206612351144020
135.06514*	0.04519705683096716	0.7479392669743472	2.50_135.0651m/z	0.43146048845030016	0.6667292472103912	0.9073325162879032	1.6987e+16	1.54129e+16
13506515	-0.030157928889895762	0.8302613121633856	1.07_135.0652m/z	-0.9212994218891206	0.3583166946228797	0.7806059040163299	1020825285302420	0.7968622446762241
13506518	0.0021368813666737376	0.9878839625138194	2.91_135.0652m/z	-0.4985317810167922	0.618811453370021	0.9972281874538664	3416797237904150	3407326516452530
13506779	0.1934469219792933	0.1651727217372743	3.29_135.0678m/z	-1.73456e+16	0.0847937616918032	0.9216647293128092	3593236445281900	3311759295697660
13507418	0.1599032358533593	0.2527346764750349	3.74_135.0742m/z	0.397592780164098	0.6914738929779491	1.00045e+16	9265890150621910	927003915538184
13507901	-0.04954610675314231	0.7246008406489277	0.53_93.0452n	-1.04746e+16	0.29650599897645624	0.8746458638638818	6739208555205170	5894420888526290
13508037	0.4373752653901264	0.0010571199386482358	6.03_135.0804m/z	0.5215321713526473	0.6027357351626457	1.0058e+16	7.32903e+16	7371567555363140
13508038	0.4265699030077008	0.001446996790274714	7.83_135.0804m/z	-1.70729e+16	0.08975785869375234	0.9887386707590068	7.03835e+16	6959084493582960
13508441	0.07716964029836854	0.5828495217938051	0.88_170.0983n	-0.7194948733814857	0.4729125483563494	1.01828e+16	4036953542678880	4110749434090420
13509159	0.16046769508229194	0.251041727723977	3.61_135.0916m/z	-2.21524e+16	0.02819239205853907	0.959934568425234	3.23644e+16	3.10677e+16
1350916	0.4270940437202812	0.001425464539545692	3.72_135.0916m/z	-0.2255388108556263	0.8218553354234643	0.9888745937490164	5407918378903720	5347753089966260
13509162	0.17732083491756787	0.20400387313579213	3.82_152.0949n	-2.67485e+16	0.008273393731799585	0.966420940117288	5481058624881440	5297009829095890
135.09162*	-0.13228505215201006	0.3450449776742499	4.79_135.0916m/z	-1.4965e+16	0.1365427573804288	0.9767970930856568	6608456146449990	6455120753636390
13510149	-0.06757383340651289	0.6306838583199657	3.93_134.0942n	-0.09632090589494373	0.9233893363892952	0.9977189812750727	9833049092763680	9810619723659960
13511672	-0.13712327411429018	0.32752888104316924	3.74_135.1167m/z	0.7892991785474633	0.4311351515554315	1.01326e+16	6520108720896450	6606559877955720
13511674	0.19268218964780734	0.16688243511042522	8.51_152.1200n	-1.1391e+16	0.256409517162169	0.9939870566212329	1.00318e+16	9971520090915720
135.11674*	0.05297853048696776	0.706353873816175	10.93_135.1167m/z	-4137885771083070	5.71605e+11	0.9733883639015396	7531686595500750	7331256092613630
13511675	-0.040842657064915015	0.7715331345625634	4.42_151.1360n	0.2938676322630657	0.7692496712170955	0.999085194822204	6298144086769620	6292382511948540
13511676	0.11273057172112773	0.4215772054062884	4.96_135.1168m/z	-0.1508675922475546	0.88027507211852	1009835717849080	8651358105435080	8736450422771550
13555427	0.14030843690612466	0.3163089056718044	5.62_135.5543m/z	-1.33519e+16	0.1837607591519405	0.9907610864340828	4.31228e+16	4272444095881600
13594532	0.0005644592289326853	0.9967994262462384	2.28_152.9486n	-0.5104070495915708	0.6104877800623036	0.9985892120145906	8422305857599410	8410423769686070
13594533	0.0926922690940174	0.5091624834406259	3.14_135.9453m/z	0.4542385022850779	0.6502885461161223	0.9985802155333532	9301298704771550	9288092865350880
13594534	0.1150287271532108	0.4121130254958724	1.68_152.9486n	1.8423e+16	0.0673298295771622	1.00082e+16	8655331553952780	8662417258169820
13598719	0.2944864434374524	0.03231538283440475	1.08_135.9872m/z	0.619175961806021	0.5367036259994022	1.08975e+16	1.83785e+16	2.0028e+16
13600802	0.2269126100309395	0.10226948503641403	0.70_136.0080m/z	-1.3954e+16	0.16487716833164667	0.9956079421052334	8707958410736870	8669712553251690
13602155	-0.13583308159101548	0.3321441179042009	6.61_136.0215m/z	-0.16452843139557735	0.8695281574037257	1.00089e+16	7665844876252570	7672684252107990
13603926	-0.06218368849115495	0.6582448102595231	1.37_136.0393m/z	-0.048771090577449466	0.9611641063513208	1.07399e+16	1.81807e+16	1.95259e+16
13603928	0.2351375873668157	0.0901013813019952	3.86_136.0393m/z	-6.25667e+16	3.62116e+07	0.8838553271832907	5043586775431020	4457801039575910
13604738	-0.3179187441055751	0.020349646774603047	6.24_136.0474m/z	-0.054598375658391006	0.9565282929299184	1.033e+16	2120228613020510	2190186711434840
1360474	0.019756073012643986	0.8883357082413035	5.57_136.0474m/z	0.3087646854492673	0.7579124905147161	1.00296e+16	5274919451302860	5290514462288940
13604811	0.029190605839090295	0.8356290788949348	10.94_136.0481m/z	-3.12237e+16	0.0021386470679881013	0.9588955608078732	6150035032697990	5.89724e+16
13604812	-0.06487249281090647	0.6444371046978192	10.01_136.0481m/z	-2.08999e+16	0.038241170503844193	0.9751793191308916	4992080634869360	4868173794558410
13605051	-0.09789335770346856	0.4855786346193005	1.43_136.0505m/z	-1.56296e+16	0.1200874171666527	0.9887862130184724	2.66259e+16	2.63273e+16
13606171	-0.13011047506745355	0.35310298041003085	3.09_136.0617m/z	-1.2132e+16	0.2268890578834429	0.8800088057337602	2184132609754410	1.92206e+16
136.06171*	0.17582904981253145	0.2078967772802684	3.32_136.0617m/z	-0.2511641690609516	0.8020177185442672	0.9489034250721474	1.52255e+16	1.44475e+16
13606172	-0.16650017670416228	0.2334279863792652	4.01_136.0617m/z	-0.6324968172131321	0.5279882522243651	0.6134810775206059	0.4395559780330737	0.2696592750343539
13606176	-0.06882370741343527	0.6243618117841314	1.30_136.0618m/z	-2502995240959050	0.013344453983256177	0.9703033966621276	4737908530462080	4597208740181830
1360732	0.05322044158508176	0.7050738764091591	0.76_136.0732m/z	2.1288e+16	0.03484060969337935	1.02128e+16	5.37881e+16	5493262879724140
13607329	-0.06414675951656447	0.6481524698606362	4.15_152.0926n	2.06521e+16	0.040557444973595765	1.01477e+16	6320529900202730	6.4139e+16
13607353	0.03015198802556638	0.8302942553986603	3.28_136.0735m/z	-0.5935825812732479	0.5536510182620609	0.8865119372544326	2710689666678190	2403058747702450
13607568	0.20707589998559084	0.1368124526675133	3.27_136.0757m/z	-2.0169e+16	0.0454208863798763	0.9911747427493638	1.10487e+16	1.09512e+16
13608052	0.24836206073038156	0.07294077293672252	3.73_94.0467n	0.8334838098526445	0.4058462666998967	1.00226e+16	8473277481143940	8492448001921350
13608378	-0.27481100745751313	0.04642888290264035	4.29_136.0838m/z	-2.6918e+16	0.007882639364932548	0.9542315192223041	2110653260056050	2014051866894790
136.08378*	-0.31275073134506	0.0226020047841981	4.37_136.0838m/z	-1.58245e+16	0.11557319462322115	0.930590968711654	1.67789e+16	1561430363509150
13608379	0.09982864648838063	0.4769520926614928	4.80_136.0838m/z	-5853182029401510	2.75355e+08	0.9176209614541679	5536439039668000	5080352514612540
136.08379*	0.0880556397134989	0.5306668532306148	5.21_136.0838m/z	-0.423654310605697	0.6724014908573043	0.9808521262460179	2.75212e+16	2.69942e+16
13608691	0.04148775332655237	0.7680242050083057	1.36_136.0869m/z	-3.47712e+16	0.0006567891102574728	0.9733392807081636	6858370247022190	6.67552e+16
13608692	0.08309646220216174	0.5541514934462672	4.36_135.0796n	-1.08109e+16	0.2813242023816329	0.9567987756748598	2.98397e+16	2855054273466370
13608694	-0.21219635156233732	0.12715777665775788	4.69_136.0869m/z	0.8346974809614213	0.40516448741504063	0.9991574795239708	3146209628930910	3143558882896660
136.08694*	0.25078117171152164	0.07010292695206073	4.72_136.0869m/z	-4525499357121380	1.18827e+11	1.03305e+16	285596946008888	2.95036e+16
13610491	-0.14978328824892329	0.2843987252456929	8.33_136.1049m/z	0.4936599931054828	0.6222406278383183	0.9928256590272208	0.6887616450752161	0.6838202341844742
13610495	-0.33895776697407753	0.01303578842649344	3.63_136.1049m/z	0.9637410956980615	0.3366672923141957	1025765088288470	1970056742094370	2.02082e+16
13610775	-0.05027718989136133	0.7207012137605695	3.92_135.1005n	-0.4613178872501488	0.6452131217720962	1035828479872670	1.18947e+16	1.23208e+16
13611205	-0.02483620607303815	0.8598807230381373	4.08_136.1121m/z	-2275403233417800	0.024243279713540997	0.9903788948601412	9398188668862540	930776770755519
13611208	0.33234553029229463	0.015041848212833327	4.48_94.0783n	-2.25717e+16	0.02538536661084843	0.9986268275125368	782425512428112	7.81351e+16
13646246	0.07394415899018178	0.5987447496876821	9.02_136.4625m/z	0.4671582407183778	0.6410385077951251	1.00094e+16	4.39485e+16	4398958815925530
136.46246*	0.02697308743971189	0.8479619826768258	8.62_136.4625m/z	1.44558e+16	0.15030075329107714	1.0538e+16	4.66286e+16	4913700245386570
13646248	-0.05309948603602475	0.7057137741205414	4.14_136.4625m/z	0.07299612169208929	0.9419027128491296	0.9995968672591656	6569301733073220	6566653432460200
13646251	-0.11184356436137637	0.42526285869709424	0.53_136.4625m/z	1041447495718190	0.29927923136473683	1.02934e+16	5105170583895410	525495216106205
13650957	-0.0683802037335596	0.6266020799042	0.69_136.5096m/z	-0.10600339598300026	0.9157158443989863	1.01933e+16	4914552604019100	5009569799857370
13653895	0.06112287079013936	0.6637239762475804	4.10_136.5390m/z	0.8756972068716184	0.3825410139689596	0.9280589045806008	1.41501e+16	1313210405468630
13654389	0.014151799239669466	0.9198878928591842	4.96_136.5439m/z	0.23552773165419144	0.8141080685625678	0.902787870147292	2.08817e+16	1885177541572590
13658948	-0.2707668539919077	0.0498777851023645	1.31_136.5895m/z	2184516949372980	0.03041688246883292	416124655789896	0.24080259446850175	1.00204e+16
13693105	-0.03124685017305936	0.8242279793257605	0.89_136.9311m/z	0.3462600001654132	0.7296138946622936	1.0191e+16	2.9241e+16	297995306967374
13693107	-0.16252393941626106	0.2449395795101195	0.96_136.9311m/z	-0.8532276018922663	0.394841263182548	0.9936281892478562	6137284735395310	6098179118529350
13693108	0.0576957969001909	0.6815432668733573	0.69_135.9238n	-0.3666016993921361	0.7144128936626496	1.07787e+16	4402128458730840	4744943030353870
13694578	-0.3058159465324584	0.02595157541403947	3.38_136.9458m/z	-0.0900170443907275	0.9283891413112032	1.01445e+16	4347250904229000	4410058328876130
1369458	0.0030238887264250995	0.9828553048590202	1.96_136.9458m/z	0.007820516333056434	0.9937701863842404	0.999115731195979	3.14623e+16	3.14345e+16
13696647	0.2236468102064004	0.10743858870354807	0.55_153.9698n	1.05359e+16	0.2937019003422713	0.9884980234541626	4.34163e+16	4.29169e+16
13697334	0.2601753860216156	0.05990600910199133	0.73_136.9733m/z	-3.03322e+16	0.0028347683798690213	0.9262087476401388	446471959424928	4.13526e+16
13701053	-0.02447333942586714	0.8619078158121374	1.43_137.0105m/z	-0.24427840975250145	0.8073361908927268	1006927603415920	62546622362244	6297992055697500
13702657	-0.006733192230839889	0.9618357587835302	1.56_137.0266m/z	-1.93732e+16	0.05451241689401902	0.9244269934475028	5259774381367750	4862277417579980
13703213	0.12535026733940846	0.3711410673828884	1.05_137.0321m/z	-0.3396595050537043	0.7345698193377017	1010242800214100	3649441003090170	3686821498177990
13703454	-0.20006051392586302	0.15091727674881278	1.65_137.0345m/z	-3185698927076750	0.0017442466789175735	0.8569323404621849	4154869138241430	3.56044e+16
13704356	-0.19175486377170367	0.16897292655271728	1.86_137.0441n	1.30552e+16	0.1936382515949186	0.97068297583748	4169665715326090	4.04742e+16
13704358	-0.06981053680883734	0.6193891399348292	3.49_137.0436m/z	1.02028e+16	0.30917701582805324	inf	0.0	0.004253404637815152
13704572	-0.11349662353182208	0.4184088222335034	3.60_137.0457m/z	0.7224712662182095	0.47108645575259706	1.00092e+16	525908293849238	526394612897174
13704573	-0.045358330896376496	0.747069655355063	1.84_136.0385n	1.56661e+16	0.11923261218321032	1012482754150780	1.19057e+16	1.20543e+16
13704575	-0.15954036920618828	0.25382706703371577	3.49_137.0458m/z	0.04397656898326217	0.9649793209431048	0.9876089897912514	8997669256973390	8886179045355290
13704578	-0.07624231442226488	0.5873998041113245	2.75_137.0458m/z	2195629419458500	0.029595305522918187	1.05293e+16	5682885686095220	5.98365e+16
137.04578*	-0.12874862105874088	0.3582076987300946	4.65_137.0458m/z	1.63509e+16	0.10404664426228853	1085824029827160	2037869710749710	2.21277e+16
13705969	0.2604979341524343	0.05957833100818216	3.27_137.0597m/z	-2.08833e+16	0.03839234016704117	0.982963547355025	6851408700978800	6734685001093210
137.05969*	0.1551456509237838	0.26731040369559644	4.79_137.0597m/z	-0.9671796909252276	0.33495125045389473	0.9934319228191898	641161981344557	6369507799656840
1370597	0.3713335356050023	0.006190461773351096	5.44_137.0597m/z	-1805277237860050	0.07295965072126065	0.9905337793858776	7027653079940380	6961127765486150
137.0597*	-0.08293518813675241	0.5549234247847267	6.91_137.0597m/z	1.58504e+16	0.11498335777196572	1.0139e+16	7004483699190140	7101874629831070
13707089	0.0574538858020769	0.6828077781430986	0.90_137.0709m/z	1.74659e+16	0.08267607111297537	1.03202e+16	7091880769727830	7.31896e+16
13707093	0.08168531412983003	0.5609231196259046	4.66_137.0709m/z	1.16729e+16	0.24487243559303845	1.00845e+16	4458942855140350	4.4966e+16
137.07093*	0.28811611785378355	0.036430442712860896	2.91_137.0709m/z	-0.8069364063953294	0.42093167613020976	0.9903140682172458	4700121327677000	4654596273126450
13707791	-0.10414272773808043	0.4580187637589616	8.03_137.0779m/z	0.7867839223751849	0.4326019848332592	1.00251e+16	3.48265e+16	3491383193066020
13707901	0.0345529685139508	0.8059729586517965	3.80_137.0790m/z	-65324921028908	866868	0.893289004540647	4.07357e+16	3.63887e+16
13707902	0.18058663474210696	0.1956618960983373	3.27_137.0790m/z	-3271723265437440	0.0013159873328407164	0.9807402600310348	8339563665063510	817894583741976
13707903	-0.2286463062340899	0.09960455520257076	1.97_137.0790m/z	-0.7446462473792961	0.4576058981899636	0.9593998639853312	0.9990156179247489	0.9584554479562261
13709026	-0.10740852756261957	0.44396273568026745	1.36_137.0903m/z	-1.12393e+16	0.262767354114512	0.9964330827312752	3.32136e+16	3.30951e+16
13709606	0.01306319929815643	0.9260324882203704	1.06_137.0961m/z	0.15697504782783953	0.8754674918116327	1.00918e+16	4776447147191900	4820316876391820
13709608	-0.06132446337190103	0.6626813879205382	5.61_137.0961m/z	-0.9563677009161284	0.3403662184959564	0.9939677963294491	7679863704712950	7633537202684050
13709609	0.14933978456904762	0.2858434464013697	4.73_137.0961m/z	-1823897666896680	0.07008127894741321	0.9939482118866044	7428849495090740	7383891672020150
13710729	0.10818330277797897	0.440663532565642	3.67_137.1073m/z	-1.55806e+16	0.12124459662286645	0.8440384076411068	2.67379e+16	2.25678e+16
13710732	-0.20139098917991166	0.14816288249264353	4.65_137.1073m/z	-0.6935847649625348	0.4889740828680576	0.991096096256304	5479297041875440	5430509908431460
1371121	-0.023918525152829998	0.8650088937836629	3.66_137.1121m/z	-0.3478682962675545	0.7284080360502869	0.8676806702497218	1.09066e+16	0.9463408299234296
13713244	0.05926821903793196	0.6733452229278889	10.00_137.1324m/z	-5269259040501370	4.48734e+08	0.9501329201989211	5309449688835660	504468293750268
13713245	0.09394214310093978	0.5034424317170203	8.63_137.1324m/z	-2.09644e+16	0.03765659095696019	0.989376673981685	7601107282507440	7520358241745180
137.13245*	-0.07906461056692829	0.5736010927855627	8.12_137.1325m/z	-0.6820736475607424	0.4962038433675901	1000382715861260	7.95546e+16	7.9585e+16
137.13245**	0.10390081663996643	0.4590694958005866	6.90_137.1325m/z	-0.08006190319617197	0.9362906375562172	0.9985696186398424	5483682655509610	5475838898054150
13713246	0.2092127813522646	0.13271871155228826	6.31_136.1252n	-2545205741046050	0.011891751024366824	0.9902830421251706	8091671254347190	8013044825631730
137.13246*	-0.10486846103242246	0.454874436520251	7.22_154.1358n	-0.3749815899838856	0.7081834625914474	0.9977478854131754	7274096441017370	7.25771e+16
137.13246**	0.17381312399491475	0.21324007240400691	7.59_137.1325m/z	-0.555062788656401	0.5796467352292587	0.9962174376201384	6416854004003710	6392581853451100
137.13246***	-0.018385243456664608	0.8960395573680673	4.76_137.1325m/z	1.39967e+16	0.16359831672191086	1.00928e+16	5660689900099760	5713243010594920
137.13246****	0.14180022201116102	0.31113918581247885	5.21_137.1325m/z	-1.4232e+16	0.15667435987909895	0.98343086076432	4793938153547040	4714506724793680
137.13246*****	0.12345529707084875	0.3784733959332506	5.04_137.1325m/z	-0.3976887634397437	0.6914032771385583	1.01439e+16	475598049901298	4824398085906420
13713329	0.10579578690852616	0.45087391157248297	2.07_137.1333m/z	0.3828580001212118	0.7023462170071679	1.00124e+16	7267038312855370	7276053489281760
13752401	-0.14881564385646728	0.2875570373107126	1.74_137.5240m/z	-1.013e+16	0.3126277043243516	0.9870881890230936	2141603616690140	2.11395e+16
13755544	-0.010112573241060777	0.942707802904208	4.11_137.5554m/z	2.36252e+16	0.019384924789017037	260558899840216	0.24326032332173456	0.633836422194864
13796408	0.051285152800169695	0.7153362536501973	13.00_154.9674n	-0.17235298398015894	0.8633834299834872	0.9996744121880696	1.08885e+16	1088493918174420
13796414	0.2045761519717461	0.14172047253700934	0.56_172.9780n	-0.991776913206888	0.32284219556728666	0.9984634527920014	8192811756550850	8180223114520660
13796649	-0.02019957669251967	0.8858454410498385	3.38_137.9665m/z	-1.1185e+16	0.2650740417810312	0.9964976064888408	4370879994862160	4355571453130100
13796741	0.07422638860464811	0.5973463288546021	0.55_137.9680n	0.10590739294412464	0.9157918902824352	1.01024e+16	4305991662572170	4350097294862290
13797633	-0.11631891967648553	0.40685383852895296	0.69_137.9763m/z	-0.3598250588116237	0.7194646155830133	1.04184e+16	2211395628148850	2303930931843450
13800443	0.1609657619254707	0.2495542963558149	0.70_138.0044m/z	0.7623656482568036	0.4469929588376066	1.10554e+16	0.11568449815668433	1.27894e+16
13801731	-0.21711521055732216	0.11837636151018115	9.56_138.0173m/z	1.2316e+16	0.21995205913026852	0.9702342688640448	3747382829691710	3635839239919620
13801733	0.12208446751486934	0.3838311704994338	9.98_138.0173m/z	0.8106852996819355	0.4187814551055408	1.01909e+16	6.63269e+16	6.75933e+16
13803837	0.16320935419425073	0.24292816448064644	0.95_138.0384m/z	-1.16093e+16	0.24744219326260855	0.9951029041155952	6179042699397250	6.14878e+16
13804909	-0.07104122581281369	0.6132112668386811	1.84_138.0491m/z	0.05500477931944854	0.9562050378364866	1.00237e+16	8733883633928920	8754559883740900
138.04909*	0.05813930058006659	0.67922725124381	3.60_138.0491m/z	-0.8959565165364838	0.3716564335939634	0.9659946429740204	5048277322550980	4876608849831480
1380525	-0.08962806185123996	0.5233242663459095	0.76_138.0525m/z	1.31933e+16	0.18899153530718013	1.01867e+16	5818317415335570	5926963134961120
13805256	0.03499647219382649	0.8035316726738583	1.97_138.0526m/z	0.06187018233733273	0.9507454108374191	1.01208e+16	2.80182e+16	2.83566e+16
13805488	0.11555286786579115	0.4099717800589516	0.96_137.0476n	-1316215714963840	0.19003234398074476	0.9760915280185138	1.11811e+16	1.09137e+16
13805497	-0.1225682897110974	0.3819350697155313	0.57_138.0550m/z	0.17213575641892429	0.8635539109800544	1.00714e+16	4790503654608700	4824684170829490
13806301	0.0272149985378259	0.8466147629895769	4.07_138.0630m/z	-0.7306616014579126	0.4660818096645361	1.00172e+16	3190508439730200	3195987232473450
138.06301*	0.040560427450448674	0.7730697229505872	3.83_138.0630m/z	-1.14332e+16	0.25465652191300314	1.18157e+16	1.96384e+16	2320417254553800
1380661	0.2363471428573858	0.08841158715914342	2.25_138.0661m/z	0.09511549420320396	0.9243451589190708	0.9833389870259298	2286658034551420	2.24856e+16
13806611	-0.024312065360457803	0.8628090300595089	0.99_138.0661m/z	0.3118018857625937	0.7556074220109277	1.03947e+16	4346982891858060	4518557970820930
13806612	-0.007297651459772574	0.9586390357931898	1.55_138.0661m/z	-1.56115e+16	0.12051578334802235	0.9887938031382552	2504059698204450	2.476e+16
13806613	0.20901118877050287	0.13310093579633267	5.44_138.0661m/z	-0.14969976393440654	0.8811948599642941	0.9995177078822054	3.57476e+16	3.57303e+16
138.06613*	0.11563350489849585	0.4096429282135627	4.00_138.0661m/z	-2.52787e+16	0.012470440098886666	0.8867262522883116	3.37357e+16	2.99144e+16
1380662	0.2379195649951269	0.08625202490247222	4.51_138.0662m/z	-1.41153e+16	0.1600795418250526	0.9959338067137704	7510017014218560	7479479833455870
13807423	0.094796475896768	0.4995516085229537	0.90_138.0742m/z	1.93282e+16	0.05506977488254542	1.09867e+16	2.12466e+16	2.3343e+16
13807593	0.4094211060891788	0.002332887685309861	1.03_138.0759m/z	-3.41237e+16	0.0008204090849243973	0.8428364721416705	1.97643e+16	1665803767561390
13807603	-0.22211470658501165	0.1099317259161224	1.48_138.0760m/z	-0.4419494109212496	0.6591378638903995	0.9828412430313556	3.50244e+16	3.44234e+16
13807604	0.050438463956770666	0.719841915368424	1.59_138.0760m/z	-0.26444394477729444	0.7917869051020082	0.9846867567432716	2.85389e+16	2.81019e+16
13808238	0.20667271482206748	0.1375953423756678	3.27_138.0824m/z	-2956170237910520	0.003598906210654925	0.9456783461363812	4548088902615650	4301029191506800
13809129	0.3748009280113031	0.005690376536394264	3.79_138.0913m/z	-4379345739603110	2.17343e+11	0.9823362417374484	7525740450145700	7392807590087620
13809131	0.25735308987695216	0.06283545554099658	5.83_138.0913m/z	-0.5570254496644037	0.5783083314950871	1.02349e+16	4824330168413710	4937639485197200
13810251	0.15361354730239507	0.2721212908690309	10.06_138.1025m/z	-0.0854399684948763	0.9320211754084988	1.03088e+16	2064582282789170	2.12833e+16
13812768	0.3799213795880496	0.005016549980539001	3.92_138.1277m/z	0.11443733617606912	0.9090382737333582	0.9887518703746696	3431467784609320	3.39287e+16
138.12768*	0.33524846346966275	0.014130814497303053	4.25_138.1277m/z	-0.5498336855334478	0.5832197774174487	0.9894717360683402	2918688641023410	2.88796e+16
13812769	0.11918153433750127	0.3953247048944102	7.18_138.1277m/z	-0.07164600029085731	0.9429754019195694	1.00974e+16	2.2174e+16	2.23901e+16
138.12769*	-0.13462352610044545	0.33650773483926805	7.46_138.1277m/z	-1892599310856490	0.0602635203156863	0.9952202624727938	1.74658e+16	1738235953065980
13812849	-0.10636024613745884	0.4484483036234366	0.72_137.1212n	1.19971e+16	0.2320725429826887	100402733534437	5.58643e+16	56089311080316
1381358	-0.15837113223197058	0.2573686617706139	8.48_138.1358m/z	-0.6555861420974629	0.5130561050900203	1010406359373920	1.48736e+16	1.50284e+16
13813582	-0.273843363065057	0.04723583704618208	7.63_138.1358m/z	0.2317334450862712	0.8170487465321153	0.9217262080348441	1.06466e+16	0.9813287138821479
13813641	-0.0032424702513084713	0.981616207740921	1.25_138.1364m/z	-0.7960353466274104	0.4272211623323711	0.2507108777825165	0.32162599830203864	0.08063513635198227
13813952	0.06551758907254382	0.6411417729955566	2.07_138.1395m/z	0.6653760747578302	0.5067925435587414	1.00201e+16	6447540573423920	6460508191172860
13854135	0.10595706097393552	0.4501801464085584	4.55_138.5414m/z	0.6089845285941529	0.5434205073913634	1.00302e+16	7.37268e+16	7394964632278930
13890636	0.3514565070433012	0.009864867071384495	0.80_115.9171n	0.901027612528054	0.3689625633682628	1.00342e+16	7012547712202650	7036515092899570
13896747	0.025037798654799825	0.858754946524587	0.63_138.9675m/z	-0.6956974449509132	0.4876534271976313	0.9582759565343064	1.67412e+16	1.60427e+16
13897085	0.12010886021360495	0.3916314147340956	1.04_155.9741n	-1.13479e+16	0.2582034269731019	0.9988004765052696	7099100733022200	7090585194901480
13897195	-0.1168833789054182	0.4045652172618893	0.68_138.9719m/z	-0.6020133974898738	0.5480391884343928	1.0001e+16	3731006936263000	3.73137e+16
13897196	0.0454792864454335	0.7464176515267118	12.79_138.9720m/z	-0.09096135971695556	0.9276399863032676	0.9998317270810156	7522896467725550	7521630567977710
138972	0.21280112930762235	0.1260523239649452	0.53_138.9720m/z	-0.5481384052799539	0.584380382592198	0.9662230202940983	5.41522e+16	5232308114433680
138.972*	0.004394718282404478	0.9750851122069278	11.52_138.9720m/z	-1100460213207470	0.2728268432591968	0.9923202944277094	5479933467122180	5437849191538940
13898003	-0.021691361797556048	0.8774772477587307	0.53_96.9462n	0.8062353180976911	0.4213345184036913	1.06316e+16	6777244227257610	7205284884353330
13898787	0.1297046671054606	0.3546194038237219	9.94_138.9879m/z	-0.28543131712465586	0.7756923410439379	1.13573e+16	2940107977534750	3.33918e+16
13898789	-0.07067835916564266	0.6150300590425348	9.21_138.9879m/z	-0.4528777232876336	0.6512660184703818	1012730801320120	5404914650215420	5473723544779560
13899171	0.023828243164229792	0.8655137079157256	1.24_138.9917m/z	-0.5221407511243934	0.6023129669375811	1001475226509860	4481295329936870	4487906255606130
13900028	0.017610171141737352	0.9003996024654116	1.86_139.0003m/z	4.81799e+16	3.40829e+10	inf	0.0	0.1409444820362794
13900252	-0.0860800324122345	0.5399634941963183	1.85_139.0025m/z	1310636182249380	0.19190695968879493	1.02952e+16	8013181996884470	8249749610601700
1390154	0.021973591412022396	0.8758955410290015	0.88_139.0154m/z	-0.2861519481721721	0.7751413911328706	0.990234805529409	5639993285486040	5584917654240440
13901543	0.07116218136187068	0.6126055151248165	8.76_139.0154m/z	0.5633082730953336	0.5740337600645284	1.00549e+16	6.83066e+16	6868194984501340
139.03655*	-0.031045257591297688	0.8253441845989244	3.24_139.0366m/z	0.5247375805250191	0.6005105191641298	0.9767682222883088	3.83064e+16	3741646677995550
13903889	0.03943150899258329	0.7792246566360922	3.48_139.0389m/z	-1029532745077120	0.30482299176507743	0.9963281944315744	6403097588080180	6379586658701100
1390389	0.02568289491643718	0.8551543444062204	7.95_139.0389m/z	-0.8477662840684193	0.3978669745497181	0.9992601275590404	4371366983621430	4368132729660930
13903892	0.20441487790633675	0.142041566791221	2.80_139.0389m/z	-0.5126513753278911	0.6089203276250132	0.9952723619198178	7257699209454050	7223387434296930
139.03892*	0.1676040724766552	0.23029922264230196	6.56_139.0389m/z	-4985425505929760	1.62878e+10	0.9835968262470888	5504383995026710	5414094627953540
139.03892**	0.31928233099413816	0.01978807473616321	4.09_139.0389m/z	-1.35109e+16	0.17862347096084832	0.9903444985339158	5078809530888880	5029771078017420
13903893	0.2517084975876253	0.06903867931249384	1.30_139.0389m/z	0.94006182263409	0.3486391773747225	1.0018e+16	5977522392197470	5.98828e+16
139.03893*	-0.2271545211290535	0.10189436463003246	5.87_139.0389m/z	0.3313627840847874	0.7408151849233364	1.02266e+16	5003451839930140	5116837740596980
139.03893**	0.0172160064824469	0.9026180398204409	3.98_139.0389m/z	-0.32270469787304995	0.7473510003381996	1.00468e+16	5.28964e+16	5.31441e+16
139.03893***	-0.070234855485767	0.6172561479266231	3.78_139.0389m/z	-0.09806507968875228	0.9220065043915068	0.9965283050751024	514524398367357	512738126624809
139.03893****	-0.09805463176887792	0.4848566413198016	3.65_139.0389m/z	-0.5667851743877897	0.5716747332290548	0.998610254729402	443766928485632	4431502054955210
13903894	0.15127507335395965	0.2795744468919381	1.62_139.0389m/z	-130554488309799	0.19362948791625892	0.998579209280171	6673322306861500	6663840912457480
139.03894*	0.05656687844232554	0.6874516908500483	0.62_139.0389m/z	-0.3261037477933834	0.7447829085658663	0.9980486622937632	6203152432963080	6191047987723110
139.03894**	-0.048624130720915607	0.7295285879695788	2.44_139.0389m/z	-0.6720253545334297	0.5025616129283508	0.9976044187877257	6400296017974840	6384963589081190
139.03894***	0.18534421967168246	0.18394798578144755	4.58_139.0389m/z	-0.9732907602334151	0.3319155690338487	0.9944574090622564	5154303060356890	5125734866924170
13903895	-0.06987198883859598	0.6190800358347298	7.74_139.0389m/z	1.01667e+16	0.31088338569074225	1.00362e+16	4588274967240880	4.60487e+16
13904231	0.04104424964667669	0.7704361032108238	1.03_139.0423m/z	-2144924887708000	0.033506852637210115	0.931473641503009	3927278639178120	3.65816e+16
13905014	0.053663945264957436	0.7027293193280164	2.44_138.0429n	0.017098514019485225	0.9863798731168094	0.9855645649224758	6890052258434770	6790591356377380
13905015	0.14990424379798026	0.2840055439327849	1.68_138.0429n	-0.6656553673156207	0.506614450442643	0.994454730713262	7295131410822310	7254677942667160
139.05015*	-0.1644592282011731	0.2392893588820667	3.71_139.0502m/z	-0.3438121480573256	0.7314505261003599	1.00197e+16	4475157539189670	4483967473924040
13905017	0.017578873129617912	0.9005757265599318	4.44_139.0502m/z	-0.0285361653095579	0.9772709974542452	0.998024077985206	4459174631972060	4450363650648940
139.05017*	0.091200483988981	0.5160326179938708	4.96_139.0502m/z	0.6173743030109016	0.5378879733007037	1.00638e+16	4562167494535950	4591276511949220
13905021	0.2642878746895537	0.055835126180034535	3.95_139.0502m/z	-3762033083985220	0.0002380274322078288	0.9410115667256344	5898331031007580	5550397724554870
13905241	-0.08846595836559294	0.5287459473491944	1.84_139.0524m/z	1014858499168070	0.31174470075734123	1.12335e+16	3.00168e+16	3371944952284070
13905823	0.1138594901789931	0.41691276943529504	0.96_139.0582m/z	-1.31246e+16	0.19129282371027825	0.97734119913218	8235326682092530	8048724054721550
13905826	0.2736820889996477	0.0473714353448966	1.50_139.0583m/z	-0.7030118346621308	0.4830961856919931	0.9015911873942308	2239094925156170	2.01875e+16
13906126	0.21316399595479335	0.12539254730244978	3.08_139.0613m/z	0.8448466163968841	0.3994903177340315	0.997349825913906	1.57176e+16	1.56759e+16
13906274	0.1282372406488081	0.3601361091855681	6.28_139.0627m/z	-2.12961e+16	0.034772585449720186	inf	0.0	0.09228499596725598
13907264	0.12369720816896275	0.3775325662082256	2.18_139.0726m/z	-0.3142067316246092	0.7537838316188291	0.993132298331558	6536252253175890	6491363222671400
13907267	0.2335248467127224	0.09239354252536232	2.02_139.0727m/z	0.13739664075963165	0.8908944597377663	0.997125796654836	5586078186377780	5.57002e+16
13908653	-0.05781675244924792	0.6809113363206738	1.62_139.0865m/z	-2769514249310840	0.0062954003834446	0.9819520484043092	5753869057956100	5.65002e+16
13909466	0.22429190646803776	0.10640193866774883	3.79_139.0947m/z	-2462001312459140	0.014904802470653076	0.9299643556232818	4055365404120820	3.77135e+16
13909468	-0.11087591996892032	0.4293043126262529	3.95_139.0947m/z	-2.1812e+16	0.03066624137694627	0.9036567265475309	3401191068517340	3.07351e+16
1391117	-0.13087390407967833	0.35026100203962585	8.40_156.1150n	-0.9760534809888616	0.33054909459684845	0.9950269931926105	7917696014220560	7878321258043000
139.1117*	0.10353794999279542	0.4606480478144072	6.35_138.1044n	-1.03756e+16	0.3010811596135031	1.00229e+16	7.92144e+16	7939601452781740
139.1117**	0.02858582809380528	0.8389888416023082	4.16_139.1117m/z	-1.24577e+16	0.21471588632802852	0.9999009525788976	6891232025135190	6.89055e+16
13911171	0.12095554905700398	0.3882770909285127	5.53_156.1150n	-1.14706e+16	0.2531143060981181	0.99405556639957	9290080479248740	9234856212697190
139.11171*	-0.05523636740269849	0.6944390149577928	6.72_139.1117m/z	-1.48643e+16	0.13918345934454202	0.993700304303019	7156617060950270	7111532551246460
139.11171**	-0.061687330019072034	0.6608063271453173	3.93_139.1117m/z	-0.3165335217635309	0.7520207492950504	1.00257e+16	6456270768646550	6472854250635640
13912293	0.08345932884933276	0.5524165145694148	4.32_139.1229m/z	-1.06045e+16	0.2905806986887241	1.00044e+16	4.85072e+16	4852855181659700
139.12293*	0.15982272443312354	0.2529767769831752	4.01_139.1229m/z	1.03765e+16	0.30103651918356983	1.1412e+16	0.4303316078560475	0.4910943494174198
13912295	0.2180828549497782	0.11670454607329575	4.75_139.1229m/z	-1.80267e+16	0.07337075667795136	0.9799349908833356	3609920116350630	3.53749e+16
13913104	-0.2603366600870249	0.05974198927005475	4.01_139.1310m/z	-1.83107e+16	0.06899870328684643	0.9830295834108884	2.05953e+16	2024576831329560
13953092	0.23933071306745854	0.08434935349502118	0.71_139.5309m/z	0.4460904208349216	0.6561504768356283	0.9316815073781974	2832452922945920	2638944008828040
13953093	-0.18195746429808635	0.19223362834545651	1.25_139.5309m/z	1.3419e+16	0.18157974383538075	1.05151e+16	415682224575894	4370957926386830
13954839	-0.029150287322737962	0.8358529732583861	5.07_139.5484m/z	0.7250462753553221	0.4695097963582661	0.9675002131501024	1.70693e+16	1.65146e+16
13954844	-0.19852716387615	0.1541384173845975	4.85_139.5484m/z	1.84892e+16	0.06636175743126321	0.7989535049953382	0.21068923197557607	0.16833090035166245
13997984	0.35766555856156085	0.008554587874383424	2.75_139.9798m/z	-0.13138817805802402	0.8956375340356646	0.9983720314968074	4994404369798870	4986273636792630
139.97984*	0.21707489204096986	0.11844641383275442	3.42_139.9798m/z	-0.5309806079261282	0.5961873681188444	1.0265e+16	2591624193054130	2.66029e+16
139.97984**	0.2767866147587775	0.044816297545659696	1.93_139.9798m/z	-1.05821e+16	0.2915976038612464	0.914926807383772	2.86562e+16	2.62184e+16
13997986	-0.12740651167337755	0.3632822296930767	0.59_139.9799m/z	-0.5099574424669738	0.6108020059665347	0.9555484730852024	2382151379203630	2.27626e+16
1399878	0.12139905273687968	0.3865268620591719	0.50_97.9540n	0.43831334777586994	0.6617655114094552	0.997393523973165	9315530500852960	929124979392524
13998783	-0.10128011307706468	0.4705360138454096	12.99_139.9878m/z	-0.19730785328086087	0.843843479622975	0.9977693644347658	1.18072e+16	1.17809e+16
14000581	-0.08301254673570417	0.554553087562561	2.70_157.0091n	0.2325153802423467	0.8164425107447241	0.5254914786987164	0.3748986307978803	0.19700603586010226
14001067	0.15994355436971164	0.2526134962391377	8.90_140.0107m/z	-0.7758747229868316	0.438997619789669	0.938547289953082	3.74025e+16	3.5104e+16
14001629	0.03948706919844228	0.7789214210742851	4.42_140.0163m/z	1.94712e+16	0.05331644155556565	inf	0.0	0.07598472893810637
14001634	0.017862299898369002	0.8989809662061695	3.83_140.0163m/z	1.29932e+16	0.1957502432008166	4150269489795950	0.506210905895498	2.10091e+16
14001638	-0.07580986837229846	0.5895272067654095	4.09_140.0164m/z	-0.3524300563382157	0.7249914462948752	0.3457775886880862	0.10586937195237847	0.03660725614961553
14003412	0.14337264414890208	0.3057489082207029	1.77_140.0341m/z	-2853616642981460	0.004909655593003216	0.9271782900045942	5536066157860300	5132920353597220
14003414	0.12442294146330478	0.3747184793379907	2.18_140.0341m/z	-0.8113458654966638	0.4184032572980473	0.9930627125377084	4453368625925710	4422474327592110
140.03414*	-0.07612135887320784	0.5879944931975776	0.88_140.0341m/z	-2.02663e+16	0.04440353477399247	0.9356545926922336	3.65877e+16	342334261617369
14003752	0.027900413315815588	0.8428000144505912	0.85_140.0375m/z	-2329996890222110	0.021087707396391604	0.8052772566411122	5704826898332210	4593967354301390
14005349	0.20058461885286494	0.14982777290845908	1.68_140.0535m/z	0.8451501520998913	0.3993213639119655	0.9977667349214568	5735522413554730	5722713471641340
1400544	-0.23992847249627336	0.08355338950426118	4.75_140.0544m/z	2060296846594440	0.04103118834989524	0.34274669792945106	0.14799198586381412	0.050723764474844286
14005441	0.2327184763856757	0.09355653178964148	4.82_140.0544m/z	-1.10601e+16	0.2704244439591455	0.9817596968902956	4619057101849690	453480410023092
14006153	0.1440983774432441	0.3032814765506045	0.96_140.0615m/z	-1.47619e+16	0.14190762969188034	0.9373523467719336	480967855370861	4.50836e+16
1400681	-0.01536135473023951	0.9130660191468986	10.76_140.0681m/z	0.4266426536998231	0.6702278086934566	0.9998345168279066	5.09872e+16	5097877285098600
14006811	0.2034069149975284	0.14406069792922965	10.93_140.0681m/z	-5080931314837220	1.06101e+10	0.97694721757789	7098383590272770	6934746097817530
140.06811*	0.1859086789006152	0.18259238478304515	10.49_140.0681m/z	0.4199785148862367	0.6750790120954647	1.00624e+16	5863025811004180	5899582654151030
14006812	-0.015925813959172194	0.9098845737067376	10.01_140.0681m/z	-2.9481e+16	0.003688983793388553	0.9883838664345608	6516481811895650	6440785488791910
140.06812*	0.09587743188585184	0.4946509857472464	1.40_140.0681m/z	-0.7127365973367771	0.47707349126014204	109614950866798	3.05553e+16	3349313998757710
1400705	0.232879750451085	0.09332302715914892	1.09_157.0738n	-2.45015e+16	0.015385321445149562	0.9607851169373598	5574897100130500	5356278162262630
14007054	0.1586533618464369	0.2565107640853183	3.52_175.0844n	-4488389522069310	1.38696e+10	0.9604668910093596	7282185519203220	69942980853825
140.07054*	-0.0010079629088083665	0.9942847222752058	1.46_157.0738n	-4058679020716050	7.78333e+10	0.9871231936063548	6.88951e+16	6800790467139930
14007866	0.15462151021120346	0.2689498062640829	4.08_140.0787m/z	-0.08796841906996249	0.9300145995627458	0.9924145787185612	3.34636e+16	3.32098e+16
14007867	0.2919463769072553	0.03390731908230135	4.31_157.0820n	-0.8470561267460878	0.3982614540896925	0.8770906463264231	4257115323902530	3.73388e+16
140.07867*	-0.1001511946191993	0.4755222942686039	4.95_140.0787m/z	-0.5552304692099873	0.5795323309928088	0.9793281596256814	3312073105460270	324360645891613
14008175	0.09910291319403862	0.4801774709206024	3.42_140.0818m/z	-2006885735443120	0.04648923232733213	0.8478861661883554	2.63564e+16	2234725345233850
14008176	-0.14544061614616852	0.2987519133758009	0.50_140.0818m/z	-0.9648889909435115	0.3360937978187064	0.9211805935664356	3.93891e+16	3.62845e+16
14010072	0.1392601554809639	0.3199742104433365	3.24_140.1007m/z	0.042943385138005226	0.9658015804460208	1.00494e+16	1.13327e+16	1.13887e+16
14010693	0.2985989321053905	0.029869919836213163	4.09_140.1069m/z	-1.60164e+16	0.11125850557702062	0.9700732304606238	633747492422164	6.14781e+16
140.10693*	0.03330309450702843	0.8128627518973774	3.52_140.1069m/z	-0.9464253192554821	0.34539536288559314	0.9952080341138608	5569853094269880	5543162548251330
14010694	0.02213486547743173	0.8749919240967414	1.44_140.1069m/z	-2357030960561740	0.019663325376192697	0.9790223124173512	5916973270593260	5792848853887870
14014323	0.08970869888394463	0.5229490918084578	5.97_140.1432m/z	0.7265326167148525	0.4686010627626021	1.14551e+16	3.04929e+16	3.49299e+16
14014331	0.4351980655071004	0.0011270852960040914	4.08_140.1433m/z	-3.38502e+16	0.0009004249684512227	0.9853384821602348	670829405174531	6609940278831250
1401521	0.14042939245518166	0.3158877132980768	2.06_140.1521m/z	0.7275743949031741	0.4679647167879138	1.00085e+16	842041226731099	8427537678781740
14049871	0.014030843690612462	0.9205704031249292	8.63_140.4987m/z	0.159597077498595	0.8734049316968253	0.8750857377036312	3.8749e+16	3.39087e+16
14090338	0.3384336262614972	0.013185958876607095	0.80_140.9034m/z	1.24473e+16	0.2150981331095704	1020454978517720	6506142753745230	6.63923e+16
14091694	-0.00044350367987568135	0.9974852609753436	0.71_140.9169m/z	-1.28716e+16	0.19994633907916906	0.9979854335170464	7031166749547860	7017001996678170
14095117	0.029109968806385625	0.8360768805271442	13.00_140.9512m/z	0.12785667870065145	0.8984270657125311	1002485734110700	93508801935525	9374123995414740
14095118	-0.012982562265451759	0.9264878181928204	8.59_140.9512m/z	1256432163412850	0.2108375347244464	1.00522e+16	9057296476405660	9104551156379140
14096166	0.15740348783951452	0.2603246775479682	0.53_140.9617m/z	0.34874308750804306	0.7277524249336079	0.9976167226688428	8176799592232250	815731201112267
14096614	0.2581997787203512	0.06194480456958001	1.85_140.9661m/z	1.50506e+16	0.13433057586848726	1.08069e+16	4021330710651830	4345797221906630
1409662	0.2880354808210788	0.036485184980796455	3.29_140.9662m/z	-0.4103217715809718	0.6821329073500699	1.01537e+16	1.45917e+16	1.48159e+16
14096645	-0.036165709168044194	0.7971045203172615	0.55_140.9665m/z	0.2218157273769955	0.8247474435112253	1.01673e+16	3.8188e+16	3.88268e+16
14097034	0.16832980577099724	0.22825811281920702	0.53_140.9703m/z	0.22724154919572398	0.8205334521653797	1.09488e+16	213928414137176	2.34225e+16
140971	-0.012297147487462074	0.9303590516463224	0.98_140.9710m/z	-0.3962477789099768	0.6924637083684033	1.01085e+16	4117806314374040	4.1625e+16
14097546	-0.08833786932796525	0.5293452270009553	8.58_140.9755m/z	0.3322876245653233	0.7401181468856086	1.0047e+16	888582737592317	892754639660547
140.97546*	0.02939219842085197	0.8345098012568911	0.53_140.9755m/z	0.7020279461491792	0.4837078366244789	1.08087e+16	610369838266258	6597298913093610
140987	-0.06567886313795318	0.6403190077984151	1.50_140.9870m/z	1.85132e+16	0.06601454471859503	0.91435142457553	0.07516784506026444	0.06872982621312551
14098701	0.044068138373101785	0.7540352080368552	1.24_157.9903n	0.20193803372101296	0.8402282649059544	1.00436e+16	8186244957891070	8221919871995570
14099119	0.26969055588076657	0.05082995643815173	0.50_140.9912m/z	-0.20841337429419826	0.8351780792173504	0.9915478219952726	5980049612780160	5929505168975840
14099564	-0.13244632621741936	0.3444519366958352	12.99_140.9956m/z	-0.3885051525335272	0.6981719442968807	0.9962017035059012	9998534681787530	9960557282559570
14099565	0.2280818470051572	0.10046623973037012	0.50_98.9618n	-0.4648482910051594	0.6426882715826057	0.9899908517603654	7.87e+16	7791223636039140
14100037	0.02483620607303815	0.8598807230381373	8.42_141.0004m/z	-1.0678e+16	0.2872622306036418	0.989167333793232	5535694980248800	5475728644305290
14101576	-0.025037798654799825	0.858754946524587	2.00_118.0265n	0.9199229832078052	0.359033307848014	1.03837e+16	5802510434696800	6025170776735020
14101806	0.02401004807127599	0.8644971955100321	0.83_141.0181m/z	-0.2324339499605676	0.8165056386281827	1021317698825630	1.9674e+16	2.00934e+16
14101815	0.35388566960784856	0.009332932055352548	1.92_141.0181m/z	-1581047306955650	0.11589262485726193	0.8427912260434516	118926887500893	1.00231e+16
14101816	-0.09101096965779294	0.5169087173957172	8.52_141.0182m/z	-1.89031e+16	0.060571217872511275	0.5936317547136586	3.30561e+16	1.96232e+16
14101817	-0.08084858713298802	0.5649565569713575	7.62_141.0182m/z	4.67845e+16	6.22539e+09	inf	0.0	0.25730819271535266
14101818	0.3126297757960029	0.022657140617905133	7.24_141.0182m/z	-0.7153484494667814	0.4754630287873037	0.869993800051669	3074082446611060	2.67443e+16
141.01818*	0.06616972752189894	0.6378174274510431	5.29_141.0182m/z	-0.9742930566664816	0.33141939589177083	inf	0.0	0.3627043993662047
14103077	0.018385243456664608	0.8960395573680673	1.25_141.0308m/z	1.44548e+16	0.15032804951016954	1053237533462140	5526587697493500	582080959497031
14104061	0.28646305868333777	0.03756632318775945	1.81_141.0406m/z	-2660950698162330	0.008607081608314339	0.9907391975070452	6911374392741040	6847369519535000
14104405	0.009837717989969658	0.9442624849087352	4.54_141.0441m/z	0.4531166409351549	0.6510943556967383	1.00504e+16	7268304609596730	7.30491e+16
14105456	0.0929341801921314	0.5080528050180327	4.00_158.0579n	-2.30146e+16	0.02268925661231484	0.9905587694669664	7928995151933320	7854135680808610
141.05456*	0.057655478383838575	0.6817539585985747	1.29_141.0546m/z	0.8349196377597148	0.4050397657990957	1.00573e+16	4676402917550510	4703193696539760
141.05456**	0.003991533118881132	0.9773702569228344	4.18_141.0546m/z	-1693995033765550	0.09226182807395417	0.9913631936943876	5315440130151670	5269531703318470
14105457	0.16115310986028164	0.24899634846829125	4.31_141.0546m/z	-2282053958572050	0.02383795224645217	0.9845451657989372	5419728181710780	5.33597e+16
141.05457*	0.13998588877530596	0.3174338327804255	4.75_141.0546m/z	0.01716726326244827	0.9863251150821088	1.00067e+16	4.10375e+16	4106494207209090
14105458	0.02064308037239535	0.8833562672181638	3.03_141.0546m/z	0.4113205547300314	0.6814020182792893	1.00058e+16	5316834687376080	5319919459062500
141.05458*	0.08737022493550922	0.5338832672560403	2.28_141.0546m/z	-0.6502922328471991	0.5164600116858243	0.9985708400180836	4430771355196670	4424439074086800
14105459	0.12680173392809252	0.365583093398975	2.00_141.0546m/z	-0.6711742311741279	0.5031021276321532	0.9982258395294382	3.81326e+16	3806497769688270
14106577	0.029351879904499632	0.8347336308368468	0.98_141.0658m/z	-2.18813e+16	0.03014786275914328	0.927459908378765	8205332462959700	7610116894313910
14106579	0.13345428912622773	0.3407597416957269	1.17_141.0658m/z	-1.89717e+16	0.05965275242481189	0.9758448848184554	7613383094798770	7429480949222680
141.06579*	0.22711420261270115	0.10195681079629987	1.99_158.0691n	-1.24973e+16	0.21326904452813905	0.9917785274788032	4845985070403850	4806143937309390
1410658	0.16393508748859276	0.2408107421343704	2.97_158.0691n	-2.0517e+16	0.04187048032481472	0.9880821561299212	496776932825754	4908564229020800
14107295	0.19179518228805606	0.16888164115057547	5.93_141.0730m/z	-0.6950374555039028	0.4880657837962517	0.909864637140822	2.25501e+16	2.05176e+16
14107315	-0.13861505921932654	0.3222431215823427	10.96_141.0732m/z	1.19355e+16	0.23446721277030905	1006967788661110	2129169578545500	2144005182192490
14107318	0.12365688965261043	0.3776892739673156	9.48_141.0732m/z	1.08336e+16	0.2803223607613056	1.02328e+16	494241718143063	5057461215132120
14108477	0.08152404006442067	0.5616994870374827	3.24_141.0848m/z	-1.19228e+16	0.234963612861166	0.9930279266321208	6565229929483950	6519456664738590
14108825	0.035198064775588164	0.8024226101914791	1.64_141.0883m/z	-2.39238e+16	0.017929000000144912	0.9790390612470412	4788562872397290	4688190099314280
14109094	-0.0011289184578653706	0.9935989024597128	5.73_141.0909m/z	-1.10713e+16	0.26994315281627274	0.9957938676893744	836562139016921	8330434479741550
141.09094*	0.2288075802994992	0.09935941319658256	4.18_141.0909m/z	-1519144644434890	0.1307501977000816	0.9953444701932984	8125770768859370	808794100084253
141.09094**	-0.0044753553151091465	0.9746281064894482	5.23_141.0909m/z	-2.04769e+16	0.04226719773697205	0.993760160567674	7711037463840490	7662921828209480
14109095	0.2761415184971401	0.0453377385471944	4.82_141.0909m/z	-2.69174e+16	0.007883852189521227	0.9905181866873876	8580957955331060	8499594913955240
14110217	0.019171994144222628	0.8916169315948775	6.29_141.1022m/z	-0.985620775366394	0.32584544436976914	0.0	0.4069217647080613	0.0
141.10217*	0.200463663303808	0.1500786958515446	4.10_141.1022m/z	-1.23815e+16	0.21751966964653308	0.8915559787023037	2.13885e+16	1.90691e+16
14110219	0.4385848208806965	0.0010199577662782476	3.36_141.1022m/z	-0.960265570391064	0.33840755521342336	0.9934001391281282	4461642370722430	4432196151815610
1411022	0.20239895208872	0.14610110054674402	1.69_141.1022m/z	-1.16639e+16	0.2452349577396273	0.9914112266171556	45187451395887	4479934661609940
14110407	-0.08749118048456622	0.5333149713111087	3.24_140.0968n	-0.06377141622434936	0.9492338796284616	1.00025e+16	8793661235221610	8795828995631220
14110695	0.04249571623536074	0.7625507493814315	3.24_141.1069m/z	-0.8244089505576845	0.4109659561594308	1.001e+16	5789409190377670	5795191498880820
14110697	-0.0019756073012643987	0.9887983197657448	3.06_141.1070m/z	0.6412652149535883	0.52229139635969	1.0161e+16	1447017391734780	1.47031e+16
14110703	0.05668783399138254	0.6868177513234878	3.91_141.1070m/z	0.6964449357093646	0.48718662977480204	1.01704e+16	2231111438689560	2.26912e+16
14112505	-0.07350065531030607	0.6009451731606694	0.89_141.1251m/z	0.6256183157496223	0.5324795101865276	1.03457e+16	3.90193e+16	4036832987366920
14112733	-0.19223868596793167	0.1678798700052024	6.38_141.1273m/z	0.4294540911647493	0.6681853468456789	1.00528e+16	6.50648e+16	6540856028746340
141.12733*	0.26336054881345	0.05673297198955291	5.59_141.1273m/z	-0.848977460914199	0.39719473651101656	0.9946466269892329	6807921935907160	6771476590356060
141.12733**	-0.03922991641082164	0.7803251787151495	7.22_141.1273m/z	0.3941282038933768	0.6940246254499178	1005956684496830	6525838581318370	6564710942824570
141.12733***	-0.13442193351868378	0.33723846695629944	6.56_141.1273m/z	-0.8738313747493465	0.38355328426581625	0.9730593524701276	640649792892714	6233902726323050
14113856	0.08390283252920844	0.5502995038729819	5.45_141.1386m/z	-0.9682656902402949	0.3344104633744284	0.9061124477260644	2.80101e+16	2.53803e+16
141.13856*	0.07354245631330503	0.6007376281662751	4.86_141.1386m/z	-0.902259639215893	0.3683099415118571	1.0724e+16	1.76622e+16	1894089580257570
141.13856**	0.09067634327640066	0.5184574736012725	5.83_141.1386m/z	-0.7433351574656084	0.4583968032396327	1.04571e+16	1.84123e+16	1925400684334750
14115834	0.16619292440432348	0.2343040063405234	2.05_141.1583m/z	0.756243259015073	0.4506438567321307	1.00042e+16	1158088276569140	1.15857e+16
14149403	-0.03624707687810374	0.7966577430773796	0.71_141.4940m/z	0.7564580570556974	0.4505154806420886	0.9477726726319388	2.60974e+16	2.47344e+16
1415457	0.1350267112639688	0.33504923781635165	4.55_141.5457m/z	-1.11449e+16	0.2667816296763537	1007238750450730	5083763560799080	5120563656566240
14193523	-0.2945267619538047	0.03229062384497255	12.89_141.9352m/z	-0.4654421605610407	0.6422639601473961	0.9882891451988643	5216440712444580	5155351732682410
14194297	-0.1391391999319069	0.32039885729569084	2.05_141.9435n	1.27083e+16	0.20567991938916905	1.11865e+16	1.89027e+16	2.11455e+16
14195143	0.0565265599259732	0.6876630514344294	8.45_141.9514m/z	1.06076e+16	0.29043720212952184	1.08895e+16	5230796762264900	5696051137900760
14195629	0.002943845175002796	0.9833090667300814	0.55_141.9563m/z	0.2979153238190316	0.7661641886725822	1070177726432150	2.27084e+16	2430200058633280
14195857	-0.010644088317016355	0.9397019646107598	0.55_141.9591n	-0.3535832456333641	0.7241286216226839	0.9908003368982632	1.10521e+16	1.09505e+16
14196543	0.10069601807208077	0.473112378913221	0.67_141.9654m/z	1.17673e+16	0.2410965717948685	0.8061729641179491	1.51498e+16	1.22134e+16
14197116	0.22090515109444164	0.1119311323134918	1.93_141.9712m/z	2.55837e+16	0.011468493290931223	1221274682501210	2225427238704950	2.71786e+16
14198332	0.12115714163876565	0.3874809524792028	0.50_99.9495n	0.3500570897530305	0.7267680257702136	0.9962983023024826	8220802822861410	8190371895980280
14198333	-0.0729361960813734	0.603750825019616	12.99_140.9760n	-0.27854399274487385	0.7809636765980732	0.9974043252786394	1.05088e+16	1.04815e+16
14202468	-0.2601350675052633	0.05994707061874562	1.43_142.0247m/z	-0.9341623537587664	0.35166385108128584	1028266608045490	0.7514489171333116	0.7726898291401327
14202469	0.221671202905136	0.11066163763429143	1.80_142.0247m/z	-2.32294e+16	0.02147433149583121	0.9893483244274136	8410271149267310	8320687669507830
14202473	-0.1883315863154867	0.17685515238381214	2.12_142.0247m/z	-0.7568841877081095	0.4502608615137516	0.8658081184061304	0.4318599513249705	0.3739078518716358
14203465	0.09249067651225573	0.5100881555034484	0.69_142.0346m/z	-0.10501082758340076	0.91650211469855	0.9860644581875698	384914428110488	3.7955e+16
14204983	-0.18103013842198265	0.19454802630867216	1.08_142.0498m/z	-1.64964e+16	0.10102970149999532	0.9907434119902888	3.52329e+16	3.49068e+16
14204986	-0.01923193230006364	0.8912801286885912	2.85_142.0499m/z	-1.02196e+16	0.3083826654189601	0.9974393738489872	4037314613336070	40269765599573
1420611	0.1994557003949996	0.1521818242050269	2.19_142.0611m/z	-1.76342e+16	0.07978669415861282	0.9535194519524904	4669741432788560	4452689291752390
14206111	-0.2399951614366496	0.0834649550649607	1.05_142.0611m/z	0.7748027565368247	0.4396290172996259	1.22287e+16	0.6560943852181603	0.8023153615243186
14207008	-0.11970567505008163	0.39323468995850064	4.89_142.0701m/z	0.15708400273217954	0.8753817677990001	0.9903436810435198	4411745949550900	436914472350708
14207236	0.09499042452610047	0.4986704857210422	1.65_177.0862n	-2.17297e+16	0.0312916846732088	0.9574551093588322	4791962598743040	4588089074022950
14208622	0.12160064531864136	0.3857328503710173	1.73_159.0895n	-1.63782e+16	0.1034756980030272	0.9906222410729272	9074735234387660	8989634555032560
142.08622*	0.3697207949509089	0.006435854645707644	3.65_142.0862m/z	-2.39216e+16	0.01793946535523799	0.990012460147376	5927778710193690	58685747840881
14208623	0.026852131890654888	0.8486357544269458	1.30_141.0790n	-0.2284532010391313	0.8195931261465951	0.99080227697402	7223169319103810	7156732608336930
142.08623*	0.2679568596776162	0.05239472457185805	3.92_158.1055n	-1790202347525650	0.0753608817840474	0.9913747261380658	6882413616255810	6.82305e+16
14208626	0.19110976751006634	0.17043838068290382	4.59_142.0863m/z	-1.73682e+16	0.08439248299477055	0.9959261580781208	6535503402995670	6508878795251960
14212262	0.11172260881231937	0.4257668582755908	4.16_159.1259n	0.6942720189591267	0.4885442607061666	1.00233e+16	7536837080582650	755439192510936
14212263	0.05531700443540316	0.6940148157533115	5.03_142.1226m/z	-1.5958e+16	0.11255704623695056	0.9762001090386132	817011369062417	7975665875645180
142.12263*	0.13284951138094273	0.3429720971175618	4.73_141.1153n	0.07945360396587246	0.9367736642997068	0.997956772271991	773242421855084	7716625114982760
14213072	-0.10615865355569716	0.44931376582164906	5.34_142.1307m/z	0.17279063444192286	0.8630399797881905	1010184985694580	2.08141e+16	2102612990359230
14214706	-0.06076000414296835	0.6656022268212516	2.06_142.1471m/z	-0.8475052710167094	0.3980119349342265	0.9990334959935748	7076398315253490	7069558947930730
14215901	0.3348452783061394	0.014254450980726996	4.08_142.1590m/z	-5721270604107600	5.25372e+08	0.9245464896449076	5903102595754220	5457692782918310
142.15901*	0.2333232541309607	0.0926832283569574	4.19_142.1590m/z	-359865354076752	0.000429048792295213	0.9303476173109096	5176522052163430	4815964957187620
14215903	-0.10148170565882636	0.4696485637206144	6.89_142.1590m/z	-1071553019834570	0.28557580909222746	0.9735478543265114	4.74848e+16	4.62288e+16
14216465	0.05813930058006659	0.67922725124381	3.34_142.1647m/z	-0.24747463317009225	0.8048663342302185	1.00041e+16	6533086371231360	6535734525233580
14216825	0.12421531824615566	0.37552226661372734	2.05_142.1683m/z	-0.9211011849784098	0.3584198463823217	inf	0.0	0.05553322634514175
14218195	-0.1762322349760548	0.2068395249973353	2.06_142.1820m/z	-0.9015263739550616	0.3686982749878516	0.9963915911452241	6738251710479200	6713937343341400
14253821	0.05686681784539172	0.685880072017345	4.06_142.5382m/z	-2.56423e+16	0.011284449461141285	inf	0.0	0.004783851801879579
14290051	0.2855760513235865	0.03818777338792985	0.80_142.9005m/z	-0.7184469996691683	0.4735563804961349	0.9449005933281864	4.75365e+16	4491729684808020
14294798	-0.046245338256127866	0.7422924004956843	0.80_142.9480m/z	0.6018862717336018	0.5481235963483514	1.00428e+16	7713825245327400	7746814883046700
1429619	0.04426973095486346	0.7529455438158378	0.55_159.9652n	-0.8375119410220441	0.4035861277450053	0.9892212616006024	8493333438669600	840178601939533
14296637	-0.01894970268559729	0.8928661910979679	0.96_142.9664m/z	-1.65691e+16	0.09954780673647236	0.9978001270607364	7797634681886180	778048087635924
14297303	0.011557911290611345	0.9345360594439922	8.22_142.9730m/z	-0.5756617717991597	0.5656732914943947	0.7432009366655079	1.21245e+16	0.9010910079722768
14297315	-0.12365688965261043	0.3776892739673156	12.83_142.9732m/z	0.9954112894103688	0.321077761368184	1.00118e+16	2586850953875260	2589909687549700
14297317	-0.1015220241751787	0.4694711814765669	12.39_142.9732m/z	-0.5599422819947306	0.576321961305666	0.994773377372223	2939117839965080	2923756180157010
14297766	-0.026690857825245547	0.8495342836144741	0.69_142.9777m/z	0.7801745883531347	0.4364702538393911	1038434043561830	4479685063899840	4.65186e+16
1429789	-0.10502794019405268	0.4541850583851069	9.10_142.9789m/z	-0.444660151315152	0.6571816704642514	0.6980827834709654	1825500194563240	1.27435e+16
14298038	-0.019312569332768304	0.8908270452322374	12.16_142.9804m/z	-0.13152995746851887	0.895525569425024	0.9782770262046162	3.2615e+16	3190650434607440
142.98038*	-0.05148674538193137	0.7142648870757702	12.71_142.9804m/z	0.4421124140236935	0.6590201667247932	0.94714704157351	2.38679e+16	2260636701454530
142.98038**	0.10507005361418413	0.4540031107762326	13.00_142.9804m/z	-0.6601634812141991	0.5101224820425254	0.8662793967981594	1.76254e+16	1.52685e+16
14298182	-0.03189194643469672	0.8206584500165169	1.24_142.9818m/z	0.5566099775137496	0.5785915333154268	1006348010730800	8867930433449180	8924224151000710
14299112	-0.13635722230359584	0.3302642843673106	12.99_142.9911m/z	-0.37249100945869984	0.7100328714383674	0.9969487230886568	9321444334033420	9293002026156610
14299113	-0.07370224789206778	0.5999445412909339	1.10_142.9911m/z	-1483225112377050	0.14003210031946176	0.9966377723925256	5472779937363730	5454379205568690
14300144	0.04447132353662513	0.7518563569338712	8.57_143.0014m/z	-0.6068876269606481	0.5448077375532973	0.9888430921497868	4072565001086160	4027127768655040
14300151	0.18010281254587893	0.19688219101129173	1.93_143.0015m/z	2.67464e+16	0.008278512341794523	1.26753e+16	3.57593e+16	4532617892318070
14300154	0.11777038626516954	0.4009839478435142	0.71_143.0015m/z	-0.9038684612896466	0.3674588187479704	0.9989951075643536	3135939173837160	3132787892282730
14300211	0.024876524589390492	0.8596555455541675	0.98_143.0021m/z	-1.03931e+16	0.30026670483066403	1.00594e+16	7467161809551110	7.51152e+16
14303149	0.13409938538786512	0.33840969497889584	1.04_143.0315m/z	-3.13159e+16	0.0020764700339564587	0.9557556517410568	5703953163293110	5451585473083670
14303152	-0.24916843105742825	0.07198486547187985	1.59_120.0423n	-0.2819708458066749	0.7783395867837861	0.9683994322814276	3903741061834950	3780380628054660
1430338	-0.03939119047623097	0.7794447267775061	1.05_143.0338m/z	-0.2596643805712831	0.7954650402983098	0.9965801185209548	5.54387e+16	5524913754081100
14303383	0.005805866354736191	0.9670887873875142	1.73_143.0338m/z	0.5938068391148679	0.5535013776936475	1.00766e+16	6663266330240530	6714310783429690
143.03383*	-0.02709404298876889	0.84728831870881	2.50_143.0338m/z	0.036268936224100636	0.9711142875756128	0.9947367426969352	5.70476e+16	5674735015586900
14303384	0.051930249061807036	0.7119098058441562	2.33_143.0338m/z	-0.2656468384119309	0.7908619459255053	1.00154e+16	5763275436435200	5772159828413320
143.03384*	-0.029109968806385625	0.8360768805271442	1.95_143.0338m/z	0.5584165264604245	0.5773605993022008	1010733098327230	5472653138448640	5531391662694440
143.03384**	-0.038020360920251586	0.7869372111729407	0.88_143.0338m/z	-0.3646501679683883	0.7158664010770465	1.00232e+16	5498446667977240	5511176908110700
14303385	-0.12954339304005127	0.3552231590134685	3.65_160.0371n	0.6729940603120016	0.5019468036913874	1.01376e+16	538153874475505	5.4556e+16
143.03385*	-0.08825723229526057	0.5297226686938539	3.47_160.0371n	0.2307305148503721	0.8178264819663088	0.9971841116506496	5.84197e+16	5825524423996680
143.03385**	0.07575849222603684	0.5897801787502253	0.63_143.0338m/z	1.03439e+16	0.3025548369926681	1.01387e+16	5469626959411190	5545497632885230
14303386	-0.06426771506562146	0.6475326485737583	1.31_143.0339m/z	1.02861e+16	0.3052533594515845	1.00929e+16	5867512308066650	5921997626829120
[truncated: 15,974 more rows]

## Sheet: unannotated features - ion mode
t-test statistics of tumor vs. Control. Unannotated features in negative ion mode
feature	rho	p_rho	compound_ID	t_stat	p_ttest	FC	median_controls	median_UM
1000038	-0.2417095055322463	0.0812167520512126	1.32_100.0038m/z	0.021390537634419542	0.982961457115802	0.9958728168058468	4.67418e+16	4654889914833530
100.0038*	-0.2788428590927465	0.04318686036770111	4.17_100.0038m/z	-0.3916086291966237	0.695881819714667	1.00847e+16	4.26798e+16	4304135171207790
10000381	0.10462654993430844	0.4559212326525482	0.57_100.0038m/z	0.02216417146193129	0.9823453221169804	1.00049e+16	6238236906613170	6241294641210830
10004018	-0.03548315558875195	0.8008548412689812	2.28_100.0402m/z	-1.34163e+16	0.18166567772839332	0.6203937295321129	1.48417e+16	0.92076902100792
10004019	0.2284561997734049	0.09989412420674897	1.70_100.0402m/z	-2536071338550970	0.012193536738562105	0.6560486363369497	1.08252e+16	0.7101836612354904
10090032	-0.02040116927428134	0.8847138614436147	11.81_100.9003m/z	0.4148638847385169	0.6788115205633207	1006041596554570	2.67159e+16	2.68773e+16
10092302	-0.026676076483073283	0.8496166465186059	12.04_100.9230m/z	0.2607051884688924	0.7946636878020865	0.9333640181244324	1372747395328490	1.28127e+16
10092303	-0.017498236096913245	0.9010295192342884	12.24_100.9230m/z	0.5729976729959302	0.5674712690123056	0.9696550610778276	1.2667e+16	1228257442236730
10092305	-0.262271948871937	0.05780179903144825	11.39_100.9230m/z	1.41139e+16	0.16012133203188508	0.9944507730016384	1.6437e+16	1.63458e+16
100.92305*	-0.06176220418412345	0.6604196822285948	10.45_100.9230m/z	-1750207001675110	0.08204866065220133	0.8477062465190942	0.8727577276839071	0.7398421774554587
10093205	-0.12059268240983298	0.3897125739717091	11.23_100.9320m/z	-1.0903e+16	0.2772613668779064	0.9874819591077418	4.09265e+16	4041416994154800
10093206	0.031693688648649035	0.8217550954138806	10.44_100.9321m/z	-2.40102e+16	0.017526675286045373	0.23613860879508305	0.2835890966320179	0.06696633474813908
10093342	0.09361959497012108	0.5049154150154205	0.51_100.9334m/z	1.01411e+16	0.31210054519280256	0.996845682050604	7964231814048010	793911009468381
10093343	-0.161556295023805	0.24779847941404926	11.44_100.9334m/z	-0.3188509250410462	0.7502660773147694	1001262356530230	1.2604e+16	1.26199e+16
10094376	-0.06684810011217088	0.6343668351542908	12.29_100.9438m/z	-0.9491286286789854	0.34402323938867363	0.962368340958906	1.68372e+16	1.62036e+16
10094377	-0.011168229029596705	0.9367386458144312	11.84_100.9438m/z	-0.32909523611993546	0.7425251090637913	0.9468328700743248	1.49036e+16	1.41113e+16
100.94377*	-0.012095554905700398	0.9314979580694652	11.63_100.9438m/z	-0.18336324038951213	0.8547511221854218	0.9882934751628316	1.6149e+16	1.596e+16
10094589	-0.08115759730736602	0.563465400295722	1.07_100.9459m/z	0.8011371155143252	0.424270784659761	2.01982e+16	0.3117476052293787	0.6296741200160036
10095327	-0.08366092143109444	0.5514537563865558	9.00_100.9533m/z	0.5166727997504318	0.6061162706030858	1.00096e+16	8557162143649960	8565406454446530
100.95327*	-0.03814131646930859	0.78627532841575	0.55_100.9533m/z	-0.24824738696165896	0.8042694887835515	0.9997485594813332	5280087640013990	5278760012039180
10007968	-0.04108031762265479	0.7702398745520564	0.78_1000.7968m/z	0.6250798869312084	0.5328318948865478	1.18123e+16	0.5008000620228616	0.5915576205225455
100180338	-0.08825723229526057	0.5297226686938539	0.75_1001.8034m/z	0.509496858555729	0.6111239785044803	1.01341e+16	650948777750917	6596770295593170
100214972	-0.4571025350500917	0.0005799347076576376	0.77_1002.1497m/z	-1260092049795890	0.20951788292006826	0.9610354432336404	3562757693853160	3.42394e+16
100276846	0.16268521348167034	0.24446528848375254	0.78_967.7991n	0.7288622777078905	0.4671787120241007	0.9446579677937376	6965891732819580	6580385128196540
100370753	-0.2808991034267156	0.04160631253999431	0.70_1003.7075m/z	-0.8835924058352109	0.3782759579681185	0.8804832742138458	2702643351924370	2379632267534650
100397766	-0.10507005361418413	0.4540031107762326	5.83_1003.9777m/z	0.1902370174768955	0.8493707319173209	0.8105969646679113	1.02816e+16	0.8334219731542879
100481236	-0.3702449356634893	0.006355186927292264	0.77_1004.8124m/z	-0.3631135490624632	0.7170116126068773	1.00433e+16	8772522698547970	8810519835564040
1010242	0.44547928717694574	0.0008296509624511633	1.51_101.0242m/z	-1.58894e+16	0.1140976768252799	0.9969679727470546	7883591179037670	7859687915731750
10102421	-0.030601753911422013	0.827801039459203	0.81_101.0242m/z	-1.64133e+16	0.10274406998694892	0.9895166552695204	7.12479e+16	7050098824472830
10102422	0.18361052346853207	0.1881567966862814	0.58_64.0756n	-0.22281737263348256	0.8239691229744964	1001811901180710	6321535793824910	6332989791993670
10103543	-0.03459203980978632	0.8057578148709819	0.85_101.0354m/z	-0.5011961023979489	0.6169396112897267	0.5818848501619999	1.16846e+16	0.6799098895656048
1010606	0.16486241336469645	0.23812354894444146	4.26_102.0679n	-0.1740876052011299	0.8620223238658615	0.9517964140657288	2.42611e+16	2.30916e+16
101.0606*	0.1053926017450028	0.4526108909517738	4.08_102.0679n	-2155092128248420	0.032688527293779884	0.9881068925517954	5924846807166880	5854381967475090
10106061	0.30053422089030263	0.02877367489272507	4.85_101.0606m/z	-1.20756e+16	0.2290435526490792	1000450861159590	5103766263807000	5106067353783010
101.06061*	0.17832879782637626	0.20140284218369706	4.40_102.0679n	-1.69532e+16	0.09200985492505792	0.9855977046442151	4355694920342420	4292962915619960
10107182	-0.1263179117318645	0.3674301236638363	0.83_101.0718m/z	-1.29853e+16	0.1960206124232745	1.01185e+16	383915728259188	3884634503827910
10192465	-0.06487249281090647	0.6444371046978192	0.55_64.9760n	1.64328e+16	0.10233848329227782	1.00782e+16	3450909886913460	3477891095883640
10192473	-0.3559721808747628	0.00889603144431575	9.56_101.9247m/z	0.7086109979936426	0.4796234576458023	1.02047e+16	3.41711e+16	3487065307187010
10193764	0.1070053423990962	0.4456850055388277	11.42_101.9376m/z	-0.8821415187304861	0.3790575147922808	0.99180058244229	2720186297205120	2697882353919570
101.93764*	-0.1925194091159363	0.16724802354538693	10.84_101.9376m/z	-2.33515e+16	0.0208094220922231	0.7886573907720283	1324911796283830	1044901480260280
10194084	-0.11704465297082756	0.4039127004304521	0.54_101.9408m/z	-0.26388987010323584	0.792213057770112	1000067283744140	5258490234563470	5258844045475030
10197501	0.14712226616966922	0.2931391248637183	0.66_101.9750m/z	0.21879942455328366	0.8270922857048526	0.9884738296525504	3786626021639410	3.74298e+16
1019807	-0.01947384339817764	0.8899209822179475	10.74_101.9807m/z	-0.029456306846689824	0.9765383164045668	0.974948400457476	3353001146857730	3.269e+16
101.9807*	0.18159459765091526	0.1931369121009772	10.90_101.9807m/z	-2.99786e+16	0.003164670563532433	0.9728757063657282	4971728992756700	4836874355687140
101079427	-0.2634485327476342	0.056647287774877784	0.73_1010.7943m/z	0.6211388985339898	0.5354147692928897	452752588266999	0.8995211916087851	4072605477018920
101380157	-0.1545811916948511	0.2690761909340573	0.77_1013.8016m/z	-0.5995806089277157	0.5496556159440302	1.00183e+16	6294985985044920	6306532110616840
101672718	0.11070052160299647	0.4300391910651575	11.28_1016.7272m/z	-143104178034977	0.15441843049388812	0.636742958445825	2149637121682200	1.36877e+16
101713143	0.03600443510263485	0.7979902412452483	10.36_1017.1314m/z	-0.09080058710412456	0.9277675277111084	1002289669854990	3701394261950290	3.70987e+16
101948734	-0.008708799532104287	0.9506501599285028	0.77_1019.4873m/z	-0.9826458558550679	0.3273032995588511	1.01417e+16	7.4716e+16	7577476367675670
10201945	-0.22453381756615176	0.10601518444948436	1.09_65.0708n	-1.25695e+16	0.21064976482681333	0.9836357264869234	5596496056277310	5.50491e+16
10201947	0.26396532655873506	0.05614610885297717	3.10_102.0195m/z	-2.29113e+16	0.02329457022016055	0.9590544012266071	4481552494977330	4298052644636090
10202756	0.21046265535918696	0.13036730360793702	0.94_102.0276m/z	-0.4648725377549983	0.6426709453150554	1.014e+16	3373378084980790	3.42061e+16
10202757	0.231791150509572	0.09490801902991704	1.95_102.0276m/z	1.23819e+16	0.21750746505361213	1.13192e+16	2.47041e+16	2796312193163710
10202758	0.1674246006954272	0.2308059189211077	2.25_102.0276m/z	0.1384857097541358	0.8900351664991917	0.9036710718576432	0.3764580367559967	0.3401942375847156
102.02758*	0.2802798146137647	0.04207725231248916	3.28_102.0276m/z	-0.8692305091192812	0.3860564601047516	0.7404865323491936	0.4110258326160903	0.3043590934998288
10205577	0.14358339607491635	0.3050310426781466	1.85_102.0558m/z	-2840812308690720	0.005100861133861103	0.26289515268682273	1.37707e+16	0.3620250607564063
10205585	-0.11404322241347767	0.4161564336761119	1.35_102.0559m/z	-2031427620570460	0.043909079748935334	0.8185171498142533	2.07504e+16	1.69845e+16
10205586	0.13813123702309854	0.32395147188385603	0.85_102.0559m/z	-1.09452e+16	0.2754158499996735	0.958874242301092	7159927894929550	6865470435181020
102.05586*	0.1573631693231622	0.2604483374918826	2.21_102.0559m/z	-1.34554e+16	0.1804042572781047	0.8697501108591662	1.66239e+16	1.44586e+16
102.05586**	0.18316701978865635	0.18924445409619065	3.24_65.1073n	-3.42046e+16	0.0007980800222079566	0.7368327768565692	1.25775e+16	0.9267486210118422
10205587	-0.19128550368562125	0.1700382513967482	1.13_102.0559m/z	-1.76806e+16	0.07900565979072229	0.747075137083178	1.05975e+16	0.7917111421944706
10292318	-0.02189295437931772	0.8763474084396771	10.06_102.9232m/z	0.05899107510027131	0.9530347161011924	0.9987831169610492	2023428508048960	2020966232216980
10293335	-0.01830460642395994	0.8964930283516861	0.55_102.9334m/z	1.06188e+16	0.2899299723961516	1.00057e+16	5461896140074480	5.46498e+16
10293771	-0.18078822732386865	0.19515503073416846	11.23_102.9377m/z	-0.34759479920320724	0.7286130492526509	1.00248e+16	7272008199109190	72900244446065
10294862	-0.01806269532584593	0.8978536375913883	0.55_57.9504n	-0.45697628007376795	0.648323791257768	0.9965287215201336	7.61712e+16	759067794268368
10294863	-0.12591472656834116	0.3689736160547595	9.00_102.9486m/z	0.4614255738353768	0.6451360459273767	1.00156e+16	1.11343e+16	1.11517e+16
10295523	0.08971931455801781	0.5228997109534174	0.79_102.9552m/z	-0.04514284454449386	0.9640511856006558	0.2682958988422848	0.16289458959531206	0.04370395033201933
10295665	0.43652857654672733	0.0010838516804611963	0.79_66.0080n	0.4159142420391256	0.6780443473290892	1.01739e+16	9695323432839410	9863951204506470
10298854	0.14244531827279838	0.30892047751006546	0.70_102.9885m/z	-1.2305e+16	0.2203608978700876	0.9928718673547994	5172941696626500	5.13607e+16
102032274	0.2034538135613171	0.14396628066780295	0.75_1020.3227m/z	0.39868872106449454	0.6906677597685758	0.8309165436718187	0.3376281296755822	0.2805407985564153
102078721	-0.11587541599660985	0.4086572863373299	0.77_1020.7872m/z	1605474167560160	0.110411923803478	0.9297412262241316	6895826624097590	6411334301317510
10212881	-0.3419204150995009	0.012214263561675126	0.77_1021.2881m/z	2.52762e+16	0.012478892367434843	0.4761523978937378	0.3217899849963097	0.15322107297418278
102283156	0.26296152342313106	0.05712288187802279	0.76_1022.8316m/z	-4129345443748630	5.91072e+10	0.9034210357598191	6752725650013320	610055440093694
102419784	-0.024811151059554924	0.8600206599708913	3.69_1024.1978m/z	1.71915e+16	0.08757089440978108	1987918528135820	0.042157868791130364	0.08380640847660703
102480397	-0.009031347662922969	0.9488247784356854	0.75_1024.8040m/z	-0.4250351063256749	0.6713967728946795	1.00057e+16	7.51099e+16	7515285901109420
102514626	-0.10942284232362087	0.43541370962340187	0.77_1025.1463m/z	-0.4606579973287212	0.6456855169245805	0.7050082639188769	3.1865e+16	2.24651e+16
102563669	0.22580720213988395	0.10399717203206812	9.04_1025.6367m/z	-2386723201221130	0.01819727419966326	0.3099942598154343	0.9356667158294244	0.2900513110074807
102580398	0.2590867860801025	0.06102264160453496	0.77_1025.8040m/z	1.06896e+16	0.28673732052625	0.9500409446621172	7250325976525820	6888106539846880
10268031	0.08612035092858683	0.5397729794445805	0.78_1026.8031m/z	1057607619543220	0.2918693290172328	1.15671e+16	3.55793e+16	4.11548e+16
102780999	0.22461445459885646	0.10588650701760867	0.75_1027.8100m/z	0.4801030085512799	0.6318266507487094	1.02581e+16	7988279415220980	8194436086182970
102877317	-0.02233645805919341	0.8738626254245876	0.77_1028.7732m/z	-0.2221235257718448	0.8245082526452738	1.00938e+16	5654284982115400	5707304445280870
1030035	0.14490474777029078	0.3005549898093036	1.26_103.0035m/z	-0.2547321231489165	0.7992654979136722	1.00508e+16	7341214339359910	7378522462474860
103.0035*	-0.2268319729982348	0.10239476180886888	0.86_103.0035m/z	-1.91186e+16	0.05772707063600424	0.9629312041385976	4094898755159410	3.94311e+16
10300586	0.04027819783598234	0.7746071749049066	2.10_103.0059m/z	2522441614196030	0.01265658581573773	1.23581e+16	1.64894e+16	2037774812713740
103.01473*	-0.03994469541783428	0.7764250421291868	1.32_103.0147m/z	-1.16288e+16	0.2466530289967992	0.7361480814580058	0.6202434918457148	0.4565910565590373
10302911	0.10422336477078513	0.4576688108949341	2.09_103.0291m/z	2.21862e+16	0.02795628867914168	1.23859e+16	1.63672e+16	2.02723e+16
10303984	0.1153915938003818	0.4106299403482574	2.10_103.0398m/z	1.95501e+16	0.052369427410263236	1.03411e+16	9073113152480790	938260428835304
10303985	0.2081644999271039	0.13471530913327134	1.93_103.0398m/z	3175473194860530	0.001802983277242893	1.08966e+16	874080983254071	9524547859782020
10305052	0.1556003644897026	0.265893566062264	1.93_103.0505m/z	2.99131e+16	0.003229582463306119	1653324958791610	1.61345e+16	2667555066217180
10305056	0.012982562265451759	0.9264878181928204	2.10_103.0506m/z	2.17654e+16	0.03101859720410172	1.21873e+16	1.77833e+16	2.16731e+16
10307373	0.1595806877225406	0.2537055330832326	2.10_103.0737m/z	2470273804809420	0.014577445627284129	1283883834774740	1.53888e+16	1975744503707890
10392005	-0.2975909691965822	0.030454538603935107	1.15_103.9200m/z	-2.09111e+16	0.03813948311551355	0.9888925164074582	5759977082944770	569599823200255
10392006	0.10656183871922052	0.4475837606214331	6.86_103.9201m/z	0.5053582275515546	0.6140205008069854	1005021157144370	4907358966051560	4931999586583980
10392009	-0.03330309450702843	0.8128627518973774	9.24_103.9201m/z	0.679692475328948	0.4977065351946906	1.00421e+16	7.69049e+16	7722902360334290
10397211	-0.08575748428141583	0.5414887865471774	0.62_103.9721m/z	-0.1607677641757287	0.8724843171647713	100476039339511	1.48411e+16	1.49117e+16
103081875	-0.10172361675694036	0.4685848095619121	0.77_1030.8188m/z	-0.35581224243113896	0.7224618733908588	1007779154335740	9366406230217150	9439268949853260
103379037	0.09700830586064248	0.4895508729994531	0.78_1033.7904m/z	-1.14545e+16	0.2537750112037413	0.8027211867987791	6211661809272860	4986232539532160
103579614	-0.24570103865112744	0.07616694119062746	0.76_1035.7961m/z	0.6913764387585237	0.4903566047892003	0.9587229617139914	6936810266703370	6650479283741880
103675965	-0.1405614889489384	0.3154281342010668	0.77_1036.7597m/z	2.40017e+16	0.017565632082974045	0.0	0.015065911474708328	0.0
10368243	0.07974675982089116	0.5702884564888174	0.77_1036.8243m/z	-1.8746e+16	0.06271758775572997	0.6405078531018321	5037214143411290	3.22638e+16
103880539	-0.3491583516112182	0.010392035276712857	0.77_1038.8054m/z	-0.3547067629219655	0.7232883379344899	1.00321e+16	8722181933729900	8750177876669670
10403515	-0.23203306160768605	0.09455400291291302	0.80_104.0351m/z	-0.9103742239193204	0.3640296755731604	0.994259956926826	6125390101239990	6090230098218880
10492052	0.07729059584742555	0.5822571850239788	0.56_104.9205m/z	-0.7257287593702142	0.4690924106652957	0.9319503782629928	1498829025758200	1.39683e+16
10492794	-0.16764439099300754	0.2301854984470456	9.24_104.9279m/z	0.5397405753842875	0.5901455545397525	1013960643352420	5835666911886030	5917136576366430
10492796	0.10680374981733452	0.4465475234884776	10.46_104.9280m/z	-0.2201939861174268	0.8260079733480826	1012688612158850	4.08911e+16	4140994474754700
10492799	0.012861606716394759	0.9271708569094096	10.84_104.9280m/z	-0.1265951312521643	0.8994238712828551	0.9956433158367148	4126112809405400	4.10814e+16
104928	0.023626650582468114	0.8666411100774105	0.53_104.9280m/z	0.3583005057699171	0.7206028266809872	1.00014e+16	4448448774509510	4449056104481400
10495227	-0.09720794292547888	0.4886533938504297	0.79_104.9523m/z	0.7753649137842059	0.4392978362113368	0.7769808985446612	0.3878513670522948	0.3013531036740672
10495372	0.4258844882297111	0.0014755929128628595	0.79_104.9537m/z	0.4925747805990973	0.6230056238926821	1.02028e+16	8601479965951040	8775938788504170
104214919	0.18679568626036647	0.18047669738155844	0.77_1042.1492m/z	0.049940095397156825	0.9602340098588216	1.0411e+16	7662996149477830	7977935136465640
104277436	-0.06434835209832612	0.6471195660413499	10.00_997.7762n	0.4789136834047806	0.6326706330092176	1.0079e+16	6584775147456420	6636777594513270
104474966	0.2644894672713154	0.055641469867362035	0.78_1044.7497m/z	2095869367996170	0.03770832468668885	2247518005945580	1.83298e+16	4119662739211350
104679202	-0.2745105946002538	0.04667819406971992	0.77_1046.7920m/z	-0.16344920751108438	0.8703763199416321	1.02815e+16	5416596872738430	5569047308735650
104747404	-0.14611430326086086	0.2964950694714284	0.77_1047.4740m/z	0.0808183239041969	0.9356900263544502	0.9998623595738256	7.36276e+16	7361745050444550
1050177	-0.2269733907978252	0.10217513496698367	0.92_105.0177m/z	0.7420199040670341	0.45919099694762894	2.61072e+16	0.013809229371277626	0.3605199922436463
10501911	-0.11764943071611254	0.4014712120447188	1.92_105.0191m/z	-0.5444909244938111	0.5868811545507654	0.8173110370999642	1.00182e+16	0.8187949233031101
10501916	-0.026852131890654888	0.8486357544269458	0.92_105.0192m/z	0.14848712708523235	0.8821501104917525	1.00691e+16	80226710622417	8078097546859220
10596019	0.2054228408151451	0.14004359816300765	1.87_105.9602m/z	1.90176e+16	0.059046124653538576	1227957103850420	0.8162656793014857	1.00234e+16
1059603	0.08462856582355048	0.5468436883507688	1.24_105.9603m/z	1.3612e+16	0.17541250673655304	1.07418e+16	5507755650066660	5916334954123980
10604096	-0.05588146366433585	0.6910480315672791	12.42_106.0410m/z	-0.8230732432022828	0.4117227669468412	0.9895816034999424	863527112090545	8545305442482360
10604098	-0.08773309158268022	0.5321792703297181	0.54_106.0410m/z	-0.5677456009107665	0.5710239191955451	0.9661444007288325	5659942987496810	5.46832e+16
10696367	0.0422194862597631	0.7640496045592651	1.24_106.9637m/z	1.79969e+16	0.0738414877723239	1.63309e+16	0.016150325799650575	0.026374888772069952
10702497	0.12809192645136722	0.3606852391956084	12.08_107.0250m/z	-0.3920895056851075	0.6955272200092844	0.9959976125945036	5732072654269840	5709130678871000
10703621	-0.060356818979445	0.6676915614479654	8.51_107.0362m/z	-2191750375661840	0.02987987857874956	0.8668224249962682	1389839809778740	1.20474e+16
10703627	0.0624533818297664	0.6568546535067965	0.53_126.0541n	0.18802095375873185	0.8511045759850271	1.00238e+16	6010281385808890	6024599376901330
10703742	0.05910053049898634	0.674217719808307	4.11_107.0374m/z	1.79251e+16	0.07498939145398305	4057167138735730	0.026113774931081392	1.05948e+16
10703751	-0.06077905187711322	0.6655035822133104	3.69_107.0375m/z	1.26838e+16	0.2065514829575613	1.76997e+16	0.3303858517676069	0.5847719940361359
10705002	0.2164297957793325	0.1195715450240759	5.10_107.0500m/z	-4.57813e+16	9.52848e+09	0.9081940819962808	7641330867470330	6939811472412060
10705013	-0.01935288784912064	0.8906005164647635	5.89_107.0501m/z	-1.89744e+16	0.05961810416861987	0.8369479815279225	3.3055e+16	2766534289295390
10795614	0.15062689177622002	0.2816639263656836	1.24_107.9561m/z	1.2322e+16	0.2197270684314902	inf	0.0	0.417215340227723
10802011	0.20868864063968426	0.13371421323070878	3.79_108.0201m/z	-0.4806847788110606	0.6314139846852561	0.9237594945082416	1.11037e+16	1.02572e+16
10802021	-0.08132244748265903	0.5626706545148744	1.11_108.0202m/z	-2.04949e+16	0.042088772127192746	0.9836479102946516	2818546296886820	2772457175001450
108.02022*	0.008426569917637943	0.9522475751833016	1.37_108.0202m/z	-1.89525e+16	0.0599086764737562	0.9768662951777404	3803200589814620	3715218469990010
10802145	0.2765393963717813	0.04501554493127362	4.33_108.0215m/z	-3.16426e+16	0.0018694909213460005	0.26343529699315205	1.52273e+16	0.4011399379256337
10802158	0.03072270946047902	0.8271308249371404	6.56_108.0216m/z	0.09150089860785658	0.9272119821811052	0.9894556940925591	2184515284702950	2.16148e+16
108.02158*	0.07970970682856564	0.5704681648568855	3.89_108.0216m/z	0.8286972261271518	0.4085418655953357	0.9626783297234998	0.7359373579890494	0.7084709465700233
10803144	0.2061082555931348	0.13869701140269552	1.12_108.0314m/z	0.2578994046095762	0.7968244514091958	1.01207e+16	3.21502e+16	325381435814988
10803155	-0.023142828386240096	0.8693479453475886	0.53_127.0494n	0.3021197094601308	0.7629632217940384	1.00502e+16	4679346740583910	4702842275081200
10804532	0.22275980284664898	0.10887663228776692	2.13_108.0453m/z	-3.87695e+16	0.0001554970031322453	0.7456570333022225	4224813856559450	3.15026e+16
10804534	0.23142828386240094	0.09544097389825797	2.36_108.0453m/z	-1.93241e+16	0.055121022016783545	0.95136070110618	3835467412302120	3.64891e+16
10804535	0.17431100182974402	0.2119115716736972	3.58_108.0453m/z	-1.95631e+16	0.05221393954097616	0.8903718518609469	1.32743e+16	1.18191e+16
10804538	0.09361702677861453	0.5049271520331169	0.56_108.0454m/z	132760159441781	0.18624921846957088	0.9396208721998828	0.7900009218590718	0.7423013552359325
108.04538*	-0.007983066237762262	0.9547581729143382	3.96_108.0454m/z	-2.17812e+16	0.030898929224257236	0.7843236731246518	1.59346e+16	1.24979e+16
108.04538**	0.06213083369894772	0.6585173892662359	4.06_108.0454m/z	0.6765029777610866	0.4997231647301076	1.00611e+16	1.30073e+16	1.30868e+16
10804539	0.2923495620707787	0.033650372767681604	4.69_108.0454m/z	1.05666e+16	0.292300185183686	1021391376537250	3739642880138000	3.81964e+16
10890185	0.1743372647074951	0.21184165522805365	0.81_108.9019m/z	-0.25547703380132203	0.7986912108252138	0.9955067787253756	6.76453e+16	6734133612720170
10893554	-0.19469811546542407	0.16240306817094494	9.11_108.9355m/z	0.4068658567529892	0.6846641953412994	0.9991582790374844	5418008210850040	5413447759763880
10893555	0.054268723010242464	0.6995366164150595	11.93_108.9356m/z	0.2990936817856165	0.7652666484149755	1.00014e+16	8374490729985830	8375625156309500
108.93555*	-0.2779155332166429	0.04391558815065754	0.75_108.9355m/z	-3.50655e+16	0.0005930298603646777	0.8584312373001376	2.39802e+16	2.05853e+16
10899641	0.2967845988695355	0.03092907103027777	0.92_108.9964m/z	0.8879232237752083	0.3759490188368314	1.10055e+16	2610598765338880	2.87311e+16
10902937	0.2535631493398327	0.0669488298181217	4.32_109.0294m/z	-4794802357982960	3.77033e+10	0.8814289256925659	5313572645786940	4.68354e+16
1090294	0.3381110781306785	0.013279107021792656	4.00_109.0294m/z	-1.16688e+16	0.24504139015759874	0.9643931936542968	4652663565503050	4486997074934480
10902941	0.1945368414000148	0.16275814475734454	1.64_109.0294m/z	0.4491799827119676	0.6539252276577309	1.0639e+16	1.67805e+16	1.78527e+16
1090407	-0.01923193230006364	0.8912801286885912	0.53_110.0480n	-0.4843037224177979	0.6288495741193137	1.00011e+16	5.40097e+16	5401566821031950
10906579	0.09434532826446312	0.5016043036374842	4.09_109.0658m/z	0.5184097816340428	0.6049069150060241	0.968771420302854	2.14401e+16	2.07705e+16
11002463	-0.051688337963693036	0.7131940666943828	2.34_110.0246m/z	2211191681268990	0.02847716383490455	1003118393448130	7888537261673890	7.91314e+16
11002465	0.12466485256141878	0.3737832535656023	0.92_110.0246m/z	-0.1100427588637318	0.9125169005077879	0.9876186413641366	2.18034e+16	2.15334e+16
11002467	0.4371736728083648	0.0010634304055044642	1.57_110.0247m/z	-1.8068e+16	0.0727204658789509	0.9642647175180596	403973299930453	3.89537e+16
11002468	0.12071363795889	0.389233732062345	4.42_110.0247m/z	-2292092155725100	0.023237415019633872	0.9831846128531464	4563628866812850	448688968062284
110.89894*	0.07624231442226488	0.5873998041113245	0.81_110.8989m/z	-0.0973730704359706	0.9225551213187424	0.995119973502302	6412156235833500	6380864743495250
11093377	0.09168430618520904	0.5137993667390728	11.98_110.9338m/z	-0.19257093927693586	0.8475454710744026	1.00063e+16	823164799996241	8236845946302070
11093384	0.18740046400565152	0.17904434830965532	0.54_110.9338m/z	-0.7062551294329068	0.4810829427923049	0.9989531986771436	2.96797e+16	2.96486e+16
11094294	-0.08382219549650377	0.5506841264287601	0.72_110.9429m/z	-2.39029e+16	0.018027827362566258	0.9529516677260834	3980057113382180	3.7928e+16
11097053	0.2783187183801661	0.04359752195098565	1.84_110.9705m/z	1.59423e+16	0.11290924410221853	1.1789e+16	1909151669096220	2250701761277740
11097065	0.4204414885221459	0.0017212168984861971	3.64_110.9707m/z	5122152068029140	8.80378e+07	1.38485e+16	0.8480542556660352	1.17443e+16
11097407	0.23701973796675124	0.08748272775260679	0.91_110.9741m/z	-1.1129e+16	0.26746360341758235	0.3916844651330354	0.06833337231963765	0.02676512038775384
11097566	0.2393869254334671	0.08427424964367866	1.22_110.9757m/z	1.38792e+16	0.1671396312474238	1.11862e+16	0.06080127580232906	0.06801378947540458
110.97566*	0.32077411609917456	0.01918879748420952	0.91_110.9757m/z	-0.6111457943571286	0.5419925565448054	1.00841e+16	832934413708019	8399411493020040
11100695	0.05130584147453584	0.7152262783070225	1.84_111.0070m/z	0.8335048000492212	0.4058344695889661	1.49447e+16	0.3046970049888573	0.4553597976481973
1110071	0.3592379806993019	0.008247769002150749	3.64_111.0071m/z	1.30553e+16	0.19363290252622506	1.03169e+16	0.3137905845777664	0.3237339532387065
11100848	0.2494909791882469	0.0716053011349412	1.84_130.0263n	1.37704e+16	0.17047295136479296	1.02764e+16	9871871178291630	1.01447e+16
11101364	0.3749218835603601	0.0056735890570813255	0.95_111.0136m/z	1449046646416410	0.1493317401791504	1.262e+16	0.8629925876571727	108909282767156
1110199	0.06100191524108235	0.6643498327327773	2.35_111.0199m/z	0.7499876915337175	0.4543917185724452	1.00367e+16	8538492711985930	856986205572122
11101994	0.10341699444373842	0.4611748854609389	1.44_112.0272n	-0.17777747220586354	0.8591283743991556	1.00432e+16	7.20476e+16	7235891510318640
1110451	0.17216006482446897	0.21769276863932854	0.56_111.0451m/z	0.4827794251816623	0.6299291539853049	1.02675e+16	2.44036e+16	2.50563e+16
111.0451*	0.3146860201299721	0.02173510041427293	3.82_111.0451m/z	-3.50495e+16	0.0005963338605801219	0.8460365103079741	3.79074e+16	3.20711e+16
11105629	0.03475456109571248	0.8048630542640711	1.19_111.0563m/z	-0.9542730166952204	0.34142181224690404	0.8560667395410386	1.80764e+16	1.54746e+16
11108147	0.1081745793733139	0.4407006031138149	4.48_111.0815m/z	-2.75889e+16	0.006493654464029935	0.9462275237278416	4203629876927710	3.97759e+16
111.08147*	-0.003668984988062454	0.9791985033195816	4.20_111.0815m/z	0.007295270751479486	0.9941885886241948	0.9771553832670938	1.72981e+16	1.69029e+16
11108148	-0.20614857410948714	0.13861810282815684	7.61_111.0815m/z	-0.05066294253301211	0.9596589175177952	0.9935034236413564	1.02072e+16	1.01409e+16
111.08148*	-0.14163894794575166	0.3116954523497166	4.95_130.0993n	-0.5782320572217773	0.5639412503614574	0.9735639882062862	4662618488263890	4.53936e+16
11108149	0.3511742774288349	0.009928336148456236	7.84_111.0815m/z	-0.493686722230734	0.6222217909372174	0.9354010015752059	1.94959e+16	1.82365e+16
11197905	0.18385243456664604	0.1875654185942041	0.91_111.9790m/z	-0.6329188072203097	0.5277133534088534	1.06253e+16	3.22382e+16	3.42541e+16
11200399	0.13486543719855945	0.33563216180348304	0.54_112.0040m/z	0.29507781912383085	0.7683267783152117	0.9973533849634528	5046455834189560	503309980829753
11200613	-0.022713130883887062	0.8717532168828569	1.43_112.0061m/z	-0.002145408840352883	0.9982909537643828	0.33191860271968376	0.7081337620419654	0.2350427688356022
11201206	0.4496724128775885	0.0007301707018671399	0.83_112.0121m/z	0.5758511024214565	0.5655456190872399	1.29318e+16	0.9506431825885616	1.22936e+16
11201207	0.2115512553007	0.12834497648724766	7.51_112.0121m/z	-2296003222194880	0.023007049394106232	0.8669283138985343	2540401955855900	2.20235e+16
11201517	0.1645801837502301	0.238939206576592	1.09_112.0152m/z	-1.93082e+16	0.055318932697684065	0.9852855107677166	4.21235e+16	4150362885094350
11201649	0.2444284212348616	0.07774923690432384	3.52_112.0165m/z	-2.34537e+16	0.02026723885830675	0.40595971157031946	2.28071e+16	0.9258771330758208
11201696	-0.262030037773823	0.05804150738883195	2.27_112.0170m/z	1092016545157610	0.2765094463326359	0.8432521703148154	0.34518217588046	0.2910756189651882
11202329	0.02079299188384497	0.8825151370686888	1.06_112.0233m/z	-1.55151e+16	0.12280570224551415	0.9462269390627992	0.5717254433327804	0.5409820162290987
11202331	0.10728757201356257	0.44447902912718507	0.56_112.0233m/z	0.1535445330691243	0.8781673164240982	0.9507257387004138	1272287813775540	1.2096e+16
11202335	0.18602963444967216	0.1823028361991557	1.44_112.0233m/z	-0.02533150096999504	0.979822922460024	1.00131e+16	4.38036e+16	438610905288767
11204032	0.4655982268367607	0.0004427726938278576	1.14_112.0403m/z	-0.23127555096528685	0.817403804034527	1.00405e+16	5530678713220830	5553099493733940
11204036	0.2707791558222796	0.04986698647106249	0.56_112.0404m/z	0.4524737453481824	0.6515563198385945	1.01426e+16	4411071309684730	4473972248079380
112.04036*	0.07471021080087614	0.5949523946810155	3.71_112.0404m/z	-3945510056921060	0.00012008668508607285	0.9532836308367112	4788772908920730	4565058825868430
11205156	-0.024755569040333485	0.860331111155995	0.91_112.0516m/z	-1.44507e+16	0.15044343477072514	0.9842602120541902	5409671913689110	5324524824911240
1120516	0.19078721937924764	0.17117456265455713	1.39_112.0516m/z	-1.0622e+16	0.2897852918566231	0.916247651097613	0.950731296424866	0.8711053171742718
11289602	0.060639048593911324	0.666228763680941	0.81_112.8960m/z	-0.8798757023417318	0.3802800586178437	0.9542846973473554	397112916229693	3.78959e+16
11294634	-0.08317709923486641	0.5537657190810734	10.34_112.9463m/z	-0.5107641003986106	0.6102382924444154	0.9841951954492556	3663442517397520	3605542524427170
11294635	0.10119947604436	0.4708912452475892	11.69_112.9463m/z	-0.6001469965934423	0.5492790768974275	0.9945689345841892	4825634170002570	4799425835152510
112.94635*	-0.34234452234767365	0.012100382371024532	10.42_112.9463m/z	1.23442e+16	0.21890371063125375	1017020656749230	269695585808343	2.74286e+16
112.94635**	0.3310150192526676	0.015475895843544347	10.61_112.9464m/z	0.03609036340444933	0.9712564462541179	1000289288694390	4225193440107130	4226415740800980
11294637	-0.12212478603122168	0.3836729489225668	12.82_112.9464m/z	-1.05056e+16	0.2950871669305523	0.9857789734606726	4.00434e+16	3947396043072830
11294653	-0.05471222669011814	0.6971985684288132	0.77_112.9465m/z	-0.5222913378629478	0.6022083781567802	1.00201e+16	6490278752677510	6.5033e+16
11297149	0.3108960795928526	0.02345996407252236	0.91_112.9715m/z	-0.4168595944835701	0.6773541568662638	1.02126e+16	5230870228234830	5342066822953890
11297319	0.08325773626757109	0.5533800723629818	0.77_112.9732m/z	-0.17743275596223146	0.8593986538429669	1.00376e+16	5868340910504240	5890417037221790
11297496	0.16252393941626106	0.2449395795101195	1.44_112.9750m/z	-0.513975252205637	0.6079965717530116	1.00107e+16	4.93995e+16	4945262411639430
11298393	0.16776743429450033	0.229838676602298	0.78_112.9839m/z	0.2665884712992775	0.7901380892992673	1077533367460180	2.70871e+16	2.91873e+16
11298555	0.03229513159822007	0.8184293180596821	0.78_76.0369n	-0.4315127051723783	0.6666913689375706	1.00063e+16	1.25692e+16	1.25771e+16
11298785	-0.17412524972136098	0.2124065386743172	1.01_112.9878m/z	-2.04011e+16	0.043026060713768036	0.9132575740752416	5507694247629300	5029943487338090
11298789	-0.3003165259375279	0.028895285730221706	1.61_112.9879m/z	-0.4847824742561602	0.6285106643961851	0.5645607802762117	0.19765758357036733	0.1115897196079971
11298814	0.06575950017065785	0.6399077859369454	0.76_112.9881m/z	0.4256117469738441	0.670977363178717	1.32683e+16	0.2878876256676586	0.38197750270892267
11299758	0.09769964317221136	0.48644660345503005	11.05_112.9976m/z	-0.1405977011613285	0.8883691433045959	0.9215151783225792	0.9087892036371196	0.8374630450472952
11300165	-0.07765346249459656	0.5804818133982834	1.45_113.0017m/z	0.2459197893073255	0.8060675837512868	1.01093e+16	4075414464261090	4119969721300520
11300734	0.2797548033907917	0.042479917680610345	0.61_113.0073m/z	-1.34905e+16	0.17927578610521128	0.5098479258678995	0.5733839587463936	0.2923386220927741
11301236	-0.0844269732417888	0.5478025904818459	1.43_113.0124m/z	-1868384666942310	0.0635837504164765	0.9878050745257728	3853336978537400	3806345821257050
11301528	0.26790178233210266	0.05244506846733474	1.84_113.0153m/z	3.10538e+16	0.002257710943887769	1.35587e+16	0.7968134365660178	1.08037e+16
1130154	0.37726035750879533	0.0053574400622944255	3.64_113.0154m/z	4.76124e+16	4.36084e+09	1.3962e+16	0.4316155929837174	0.6026197430844917
1130243	0.3402479594973522	0.012672375759229516	1.85_113.0243m/z	-0.9731293462291234	0.3319955201188309	0.973259037225404	4786441699190160	4658447639889340
11302435	0.2488458829266096	0.0723660268546222	0.94_114.0316n	0.2338906380471147	0.8153765400143215	1.00736e+16	7545961626825380	7601506311745430
11302437	-0.06531599649078215	0.6421708311739721	0.80_113.0244m/z	-1.04142e+16	0.29929206995118657	0.9920959601874446	712049859579796	7064217891411520
11302438	0.1382925110885079	0.3233813869539123	3.70_113.0244m/z	0.4947685466277075	0.6214596031457409	1.00832e+16	5.61464e+16	5.66136e+16
11303558	0.2453784905203088	0.0765655463744541	1.22_113.0356m/z	1866765747527300	0.06381106969524254	1.26878e+16	1.70548e+16	2163872575966580
11303559	-0.04354399766052144	0.7568705547824294	0.80_113.0356m/z	-1.52788e+16	0.12856704588192008	0.9897931217780392	4.75723e+16	470867462069964
11303568	-0.035359338840997505	0.8015356380390051	0.53_113.0357m/z	-0.07260954053032675	0.94220984584246	0.959842103220402	3054431902824540	2931772341750600
11305295	0.02540066530197084	0.8567292522640182	1.43_113.0530m/z	-1.16153e+16	0.2472011360932045	0.9965206907463968	5146867188736370	5128959646099530
11306076	0.10531196471229816	0.4529587263731542	4.75_113.0608m/z	-0.5675058512321177	0.5711863474667739	0.9931169420522622	4432882511716680	4.40237e+16
11306077	0.1138594901789931	0.41691276943529504	4.03_113.0608m/z	-1.17704e+16	0.24097150248478605	0.9960845233435538	5594714580696560	5572808606356360
113.06077*	0.2799717775506119	0.042313124384283016	3.53_113.0608m/z	-1.34365e+16	0.1810113270779848	0.934341506324864	2.22738e+16	2.08113e+16
11306078	0.011047273480539695	0.9374224146174848	5.06_113.0608m/z	-1.55045e+16	0.12306004705065668	0.9737593619780646	3.81579e+16	3715657440933130
113.06078*	0.0575748413511339	0.6821754142753191	3.69_113.0608m/z	-2.27191e+16	0.024458405254023	0.981714805667144	4464748983316180	4.38311e+16
11392622	0.01580485841011519	0.9105661957109644	4.84_113.9262m/z	-0.5086542283054092	0.6117132181306287	0.9909427747562068	3.53558e+16	3.50356e+16
11392623	-0.04531801238002416	0.7472870290217806	0.73_113.9262m/z	1.24653e+16	0.21444010085130005	1.03052e+16	3742959842375210	3.8572e+16
11398892	0.1622417098017947	0.2457710954316536	0.98_113.9889m/z	1.14128e+16	0.2555033116960236	1.01749e+16	3.98161e+16	4051266011257480
11399167	0.03604475361898719	0.7977687873120497	0.77_113.9917m/z	-0.04777398482004069	0.9619574768418532	1022897179419700	3.95e+16	4040444412692790
11400257	-0.08866220473298121	0.5278284360551432	1.19_77.0540n	-3.44259e+16	0.0007398008200554322	0.8257896202830164	1.61133e+16	1.33062e+16
11400978	0.10067533533177966	0.4732037455615068	0.54_133.0276n	-0.8587756781190734	0.3917819136548494	0.9542911722386409	4652384178296900	4439729151211450
11401963	0.17901421260436592	0.19964759969607407	0.56_114.0196m/z	0.8587382557857839	0.3918025005090938	1.00658e+16	5485750017995120	5521830658970160
11402437	0.10003023907014233	0.4760582011821639	1.24_114.0244m/z	1.27318e+16	0.20484678643328785	1025364648248240	3.29858e+16	3.38225e+16
11402772	0.24256792319525144	0.08010907803692123	1.14_114.0277m/z	0.3903268485991523	0.6968273362425362	1.09237e+16	0.016063141241340034	0.1754683191136258
11402774	0.10087339167004633	0.4723292123918588	0.60_114.0277m/z	-0.7320797964091499	0.4652182692765053	0.4780759486087426	0.7273352982984292	0.34772151269064433
114.02774*	0.14255469443335458	0.3085453038731513	3.49_114.0277m/z	0.8027116265259434	0.4233626717220891	1.14919e+16	1021304835526910	11736766053702
11403084	0.09398246161729212	0.5032584637408879	0.90_114.0308m/z	-1.65369e+16	0.10020196111998447	0.9466861120346696	4206486534367060	3.98222e+16
114056	0.22010771838259172	0.11326443932267258	1.39_114.0560m/z	-1.64715e+16	0.1015405179154736	0.6648227434292598	1214255025896100	0.8072643575390148
114.056*	0.22687229151458715	0.10233210862331207	0.94_114.0560m/z	-2374782031240560	0.018774835147253352	0.9657746122177574	5.81774e+16	5618621524254880
11405602	0.20951709050311	0.13214329695790128	2.95_114.0560m/z	-0.8191857331334768	0.4139301727775113	0.8751992993679826	2300336541549080	2013252929474320
11405603	0.05342634222170039	0.7039850547876483	1.71_114.0560m/z	-3.85731e+16	0.00016734312972229532	0.6958012236204373	1.78748e+16	1243732421827990
114.05603*	-0.10347951991999108	0.4609025068274617	4.03_114.0560m/z	-2.00897e+16	0.046265374765739366	0.5295723115390971	1.32758e+16	0.7030488409492772
114.05603**	-0.24981345902306604	0.07122740934225395	3.36_114.0560m/z	-2992500488815040	0.003217690680661741	0.6892361964547751	1.62387e+16	1.11923e+16
11406411	-0.031098812867323408	0.825047618936037	4.18_114.0641m/z	-0.19959746366589767	0.8420553465632963	0.0	0.0559652997157068	0.0
11493407	-0.18030440512764065	0.19637307940115592	11.24_114.9341m/z	-0.14800622980431347	0.8825289836899086	0.9999058773676346	7029336541376590	702867492171754
11493408	0.130833585563326	0.3504107406772834	0.53_93.9594n	-0.3975315486911809	0.6915189429900575	1.00078e+16	6364938319483980	6369925669009440
11494932	0.18098981990563032	0.19464910026812626	0.56_114.9493m/z	-0.5513219446728995	0.5822017961022128	1013772257254730	3.19109e+16	3.23504e+16
11494934	-0.12172160086769836	0.3852569077144359	7.89_114.9493m/z	-0.3918470928038543	0.6957059675680926	1.00323e+16	570733823695221	5725792897993310
11498873	-0.07987098089397497	0.56968617082881	0.71_114.9887m/z	-0.9065358362389396	0.3660504132191669	0.9972136735404928	7987344138126180	7965088789812930
11500363	0.045277693863671815	0.747504422191018	0.87_115.0036m/z	0.5093639890331139	0.6112168754476709	1.06041e+16	4865097414712140	5158994809540760
115.00363*	0.13909888141555465	0.32054048563645743	1.84_115.0036m/z	-1.16456e+16	0.2459765201732637	0.9940385277516436	7992973939215260	7.94532e+16
11500364	0.12813224496771958	0.3605328278771273	2.30_115.0036m/z	2.40998e+16	0.01711728310107499	1.0341e+16	6240290153774670	6.45307e+16
11501828	-0.09245170608630293	0.5102671982271202	1.72_115.0183m/z	1008090673366490	0.3149720054370896	0.0	0.04118368079383555	0.0
11502071	-0.08882169152419328	0.5270833673822817	1.43_115.0207m/z	0.6410006184885699	0.5224628376428775	1.01291e+16	4.22919e+16	4283777864725700
11502073	0.10748916459532423	0.4436187247034344	1.21_115.0207m/z	-0.5838500268773289	0.5601644669622897	0.99396404998241	4014454067538680	3.99022e+16
11502299	0.02809341856197349	0.8417264648559842	1.10_115.0230m/z	-1.31489e+16	0.19047806749620064	0.7178680003112052	0.6256916509520808	0.4491640142803869
115023	0.022182485678736395	0.8747251387854733	1.33_115.0230m/z	-1.23238e+16	0.2196596996999824	0.6590910547108927	0.4142705841009515	0.2730420362107937
11502301	-0.005362470772845158	0.96960099646384	1.56_115.0230m/z	-0.6160165086716491	0.5387814142423036	0.9407210154438428	0.9743382279550744	0.916580447187652
11502302	0.2417095055322463	0.0812167520512126	0.56_115.0230m/z	-0.30161159109658703	0.7633498565231287	0.9858695394126104	2147048711681950	2116709924482320
11503631	-0.14317105156714038	0.3064365913225135	4.53_115.0363m/z	-0.7393696044357472	0.4607936977371235	0.9968745116824131	474312429857622	4728299718992150
11504005	0.4320532212316183	0.0012354820223241198	3.45_80.0706n	-0.8377061772643583	0.4034773366357036	1.0017e+16	8860236260177640	8875259704679600
11507479	0.1470445932974909	0.2933968483089989	4.54_115.0748m/z	0.14472261028085875	0.8851166923207622	1.0562e+16	2.51128e+16	2.65241e+16
11507643	-0.09942546132485727	0.4787425470481443	4.54_116.0837n	0.8746358016392999	0.3831166554672536	0.9993865568666868	1.12304e+16	1.12235e+16
11507644	0.13333333357717073	0.34120150175897435	7.39_115.0764m/z	0.1557169903568646	0.8764574183418599	1.00322e+16	3.49093e+16	3.50217e+16
11507645	-0.052172160159921065	0.7106263374298876	8.99_115.0764m/z	-0.6186896665979152	0.5370231688935568	0.963596075186751	2.33676e+16	2.2517e+16
11590293	0.03870577569824128	0.7831885303699989	1.10_115.9029m/z	0.2384859233352555	0.8118172187591525	0.9964459384063148	1.43713e+16	1.43202e+16
11591903	-0.2063501666912488	0.13822406315582686	11.23_115.9190m/z	-0.8058134492494007	0.4215770324142173	0.97272116020702	4091301529412500	3.9797e+16
11591904	-0.24009028566268456	0.08333894063505251	10.67_115.9190m/z	-1.22172e+16	0.22365710036942965	0.5833682890688353	0.8790794109278304	0.512827051908608
1159207	0.07253301091785005	0.6057583512712108	0.51_115.9207m/z	0.4863122549463526	0.6274282585408948	0.9990457983121948	7511279247451920	7504111972116430
11592072	-0.16599133182256184	0.2348800015997692	11.44_115.9207m/z	-0.4035644909642776	0.6870856282539757	1.00091e+16	1.2322e+16	1.23332e+16
11599088	0.0070960588780109015	0.9597806510942156	0.58_115.9909m/z	-0.6657244543034968	0.5065704017019808	0.9924950701626858	1.67596e+16	1.66338e+16
11599205	-0.03572220548816851	0.7995408594971083	0.71_115.9921m/z	0.8982347254469869	0.37044468197500297	1044257683021920	2.98399e+16	3116054946573550
11602542	0.01995766559440566	0.8872036345722605	12.37_116.0254m/z	0.5275473091556089	0.5985630765847734	1.01345e+16	397352937276016	4026988850171000
116.02542*	0.1999395225912276	0.15116962238578427	1.32_116.0254m/z	-0.3405510314961415	0.7338997667541314	0.9561210359922998	2.22926e+16	2131438862614150
11602548	0.06777542598827457	0.6296623819324386	0.54_116.0255m/z	-0.8898148033438527	0.3749354827327868	0.970781398082174	5125758248729100	4.97599e+16
11603531	0.11256929765571838	0.4222459687479311	1.29_116.0353m/z	1.69043e+16	0.0929425349373271	1.01857e+16	7.51353e+16	765308289819075
11604342	0.08302196175457421	0.5545080232441384	4.50_116.0434m/z	-0.3614272041426873	0.7182691515847364	0.9277078036996904	0.7549556744983414	0.7003782706794748
11604653	0.1406309850369433	0.3151865203697127	0.86_116.0465m/z	2083406891174450	0.03884516216455166	1.04566e+16	3.5485e+16	3.71052e+16
11605057	0.28884185114812555	0.03594081121027415	4.41_116.0506m/z	-0.4795770371770404	0.6321998368028088	0.8886232182619938	3.1606e+16	2.80858e+16
11605058	-0.3252951698670276	0.017465741789965062	5.69_116.0506m/z	-1.99779e+16	0.047478169606043945	0.4668959811993613	1.12386e+16	0.5247254443924588
11607168	0.09261163206131272	0.5095326497860087	1.23_116.0717m/z	-1.14366e+16	0.25451500334091065	0.9865167935821084	7806636183910820	7701377696813770
1160717	0.04922890846620063	0.7262949546009976	4.15_116.0717m/z	-0.09523709562640256	0.9242487309204034	0.9854059089994024	2.84546e+16	2.80394e+16
116.0717*	0.16808789467288324	0.2289370889262289	2.46_116.0717m/z	0.22160913455409464	0.8249079965025788	1.01498e+16	1.96516e+16	1.99459e+16
11607171	0.02560225788373251	0.8556042612345987	3.82_116.0717m/z	-131668495309975	0.18987531198175	0.9527220601143856	2.7394e+16	260988229064007
116.07171*	0.14317105156714038	0.3064365913225135	3.43_116.0717m/z	-0.5958088301904372	0.5521663959129894	0.8799730121980234	1583826653326180	1.39372e+16
11607586	0.08341425666861395	0.5526318779955439	1.29_116.0759m/z	2137395972716290	0.0341241751159044	inf	0.0	0.08322230794854149
11607982	0.09566562053095752	0.4956092852324286	4.99_116.0798m/z	0.5073651259906466	0.6126151605147	0.9391192519210849	0.6827812255041081	0.6412129937211797
11608268	-0.027779457766758584	0.8434729479557412	4.54_116.0827m/z	0.2505953152973986	0.8024567468148966	0.9662720436721371	3.82505e+16	3.69603e+16
1169074	-0.0574538858020769	0.6828077781430986	1.11_116.9074m/z	3.23368e+16	0.0014916017721316704	1.09496e+16	1151285912780500	1.26061e+16
11692281	0.0033867553735961115	0.9807983062049972	0.96_116.9228m/z	0.4786994224013469	0.6328227307035325	1.0192e+16	2.4549e+16	2502042675728580
11692284	-0.28275375517892304	0.0402217723044583	1.57_116.9228m/z	0.8189201207929718	0.4140812503957197	1.0025e+16	1437186219934840	1.44077e+16
11692285	-0.33133756738348624	0.015369702173664212	1.36_116.9228m/z	2.9045e+16	0.0042127537425789355	1.10517e+16	0.31039661177112604	0.3430412408516943
11692686	0.08551557318330183	0.5426341237784333	0.56_116.9269m/z	0.42063904111924383	0.6745975645598552	0.7595394519257231	0.9930024774736392	0.7542245575012132
11693982	-0.22026005483280425	0.11300879934797088	0.57_116.9398m/z	-0.4117527706344287	0.6810858250481153	0.9132031713840528	1.43566e+16	1.31105e+16
11698295	0.0017336962031503909	0.9901698820455302	1.03_116.9829m/z	-0.4093157312325961	0.6828694115718601	0.9381108489589399	1.34462e+16	1.2614e+16
11698297	0.05342203416684343	0.7040078301602739	0.65_116.9830m/z	-1.11489e+16	0.266610293403216	0.9417046818695964	1667885056015450	1.57066e+16
11701758	-0.09148271360344737	0.514729294722343	2.09_117.0176m/z	0.7550346946752848	0.4513665564670375	1.0918e+16	1.96778e+16	2148418145886450
11701928	0.10482814251607013	0.4550488112698149	2.08_118.0266n	-0.4108718474053609	0.6817303358177478	1009425708040040	1.02616e+16	103583700279335
11702065	0.006411161066604047	0.9636597998156116	1.11_117.0206m/z	-0.0841560616153433	0.9330402504451922	0.8937822282710964	1.74083e+16	1.55593e+16
11702076	0.1368813630161762	0.32839114686060444	0.54_136.0386n	0.20345351962550212	0.8390457181658778	1.02157e+16	6035081688735440	6165281370363570
11703055	0.04239820666231628	0.7630797490479261	0.97_117.0306m/z	-2172347812171040	0.03133920429990577	0.37425348869461983	0.7363453171602188	0.2755798038311582
11703226	-0.061284144855548686	0.6628898549403826	2.08_117.0323m/z	1.03931e+16	0.3002700564606608	1.10682e+16	1.17748e+16	1.30326e+16
11703867	-0.1835298864358274	0.1883542189979102	1.70_117.0387m/z	-1.57376e+16	0.11756879717439316	0.8504044108726784	1.39502e+16	1.18633e+16
11705571	0.36024594360811024	0.008056153846080065	0.99_117.0557m/z	-0.3334130398263937	0.7392702293072004	1.01452e+16	4675487777888010	4743359827108640
117.05571*	0.08366092143109444	0.5514537563865558	1.35_117.0557m/z	0.4604967456865808	0.6458009740298599	1.01733e+16	3899624627329140	3967209176287110
11705572	-0.06200987814989072	0.6591413383342084	1.72_117.0557m/z	-0.8500441659528659	0.3966032576788089	100013673471838	3.46611e+16	3.46659e+16
117.05572*	0.271424252083917	0.04930337570262576	3.79_72.0575n	0.0862716736952713	0.9313610862147488	1.00944e+16	7844662166521520	7918700678512040
11705573	0.2665053930889322	0.05373461225538855	0.56_117.0557m/z	-0.09372802852875753	0.9254454762929482	1011362446789140	426133147441519	4309750626544120
117.05573*	0.2945267619538047	0.03229062384497255	3.64_117.0557m/z	-2.13812e+16	0.03406474446689865	0.990993622592364	8722624253723470	8644065007709440
11705575	0.3179921384708635	0.020319080726339474	5.10_117.0557m/z	-0.8726221419511228	0.3842102131182069	0.9857306138652197	4.40297e+16	4340146315595680
11706058	0.1740147165766764	0.21270145660327025	2.09_117.0606m/z	0.6900907164265444	0.4911625072933039	1.03059e+16	119637662365689	1.23297e+16
11707506	0.08761213603362322	0.5327469722485474	1.51_117.0751m/z	-0.4612023810084025	0.6452957987534396	0.9385301016608778	1220559734820660	1145532052004410
11708317	-0.21880858824412025	0.11546253707590035	4.54_117.0832m/z	-0.4713629136400214	0.638040129335001	0.9998533935866888	4332790986696080	4332155771749890
117925	0.2343312170397691	0.09124184796280134	7.52_117.9250m/z	-0.5351821359911029	0.5932859917136857	0.978699558992758	2842677681782330	2782127393518920
117.925*	0.211309344202586	0.12879232493342155	3.71_117.9250m/z	-0.17864910174793044	0.8584450358584451	0.9708022296408828	2.498e+16	242506878232628
11793277	-0.15424020267187505	0.270146655907996	0.56_117.9328m/z	0.4197267195287565	0.6752625772658929	0.9388015675847812	0.9324760101503652	0.8754099400643651
11793588	0.019272250816415967	0.8910535826460918	5.14_117.9359m/z	0.8668056311952109	0.3873797980283789	1007816532806060	4779400299442950	4816758638676870
117.93588*	-0.05301884900332008	0.7061404848329003	0.55_117.9359m/z	1.01136e+16	0.31340798404670583	0.9991216538686774	3.8884e+16	3.88498e+16
11793589	0.21469609957618208	0.12263558224542775	6.80_117.9359m/z	-0.4873225789784421	0.6267138408795383	0.9987698347870368	6040565994064320	6033135099911810
1179359	0.1089809497003606	0.4372812298107472	7.86_117.9359m/z	0.015725822268283948	0.98747322059003	0.9984889857830476	5566908577537040	5558496899531910
11800471	0.10623929058840184	0.4489674706904008	10.93_118.0047m/z	-1.21498e+16	0.22620775190679066	0.9900800817585594	3.91388e+16	3875053060369360
11800501	0.15091220670678865	0.2807429214923979	0.54_118.0050m/z	-0.3166857452861657	0.7519054501329935	0.9976895601553608	5148528490085210	5136633124720460
11801458	-0.30081067635850417	0.028619855162743468	0.86_118.0146m/z	-2374092356628320	0.018808681915487818	0.05344690555902548	0.943726877102768	0.05043928127402568
11801602	-0.09559520227138547	0.4959280918801138	0.53_137.0339n	1.29993e+16	0.19554321838433594	1.00859e+16	7364133391007970	7427367785980550
11802264	0.0291123162898624	0.8360638435179835	1.18_118.0226m/z	-2.47311e+16	0.014466648785306856	0.7774502324255637	1.68366e+16	1.30896e+16
1180255	0.06390484841845044	0.6493928220739009	2.06_118.0255m/z	-0.5024587989474328	0.6160533688869948	0.9982986857976698	3.17302e+16	3.16762e+16
11802985	-0.1395827036117826	0.31884356555894977	0.99_118.0298m/z	-0.8189931464045352	0.4140397108821844	1.00137e+16	2557097877661960	2.56061e+16
118.02985*	-0.05838121167818059	0.6779652055472395	1.98_118.0299m/z	-1.57131e+16	0.11813578629312338	0.9422210317269094	2.65046e+16	2.49732e+16
11802986	0.269851829946176	0.05068634812911154	1.52_118.0299m/z	0.28494328476615943	0.7760655251519231	1023523747067350	3.0888e+16	3161457190490500
118.02986*	0.13905856289920224	0.3206821536708325	2.47_118.0299m/z	0.6994144558002557	0.4853346152445534	1011461963012760	3262564814153070	3299960211379650
11802987	-0.01782078422773192	0.8992145382756682	5.83_118.0299m/z	-1.4577e+16	0.14693406035748555	0.9816883147959278	4146855544140640	4070919630829570
118.02987*	0.08358028439838977	0.551838763623594	3.93_118.0299m/z	-0.5802502499637147	0.5625830586766556	1004256767687480	3.26206e+16	3.27594e+16
11804104	-0.08950710630218296	0.5238872793113879	0.54_137.0589n	0.17852227142373353	0.8585444614213512	1.01578e+16	4318631957608280	4386779521435210
11805096	-0.2762221555298448	0.04527228836913886	4.22_118.0510m/z	-0.7162654892340601	0.474898299001121	0.886369086355136	0.6988454017560496	0.6194349602579976
11805098	-0.1377280518595752	0.3253794610826373	0.80_118.0510m/z	-1.30437e+16	0.1940276841562197	0.9942372186688816	6.92132e+16	6.88143e+16
11809532	-0.06926721109331095	0.6221249077477322	5.11_119.1026n	-0.7404701010436516	0.4601278175566706	1.0016e+16	8201544444377520	8214678119474060
11891824	-0.04926922698255296	0.72607954648852	0.56_118.9182m/z	0.3456086808443541	0.7301024292883252	0.9920233887769776	4.19613e+16	4162662851068340
11893075	0.30561435395069675	0.026054859002491576	0.79_118.9307m/z	1.00145e+16	0.3181615108067605	1.01942e+16	3916366741663020	3992409803603490
11894354	0.1445821996394721	0.3016436766243142	0.60_118.9435m/z	0.1896587198519151	0.8498231203160899	1.02126e+16	306563221476629	3.1308e+16
11896624	-0.3246043751526464	0.01772017123450648	0.97_118.9662m/z	0.5291332008965277	0.5974651626001746	1.06684e+16	1.65721e+16	1.76798e+16
118.96624*	-0.07652454403673119	0.586013247692871	0.71_137.9841n	-1.28601e+16	0.20034628969654011	0.9972714831406452	7647425224780900	7626559096124430
11899855	0.2659812523763518	0.05422522769601891	0.91_118.9986m/z	0.5879061840184721	0.5574453568626341	0.9977078070450248	4420564522916750	4410431736060310
11902506	-0.02527970975291384	0.8574043826149091	1.33_119.0251m/z	0.09860705261888794	0.9215768606727768	0.9937959063270788	2.07783e+16	2.06494e+16
11902508	-0.01987702856170099	0.8876564373741883	5.04_119.0251m/z	-1.02344e+16	0.3076845826489543	0.9422605495944334	2.49249e+16	2.34858e+16
119.02508*	0.019433524881825308	0.8901474849398879	0.97_119.0251m/z	0.2446103812831913	0.8070795717595107	0.9875722405762292	2.67857e+16	2.64528e+16
11903187	-0.04209253107183738	0.7647387660060955	2.47_119.0319m/z	1.57258e+16	0.11784290854351707	0.9771375455427641	0.872029488566918	0.8520927540991899
11903317	-0.13074705636571507	0.35073223377542306	1.17_119.0332m/z	-1.48055e+16	0.14074371605977234	0.7634456329348938	0.7399801701109324	0.5649346293296111
11903491	-0.05273661938885375	0.7076346775631727	1.15_119.0349m/z	-2.69442e+16	0.007823692265887007	0.9747199750799844	842628693152825	8213270187916010
11903494	0.3720592688993443	0.006082728002973328	1.03_119.0349m/z	-3.74887e+16	0.00024977742156410585	0.9803677225845384	8956561210258310	8780723515889950
11903496	0.23550045401398675	0.08959181657721042	5.72_119.0350m/z	-0.8862882997895927	0.3768264096633983	0.97302145080197	3.07822e+16	2.99518e+16
11903636	0.1450660218357001	0.3000116003327534	0.53_138.0542n	0.19759412928422512	0.8436198599927318	1.01089e+16	4519160071015270	4568355949753740
11905016	0.0759600848077985	0.5887878318064155	5.72_119.0502m/z	-0.963854823931574	0.33661044474698176	0.9267016783340768	2465978826736600	228522671747311
119.05016*	0.1634915838087171	0.2421032186075935	3.56_119.0502m/z	-0.3433358126056415	0.7318081031996897	0.9478361322021214	1.73988e+16	1.64912e+16
11905018	0.08136276599901135	0.5624763581241023	5.52_119.0502m/z	-0.04014193084016265	0.9680313004466649	1.00413e+16	3.68566e+16	3.70088e+16
1190502	0.1863118640641385	0.18162850786532336	4.33_138.0680n	-2.04584e+16	0.04245134771257349	0.9635144399337131	3.22594e+16	3.10824e+16
11905021	-0.0674986391540577	0.631065045663701	4.57_119.0502m/z	-1.72249e+16	0.08696311962959752	0.6162031806832439	1.75617e+16	1.08216e+16
11905022	0.04713234561587922	0.7375247586798718	5.11_119.0502m/z	-1.67588e+16	0.09576496722108488	0.9391374901965605	3.03405e+16	2.84939e+16
119.05022*	0.08011289199208899	0.5685141111040993	4.01_119.0502m/z	0.30107219469339824	0.7637603563896487	0.9578705503032018	1.23597e+16	1183903571445580
119.05022**	0.4651950416732373	0.0004485507486824758	3.29_119.0502m/z	-0.6874863653363282	0.4927971370719694	0.9991080334562296	3.41481e+16	3.41176e+16
11990755	-0.16546719110998148	0.2363821392991585	2.63_120.9148n	-0.16885630405872862	0.8661284122834005	1.00189e+16	5.66047e+16	5671190098992790
11990756	-0.036689849880624535	0.7942276830527207	10.85_119.9076m/z	-0.44162321134280935	0.6593734234390347	0.9973622215088941	6358512530514440	6341740182926020
119.90756*	-0.023465376517058774	0.8675432214851286	4.00_119.9076m/z	-0.8713480558064425	0.3849031257456029	0.9950120778817266	6619796620654210	6586777590671580
119.90756**	-0.054873500755527466	0.6963490590324279	3.68_119.9076m/z	-0.7502528758648391	0.4542324810406851	0.9966891712939108	5555296101223440	5536903467420680
11994694	-0.182400967977962	0.19113371220020606	0.91_119.9469m/z	-1.56598e+16	0.11938003027891615	0.9832391591890188	6614293018869090	6503431906502640
11994695	-0.2425207646516062	0.08016961908950829	1.19_119.9469m/z	-0.9224624910239524	0.3577118762526791	0.9437281174776196	2.52275e+16	2.38079e+16
11994699	0.057776433932895575	0.6811219557202178	7.91_119.9470m/z	-0.05198426875112131	0.9586077342237088	0.9851129784438969	5370197877712160	5290251626146120
11997605	0.3193226495104905	0.01977167203893677	0.92_119.9761m/z	-0.012819275851230712	0.9897883574683576	1048661878313450	0.8267740565569344	0.8670064350898293
12001245	-0.04891769661015875	0.7279583591978009	1.30_120.0124m/z	-5769496249999930	4.15272e+07	0.34620756669936104	0.6414229345609631	0.2220654733995145
12002041	0.12506803772494213	0.3722276615738619	0.54_139.0382n	-0.24476057560224904	0.8069634761114763	1.00034e+16	5486121531581520	5488012756979540
12003167	-0.004112488667938136	0.9766846937584552	0.53_120.0317m/z	1694221330118290	0.09221873442545166	1.00525e+16	7181728884624790	7219419077137850
12003814	0.3318418558986636	0.015204920528775303	2.01_120.0381m/z	-1.85449e+16	0.06555670013973143	0.0	0.1808477814985392	0.0
12004417	0.03197258346740139	0.8202125105747922	0.54_120.0442m/z	0.4717143533954761	0.6377897850631806	1019039351742000	2787642643840110	2840717552667200
120.04547*	0.32295885351104336	0.01833896139656387	4.00_120.0455m/z	-2624418328615730	0.00954249485169312	0.7077653226922581	1.25616e+16	0.8890666693289617
12004549	0.15183953258289234	0.2777632039421723	5.55_120.0455m/z	-0.8696512861237415	0.3858271119501966	1.00586e+16	2109533130485860	2.12189e+16
12005676	-0.07999193644303196	0.5691000011540643	0.54_139.0746n	0.37620328461416797	0.7072769133518493	0.9406793770035168	3705436160204600	3485627378707570
12006663	0.08624130647764383	0.5392016311505183	11.05_120.0666m/z	-0.7008426294418083	0.4844452718569617	0.9964866823898776	6824939792760130	6.80096e+16
12090768	-0.08809595822985125	0.5304779500410416	1.45_120.9077m/z	-0.0985476935696274	0.9216239158517378	0.9926991652791268	1.66817e+16	1.65599e+16
1209077	0.14906677895189335	0.28673515557872	0.66_120.9077m/z	0.2093346882096293	0.8344600890067084	0.8211615731687021	0.6333996921618272	0.5201234876601777
12099648	-0.3089607908079405	0.024384297247379796	1.12_120.9965m/z	-3.78014e+16	0.0002227195188929851	0.8684101254953931	3346632269583990	2.90625e+16
1210044	0.09611934298396584	0.4935576825881439	0.54_100.0297n	-0.8755843833851406	0.3826021771134861	0.98528915724801	3.52983e+16	3.47791e+16
12101569	0.07382320344112478	0.5993445135318685	0.53_140.0335n	-0.047839650637945735	0.9619052271211233	1.00609e+16	4620839255832140	4648979931038480
1210295	0.2748513259738654	0.04639550568661178	4.70_121.0295m/z	0.6512897094968847	0.5158177462404476	0.999204064807084	7185003107600630	7179284310766080
121.0295*	0.0071363773943632376	0.9595523215591508	4.33_121.0295m/z	-0.707514164512512	0.4803026538469729	1.00405e+16	6066444140421610	6091039326244630
12102951	0.22695292854729185	0.10220689104001884	5.85_121.0295m/z	-1.71162e+16	0.0889532605796226	0.9971274731689866	7.54039e+16	7.51873e+16
121.02951*	0.05447031559200414	0.6984735231243638	5.12_121.0295m/z	-3884143236580020	0.0001513606691546951	0.9850361866622912	8704565759363150	857431226215423
12105198	0.20812418141075156	0.13479254868260826	12.49_121.0520m/z	-0.5973795388350918	0.5511201234369336	1001563142169770	2082372620985650	2085627665442690
12105204	0.0273359540868829	0.8459413159855841	0.53_121.0520m/z	0.8823260199513165	0.37895807293489625	1.0005e+16	453678570554552	4.53904e+16
12106579	0.08924504086282098	0.5251081506496922	5.64_121.0658m/z	-1.73166e+16	0.08531184582852933	0.7842075972394258	1103520345289160	0.8653890384840368
12106586	-0.3017218128896516	0.02811775414060159	8.41_121.0659m/z	-0.4986704518414089	0.6187139672234179	1.8735e+16	0.058808818332172816	0.11017851489225246
1210659	-0.0017579608518272735	0.99003230753766	5.28_121.0659m/z	-1.44199e+16	0.1513110998111005	0.7198284117404102	2035842627820730	1.46546e+16
12107774	0.24836206073038156	0.07294077293672252	7.52_121.0777m/z	-0.4383292650678216	0.6617539993737598	0.9998146957178836	2.93961e+16	2939063501758040
121.07774*	0.2555387566410971	0.06477858392474466	6.61_121.0777m/z	0.4901577648793107	0.6247109207079742	1.02929e+16	3.69261e+16	3.80077e+16
12107775	0.05390585636307145	0.7014516238620692	8.67_121.0778m/z	-0.9710359102772804	0.3330335724070719	0.9977920386573741	3098264823533320	3091423974573740
12190464	-0.2213486547743173	0.11119481045657156	11.24_121.9046m/z	-0.920612458077188	0.3586742339530399	0.9961232440783307	6681233282199390	6.65533e+16
121.90464*	-0.016328999122695538	0.90761296783015	10.85_121.9046m/z	-0.2950149657800235	0.7683747023547371	1.00803e+16	4709356995261780	474715656676171
121.90464**	0.10039310571731333	0.4744514443324993	0.56_121.9046m/z	-0.4197975887833389	0.6752109098181068	0.9940116771023596	2.93243e+16	2.91487e+16
12194401	-0.2157443810013428	0.12077587793368315	0.88_121.9440m/z	-1.64142e+16	0.10272390200371144	0.9814364579093432	5629309776393210	5524809847417790
12194406	0.07737123288013023	0.5818624454418044	8.38_121.9441m/z	0.3112866744891473	0.7559982850909119	0.9985378103967985	6816007094841700	6806040800132280
121.94406*	0.16014514695147328	0.2520081843650605	4.42_121.9441m/z	1.23876e+16	0.21729521444881025	1.01396e+16	3997180598296340	4.05298e+16
12194407	0.1049087795487748	0.4547000982953472	10.93_121.9441m/z	-1439181832601620	0.15210249624281247	0.9871197482729946	4982481210419900	4.91831e+16
12202477	0.07249269240149774	0.6059592632667626	4.46_122.0248m/z	-1.37369e+16	0.1715071882493764	0.9960238770407398	5373071638732150	5.35171e+16
12203288	0.1071262979481532	0.4451679371587269	0.56_122.0329m/z	0.15220434453026366	0.8792224390607795	0.9978215135460954	4130993448672870	4121994135403760
12203608	0.030924302042240687	0.8260140723876902	0.53_141.0539n	0.22127562646930904	0.8251671969113609	1.00761e+16	4927539482937700	4965034807806290
12203731	-0.2587642379492839	0.06135668865188613	4.98_122.0373m/z	0.7151084688926964	0.47561087457324297	0.9477086597340606	0.8069494651101736	0.7647529960526798
12204733	0.12079427499159465	0.3889146971863988	0.53_122.0473m/z	1312661234160260	0.19122500007239532	0.962714318299934	3.59326e+16	3.45928e+16
12206117	0.07404949224337179	0.5982226649771607	4.87_122.0612m/z	-2.23879e+16	0.026584708583788474	0.8175503057808159	1.87924e+16	1536376132828130
12208403	0.14784799946401125	0.2907382215679017	4.64_122.0840m/z	-0.9658682207215308	0.3356050714735106	0.9909528854964148	4526165505253730	4.48522e+16
12208404	0.2286463062340899	0.09960455520257076	5.54_122.0840m/z	-0.6436844023174133	0.5207252751148448	1003123988291110	3.34003e+16	3.35046e+16
12208405	0.20671303333841984	0.1375169029382155	7.94_122.0840m/z	-0.5073048125520192	0.6126573743668726	0.9659093242156818	2142397737431720	2069361950763880
12294055	0.027618183701349244	0.8443703650429815	2.13_122.9406m/z	-2152824568701060	0.0328695226109867	0.9188892170670256	3138999999946100	2.88439e+16
12294058	0.252393912365615	0.06826036900093707	5.93_122.9406m/z	0.16005856426371587	0.8730420030780319	0.9793392721692769	3.5366e+16	3463529013387060
122.94058*	0.1079326682751999	0.4417293072680387	4.51_122.9406m/z	-1.99348e+16	0.047951881634977836	0.9689828640300066	3153953288261510	3.05613e+16
122.94058**	-0.03165003533658271	0.8219966053264978	1.01_122.9406m/z	-1336688351389280	0.1832705543434481	0.9643936285871894	2840284517897430	2739152292435120
12294059	0.26606188940905645	0.05414951324199509	3.72_122.9406m/z	1.18906e+16	0.2362220013968405	1029921393047080	2140301716796940	2204342525704570
12297576	-0.18740046400565152	0.17904434830965532	0.86_122.9758m/z	-2.78126e+16	0.006082490236135797	0.9561218534247148	5619779762806800	5373194242653540
12297577	0.2865033771996901	0.03753827500568312	1.43_122.9758m/z	4036276921787470	8.48688e+10	1.29571e+16	1.18549e+16	1536056562381200
12300878	0.11301280133559405	0.4204083211192469	0.95_123.0088m/z	-0.1352046539774204	0.8926243644278622	1007105379047020	4087426407725100	4.11647e+16
1230088	0.140469710971534	0.3157473952746418	0.60_123.0088m/z	0.06169123708955401	0.9508876863398013	1027550711923570	4758275045701370	4889368910738620
12301215	0.2707388373059273	0.04990238544121395	1.30_123.0121m/z	0.08802386240349433	0.9299706047738029	1.08028e+16	3.49791e+16	3.77873e+16
12302009	0.1268823709607972	0.3652758026876971	0.54_102.0454n	-0.3244950272059142	0.7459979938111054	0.9911723398981444	4941277849595920	4897657928270860
12303125	0.13606210438985528	0.33132190287001706	1.79_123.0312m/z	-0.6794655508726022	0.4978498684743555	0.8456916118522415	2145609781091100	1.81452e+16
12303137	0.1290998893601756	0.3568867283142807	0.53_124.0386n	0.3984081090250665	0.6908741338196872	1.01728e+16	4.2832e+16	4357201694113020
12303261	-0.09394214310093978	0.5034424317170203	4.44_123.0326m/z	1.91063e+16	0.057887119557992577	0.9927484858920194	0.5661783106424998	0.5620726606352431
12304508	0.06724660247736759	0.6323434065298836	4.61_123.0451m/z	-4259468030613320	3.52968e+11	0.5113917667327719	1.91874e+16	0.9812275621144138
1230451	0.23775829092971754	0.08647159743296566	5.02_123.0451m/z	-3.32434e+16	0.0011046673073054683	0.8627097038845438	3.84256e+16	3.31502e+16
12304512	0.3123740023505102	0.02277410470699553	5.35_123.0451m/z	-2961282350224870	0.0035428669149486555	0.6445510313340949	2917977551795280	1.88079e+16
123.04512*	0.2367100095045568	0.08790951194117685	3.78_123.0451m/z	-0.8450884906696682	0.3993556823385217	0.8078515782670562	1.56103e+16	1.26108e+16
12304515	0.08148536414977492	0.5618857463698328	3.88_123.0452m/z	-3.25232e+16	0.0014030308014715061	0.7656994308184203	2.69801e+16	2065865765847490
1230452	0.23945962533104936	0.08417719511112935	0.56_123.0452m/z	0.06012325425779207	0.9521344227312032	0.987373355662418	1.55504e+16	1.53541e+16
12305641	-0.02691803636047077	0.8482686263091908	3.82_123.0564m/z	-0.7871871757489499	0.4323666215989075	0.8399555638510409	1.37357e+16	1.15374e+16
12305642	-0.035036790710178824	0.8033098293958556	4.00_123.0564m/z	-3.26495e+16	0.0013457957604054234	0.8604837726418518	3008526368361280	258878811954001
12305643	0.08309646220216174	0.5541514934462672	3.90_123.0564m/z	-0.5031833390882751	0.615545094534792	0.9187459504888579	1.90401e+16	1.74931e+16
123.05643*	-0.01165205122582472	0.9340040281172124	3.45_123.0564m/z	-2.28179e+16	0.02385386622875496	0.778862139526813	2.19466e+16	1.70933e+16
12307537	0.3936699936641957	0.0035411179175980235	3.21_123.0754m/z	0.2498808798786173	0.8030082208451981	0.9663178978404432	2.03724e+16	196861673600522
12308157	-0.26580344721336896	0.05439248138452114	5.31_123.0816m/z	1.67753e+16	0.09544113654648437	0.3175340694090002	0.08281227692855267	0.026295719290148397
12311566	-0.10386049812361407	0.4592447451136593	1.15_123.1157m/z	-0.6103149299402864	0.5425412859608211	10188583085753	3.44294e+16	3507869389335310
12387781	-0.2490474755083712	0.07212761360218149	1.14_123.8778m/z	-1084107258379720	0.27998988909099404	0.9885240876081468	4799335466546890	4744258713193680
12389463	0.10345731296009077	0.4609992366240614	9.23_123.8946m/z	0.3501095697096031	0.7267287192804096	0.9945555291676706	2128331904212680	2116744263238680
12393968	0.28001209606696426	0.04228218985667466	0.98_123.9397m/z	0.1182502012078898	0.9060215380372078	1.00826e+16	1.70044e+16	1.71449e+16
12395195	-0.303356517034966	0.027235374680534004	3.72_123.9520m/z	1.24751e+16	0.21407932360418772	1.00988e+16	0.3993587772874024	0.40330412637338503
12397094	0.11171176476116318	0.4258120599618458	0.88_123.9709m/z	1542940574575180	0.12487130840714453	0.7871688167278967	0.21440317331379574	0.16877149224012675
12400549	0.005222066509728106	0.9703965669290844	0.80_124.0055m/z	-0.6620509091897455	0.5089154115223522	inf	0.0	0.14181452073333412
12400736	0.01020058463714067	0.9422100226846372	0.81_124.0074m/z	-0.27576679421324185	0.7830921483792773	1004502707483660	9824721426718460	9868959273411430
12401252	0.20954966276211529	0.13208181772683394	1.79_124.0125m/z	0.5620713206896242	0.5748741354684712	inf	0.0	0.08318164857749062
12401513	-0.014030843690612462	0.9205704031249292	1.79_124.0151m/z	-1193308463428460	0.2345602361708997	0.9919390464785036	6948216572305300	6892207321458660
12401647	0.01419494220973114	0.9196444658512184	4.17_124.0165m/z	-2219762336302510	0.027877196125074638	1791774617264720	0.0007993628234915629	0.014322780171172462
12401656	0.3494002627093322	0.010335422271615366	6.08_124.0166m/z	-0.5494062358113644	0.5835123112966312	0.9389404265210302	1.79766e+16	1.6879e+16
12404039	0.20505997416797409	0.14076043585629694	5.35_124.0404m/z	0.4214346640670989	0.6740178256116315	1.01797e+16	2.15629e+16	2.19504e+16
124.04039*	0.3681080542968155	0.0066896943666625705	3.96_124.0404m/z	-3.12444e+16	0.0021245013501716018	0.9141446397077504	4060507962880050	3.71189e+16
1240404	0.210825522006358	0.12969054669854752	4.60_124.0404m/z	-1.5482e+16	0.1236014638596076	0.9250556277865652	2.53872e+16	2348458546988070
12404833	-0.11822646978163845	0.3991497371091664	5.11_124.0483m/z	0.8235776880313448	0.41143685082941495	0.9276139537887346	2.05225e+16	1.9037e+16
12405158	0.07575849222603684	0.5897801787502253	0.98_125.0589n	-0.5352875740377838	0.5932132652396909	0.8755077960758176	3417589508211140	2.99213e+16
12405167	-0.01995766559440566	0.8872036345722605	0.53_87.1031n	-0.3005729759370128	0.7641403393905348	0.9648703496717465	6638170037164130	6.40497e+16
12412189	-0.003467392406300781	0.9803412117473193	2.47_124.1219m/z	1.03491e+16	0.3023141024149823	1.01288e+16	2952077906584730	2.9901e+16
12489119	-0.04906763440079129	0.7271567969171326	1.10_124.8912m/z	-1.75035e+16	0.08202455492883289	0.979184925851587	3.94859e+16	3.8664e+16
1248912	-0.02108658405227103	0.8808682102764507	7.13_124.8912m/z	-1.30504e+16	0.19380195299803551	0.926687748144334	2932158665733260	2.7172e+16
12489122	0.04721298264858389	0.7370918190971619	9.78_124.8912m/z	-0.2826902607752125	0.7777890224006456	0.9674578202684938	1.11738e+16	1.08102e+16
124.89122*	0.028102005897577262	0.8416787062922464	8.51_124.8912m/z	0.37925026939956064	0.7050177489256412	0.990543261385068	3390434880401860	3.35837e+16
124.89122**	0.0697913518058913	0.6194856539994056	8.42_124.8912m/z	1.48516e+16	0.13951856994958078	1.11551e+16	2.8077e+16	3132025935320750
12489458	-0.07241205536879307	0.6063611740301474	8.68_124.8946m/z	0.6556739978070215	0.5129997148419034	1.0172e+16	4.83821e+16	4.92143e+16
12495499	0.056204011795154524	0.6893547874026152	1.12_124.9550m/z	1.93334e+16	0.05500533613589945	1.23442e+16	2285780731722040	2.82161e+16
12495502	-0.08676620730670401	0.5367256094832498	4.22_124.9550m/z	0.5170746171134561	0.6058364123476611	0.9486359962306832	0.3881155535705293	0.36818038481400217
12495503	0.17244229443893536	0.21692799714366584	4.80_124.9550m/z	-3801905971889640	0.0002055545271940416	0.8412412133808369	4103256508159640	3451828483737030
12498801	-0.1363169037872435	0.3304086492541747	0.92_124.9880m/z	0.06700977195475083	0.9466597287431544	1.10738e+16	2207704849347770	2.44477e+16
12499136	0.3564156845546384	0.008805483642800538	1.23_124.9914m/z	-1.48324e+16	0.14002858344116406	0.945911385818073	4430385835355860	4190752405230220
124.99136*	0.1242213488815431	0.3754989052049637	0.89_125.9986n	-0.5017593117205293	0.6165442447192527	0.994797584535714	7.84754e+16	7806715903188310
12499142	0.013909888141555459	0.9212529701606093	10.00_124.9914m/z	-0.19618172580111304	0.8447232581082346	0.9601984562305136	5959942662929740	5722727744167520
124.99142*	0.05676847102408721	0.6863952436379155	9.80_124.9914m/z	-0.1336438032590976	0.8938564947895136	0.9520924420264778	5130597463767210	4884803068332970
12500441	-0.04531892592990945	0.7472821034834657	0.81_125.0044m/z	0.09938226551994557	0.9209623584504348	0.990724873960201	2816196473435560	2.79008e+16
125.01071*	-0.03902832382905996	0.7814261280026962	0.81_125.0107m/z	-0.5538392834010238	0.5804818257831164	0.9955456201984604	5827685165040520	5801726441951630
12501784	0.09273112301258807	0.5089841723469158	1.15_125.0178m/z	-0.3638059093177401	0.71649553057321	0.9986330568340948	3.99452e+16	3989064545729060
12502438	0.31839532363438683	0.020151861077556045	4.29_125.0244m/z	-4853854712869690	2.91386e+10	0.918196569018458	5002818659344070	4593570928431250
12502441	0.056607196958677865	0.6872403539605398	0.56_125.0244m/z	0.4879517240064458	0.626269140015004	0.9979157252195088	4144656581245990	4136017978059900
125.02441*	0.0970063503437172	0.4895596683865453	0.80_125.0244m/z	-0.8602741659731468	0.3909581069429233	1.00474e+16	3.97906e+16	3.99794e+16
12503564	0.05821993761277125	0.6788064721935096	2.95_125.0356m/z	0.5013913003624629	0.6168025718236029	0.9767976602277026	1.94351e+16	1.89842e+16
12503569	0.18171555319997235	0.19283548202309453	0.54_144.0535n	0.4475105454550339	0.6551272515347161	1010222785281860	4633692350604570	4681061592567020
12505462	-0.36351174343264936	0.007461626616530448	5.09_125.0546m/z	-0.4247510957005901	0.6716033811592123	1.00217e+16	6362920491181920	6376701074736090
12505464	0.1331720595117614	0.341791068260476	1.37_125.0546m/z	-1.64345e+16	0.10230415542804933	0.948175562796844	2.77426e+16	2630489847918810
1250608	0.09289386167577904	0.5082376658899079	4.75_125.0608m/z	-1.67655e+16	0.0956328088555827	0.9524534630858744	2.18461e+16	2080735579082320
125.0608*	0.2688438670373676	0.05158933378303932	4.29_125.0608m/z	-3.51648e+16	0.0005728624811569236	0.7839514256502501	462876258726982	3628725029286710
12506081	0.11571414193120047	0.4093142286191894	4.63_125.0608m/z	-1.79289e+16	0.0749275293384691	0.967923783742304	3688557239040050	3570242279361710
125.06081*	0.09563552078773782	0.4957455436892223	4.88_125.0608m/z	0.26673609269888443	0.7900246256139545	1.05456e+16	2.38168e+16	251163973762312
12509718	-0.23908880196934454	0.0846731643213045	5.06_125.0972m/z	0.2711107489369449	0.7866642591685925	0.8706329446497637	251897345027339	2.1931e+16
12509719	0.0974901725399452	0.4873860849358114	5.54_125.0972m/z	-1.88491e+16	0.061301842827196334	0.9731944971749814	5933925799549150	5774863934765880
12512523	-0.1037395425745571	0.4597707111545454	1.14_125.1252m/z	-0.9220505384369414	0.3579260252989845	0.9968056623911112	4900713374415040	4.88506e+16
1258732	0.06346134473857476	0.6516692502673833	0.56_125.8732m/z	-0.6598085361695304	0.5103496495449977	0.9991238942263292	7693038409499670	7.6863e+16
1259258	0.10087692791354133	0.4723136056864924	12.57_125.9258m/z	0.5896292360421288	0.5562922476860528	0.9882835730706134	8141464506260650	8046075632274850
12592888	0.19707690793021185	0.15723137933665526	0.51_125.9289m/z	-0.98121801143096	0.32800452891155485	0.9642607492124836	45100096056855	4348825241333790
12599471	0.15881463591184625	0.25602140283361297	0.89_125.9947m/z	-0.6706484879244143	0.5034361611990044	1017591554158400	3.44858e+16	3.50924e+16
12599473	0.3770250286767613	0.005388541166730225	1.22_125.9947m/z	-1.32214e+16	0.18805593694989006	0.7569290551874056	1.35163e+16	1023086755354790
12600191	-0.029996976166136988	0.8311539281062759	4.69_126.0019m/z	0.06285368261329967	0.9499634794267492	0.8747497062058097	2065499363613570	180679496148926
126.00317*	0.03253704269633408	0.8170925209747614	0.81_126.0032m/z	0.12751384608208582	0.8986979372929524	1.00537e+16	6668625703117370	6704435392246120
1260321	0.17613999134759842	0.20708107613949367	4.10_126.0321m/z	-2.59625e+16	0.010325175694414872	0.08538588198489498	188600585156806	0.16103827306481172
126039	0.04600342715801385	0.7435943418041184	3.75_126.0390m/z	-0.3680667815550944	0.713322382017131	0.9996280910697688	7526086993196690	7523287974234230
12603901	0.09882068357957226	0.4814348928825567	0.56_126.0390m/z	-0.09529257283261952	0.9242047387495724	1.00396e+16	4170277349554580	4186771442816830
12605607	0.16639451698608515	0.2337289827080267	0.56_126.0561m/z	0.29670510011989426	0.7670863305935668	1006481883193830	3.07827e+16	3.09822e+16
12688106	-0.15554883608730713	0.2660538704167172	9.75_126.8811m/z	-0.8494585266140505	0.3969279232180112	0.9988374472672392	888146614078653	8871140968053630
12690502	0.0694284851587203	0.6213123254501163	1.01_126.9050m/z	-1.10838e+16	0.2694046266764027	0.9694715444199834	5573305455026690	5403161047009040
12693589	0.15768571745398088	0.2594601617267873	1.70_126.9359m/z	-1.61368e+16	0.10861831447652627	0.9893721209160096	6967820046212700	6893766897282540
12695281	-0.06237274479706172	0.6572701833264425	1.18_126.9528m/z	-0.2011360637708084	0.8408541965016092	0.8548778707908612	3.11668e+16	266438042144637
12698595	-0.3190807384123765	0.01987026122257266	4.50_126.9859m/z	1.52852e+16	0.12840838161026985	0.9797531974520021	0.6309062969157601	0.6181324616958179
12698718	0.18885193059433555	0.17564021324783935	0.89_126.9872m/z	-0.32618840101313423	0.7447189867369194	1.00424e+16	4415063333198720	4433766453911210
1269872	0.27633643493880344	0.04517966425135782	1.23_126.9872m/z	-1.6608e+16	0.098761825009723	0.872408491027288	2129188751392870	1.85752e+16
12700368	0.13518798532937815	0.3344669470387224	0.99_127.0037m/z	-0.5524974816192484	0.5813983120467825	1.02669e+16	4106276002291650	4215885371700080
12700369	0.14893659940552426	0.287160997677408	1.38_127.0037m/z	-0.3509332903567524	0.7261118633969788	0.9898940354289371	2939340278759740	2.90964e+16
127.00369*	-0.17578873129617914	0.2080027112459375	2.14_127.0037m/z	1.11974e+16	0.2645450991559366	1.02233e+16	3307570950089030	3.38142e+16
1270037	0.1141014012771071	0.4159171036478163	1.72_127.0037m/z	-0.5802399805401047	0.5625899656963544	1.02282e+16	2.28877e+16	2.341e+16
127.0037*	0.2951718582154421	0.031896619636722204	1.54_127.0037m/z	0.324326128148533	0.7461256022833223	1.01742e+16	2718770457239030	2766138755269470
127.0037**	0.2258643286057788	0.10390733904193307	0.63_127.0037m/z	0.25090245273496603	0.8022196973652412	0.9986943516711404	3.83594e+16	3830930895640150
127.0037***	0.2357020465957485	0.08930969940004545	2.03_127.0037m/z	1.33344e+16	0.1843297304429438	1.03213e+16	3263815744347520	3.36869e+16
12700371	0.3132748720576403	0.022364388221460432	3.38_127.0037m/z	0.3654941073452006	0.7152377041173046	1.01031e+16	3.74508e+16	3783688669640230
12701491	-0.06531599649078215	0.6421708311739721	0.85_127.0149m/z	0.5573673178727006	0.5780753503193536	1023519531986070	2.87742e+16	2.9451e+16
12702628	0.08696703977198587	0.5357797278560911	0.53_128.0336n	-0.04523280739239068	0.9639795941709408	0.9958194817091044	4.92347e+16	4902887578601600
12704005	0.4971676251406387	0.00015241092043344256	1.14_127.0400m/z	-0.12759564386810904	0.8986333078911322	0.9918153283382452	4304648711541020	4269416575217860
12704008	0.3910089715849416	0.003792394354501522	4.34_127.0401m/z	-2499958505060740	0.01345483172192466	0.9234950815344624	5.23193e+16	4831662883071680
12705131	0.08019352902479364	0.5681236732300496	1.52_127.0513m/z	-0.22236354869278413	0.824321741677604	0.949074656179878	1.40385e+16	1.33236e+16
127.05131*	0.11009192815980227	0.4325945450451184	2.21_127.0513m/z	0.020637882874510127	0.9835608938832326	0.9762696146993228	1380401360840090	1.34764e+16
127.05131**	0.18675536774401416	0.1805724800575737	2.28_127.0513m/z	-2.15082e+16	0.03302999532054775	0.7911391283573217	149840268802577	1.18544e+16
12705132	0.18276383462513307	0.1902371287759341	3.54_127.0513m/z	-1.89467e+16	0.059986460789987976	0.8706047447870662	2.40307e+16	2.09212e+16
12707647	0.009031347662922969	0.9488247784356854	4.79_128.0837n	1.42245e+16	0.15689312340305467	1.02589e+16	5.03684e+16	5167256791434060
127.07647*	0.02124785811768037	0.8799637438038952	4.52_127.0765m/z	-2213959935652290	0.028282162603499	0.9792203919510944	5769759557716820	5649866215571030
12707648	0.027013405956064225	0.8477374160219808	6.18_127.0765m/z	-0.3676163648051463	0.7136575800412241	0.9953026653319952	32842954668649	3268868031908420
127.07648*	-0.1121257939758427	0.4240881751898827	5.16_127.0765m/z	-0.7065305771996273	0.4809121740808268	1.00354e+16	5051835572234050	5069729371829700
127.07648**	0.2021167224742537	0.14667623984483308	5.35_127.0765m/z	-0.08375357676091905	0.9333597375262424	0.9690975637986686	2586350056181590	2506425538576130
12707649	-0.10369922405820477	0.4599461058457626	8.37_127.0765m/z	-1.52644e+16	0.12892558612093294	0.9902942563184508	384931724971362	3.81196e+16
12711288	0.10144138714247404	0.4698259819013706	8.29_127.1129m/z	-2.36358e+16	0.01933127289127694	0.8945677010396704	2109231004102230	1.88685e+16
12787028	0.07019453696941466	0.6174586893394542	0.56_128.8776n	-0.629192620451613	0.5301432639645758	1.00006e+16	7586172046684380	758663386045628
12792402	-0.200947485500036	0.14907686705526202	12.59_127.9240m/z	0.13491377050637804	0.8928539671248981	0.9987564441793216	7977757453535030	7967836666817720
12798809	-0.3360548337967094	0.01388629343280554	1.86_127.9881m/z	-1.27393e+16	0.2045822367978476	0.9715869635322764	2260681359405100	2196448537498420
12801018	0.17752242749932953	0.2034817791555697	1.11_128.0102m/z	-1.4171e+16	0.1584471966207024	1.00431e+16	4286134443210650	4304616890648730
12801026	-0.06777542598827457	0.6296623819324386	0.53_128.0103m/z	-0.504989841423257	0.6142786207342974	1.00792e+16	4310221005480320	4344358984696670
12801289	0.07299201972070522	0.6034730985635699	0.54_107.0382n	-0.8996953858720841	0.3696690792287952	0.8387520085722929	2.68227e+16	2249757441806420
12801827	-0.15329099917157638	0.2731413898718655	0.85_128.0183m/z	-0.1763171119314919	0.8602735035449895	0.791703595342192	143376990457194	1.13512e+16
12803328	-0.035521328953959284	0.8006449775552135	1.85_128.0333m/z	-0.05213524734989057	0.9584876275367152	1.00496e+16	277832690320648	2.79211e+16
12803521	-0.2528374160454907	0.06776049694748891	1.85_128.0352m/z	-0.3377195781052121	0.7360285323070113	0.9974037410653872	1.12645e+16	1.12353e+16
12807173	0.18943166472267808	0.17429373240208693	4.22_128.0717m/z	-0.8372202524458029	0.4037495349101171	0.86550824028629	2792999564150970	2.41736e+16
12807174	0.14729541746103508	0.2925651288168613	4.03_128.0717m/z	-1.07701e+16	0.28314031392221034	0.8924012170509054	2.22762e+16	1987934446868830
1280822	-0.3779860908031375	0.005262514957386904	1.86_128.0822m/z	-0.3584855853099076	0.7204646153505339	0.9692387611803722	2.05196e+16	1988838645991150
12887813	-0.1705070056540233	0.22220991537759335	9.75_128.8781m/z	-0.4541346110559888	0.6503631516927313	1.00047e+16	9236485272785080	9240795672364510
128.93297*	0.14970265121621862	0.2846610445723359	1.70_128.9330m/z	-1.64775e+16	0.10141721130226147	0.9878299028205301	6570781434503830	6490814385900860
12893985	0.014071162206964798	0.9203428933713002	0.55_128.9399m/z	1.86249e+16	0.06441444160572955	1.13397e+16	1304867934371660	1.47968e+16
12895958	-0.15300876955711007	0.2740360551886284	0.78_128.9596m/z	0.3830128581059298	0.7022316271318841	0.9866591248545191	6891056653382	6799123926948790
12895961	0.1992541078132379	0.15260504906555208	10.70_128.9596m/z	-0.2615722319595611	0.7939962892351528	1.00079e+16	6183198185994180	6188090911016300
12901932	0.3157343015551328	0.021277365378180257	2.66_129.0193m/z	1.48941e+16	0.13839958037545058	1.02835e+16	693592653035115	7.13255e+16
12901934	0.017659510162322582	0.9001219654137083	0.94_129.0193m/z	-1.28915e+16	0.19925497145456228	0.9935190668175125	745566289944646	7407343246363990
129.01934*	0.3367402485746991	0.013681308596056005	3.33_130.0266n	0.8507492416328687	0.3962125940226981	1.00599e+16	6146728536874000	6183530789465040
12901936	0.16570910220809548	0.2356880280436825	3.43_129.0194m/z	-2.09218e+16	0.038041977281634366	0.9826456150090204	7025722971231500	6903795869948780
1290306	0.21687329945920816	0.11879714862583445	1.31_129.0306m/z	-1.85838e+16	0.06499934138134933	0.9607368409888488	434221434296752	4171725290759080
12903331	0.0973692169908882	0.4879290064067589	0.54_148.0512n	-0.3215410201101046	0.7482308490836829	0.9497206741986332	3782701057446580	3.59251e+16
12903647	0.00044350367987568135	0.9974852609753436	2.10_129.0365m/z	2.12191e+16	0.035424547388584374	1.04371e+16	3.76551e+16	3.93011e+16
12903778	0.195311341417478	0.16105810755892358	4.41_129.0378m/z	-0.2218269463909048	0.8247387249001273	0.9711560392377164	0.5584839323786026	0.5423750437467083
1290386	-0.2580385046549418	0.06211366636743852	1.85_129.0386m/z	-0.5265463366198709	0.5992565259436344	0.9942400447959626	8450835935617710	8402159499191880
12904075	0.2458672689684945	0.07596215586652116	4.85_129.0408m/z	-1.21457e+16	0.22636469110835386	0.905236355875693	2015586413993240	1824582100355800
12904141	-0.11830191277107988	0.3988468043426846	1.83_129.0414m/z	-0.09686144377131316	0.9229607569531618	0.953035176124158	1.40691e+16	1.34083e+16
12905377	0.04426973095486346	0.7529455438158378	4.50_129.0538m/z	-0.4947826150663423	0.6214496940759378	0.9105506425412639	0.8479597720825661	0.7721103153189244
12905575	0.3099284352003966	0.023918374114912055	4.85_129.0558m/z	-1.32427e+16	0.18735102174567608	1.00275e+16	1.03391e+16	1.03675e+16
129.05575*	0.352383832919405	0.009658788552132149	4.60_129.0558m/z	-1.55591e+16	0.12175620480405346	1.0004e+16	9996478468793410	1000047501658410
12909215	0.2640056450750874	0.05610715967036775	5.20_129.0921m/z	1.40945e+16	0.16069128299759974	1.09015e+16	2.85783e+16	3115471734896980
12986727	0.07676645513484523	0.5848259447674182	0.56_129.8673m/z	-0.7006916187093848	0.4845392661336195	0.9996608338720652	5419664295719540	5.41783e+16
12986728	-0.10043342423366564	0.4742730943795875	12.99_129.8673m/z	-0.30482565231102754	0.760905237742461	0.9843490828260091	3336016763485400	3.28381e+16
12987066	0.1033043688845256	0.4616657343097439	8.14_129.8707m/z	-0.20739775474697986	0.8359697235845619	0.8736625463209265	0.8753838785220807	0.7647901083178896
129.87066**	-0.1519304992345808	0.2774720361753784	8.59_129.8707m/z	-0.19474969930793526	0.8458423002116359	0.8605224465040024	0.6281604546925386	0.5405461712690899
12993637	-0.17280516108610638	0.21594747790586813	11.24_84.9382n	-0.0786649344271511	0.9373999510361009	1.00051e+16	9789404467950840	9794394985474010
12993638	0.06507408539266815	0.6434065812866722	0.51_84.9382n	-0.4348668947358633	0.6642600242164438	1.00129e+16	6877232947308540	6886129864439860
13001454	-0.3791956462937075	0.005107579158476383	0.86_130.0145m/z	-2.47305e+16	0.014468919271777524	0.9102305701514228	3.55415e+16	3.23509e+16
13002258	-0.00250257464201488	0.985810691907914	2.49_130.0226m/z	1.48868e+16	0.13858949784474098	1.06076e+16	0.2792234748701746	0.2961892990111664
13002267	0.31444410903185804	0.021841904119857064	4.36_130.0227m/z	-1.47087e+16	0.14334049312567151	1.03415e+16	1583097670954910	1.63716e+16
13004108	0.2657796597945901	0.054414888820814335	11.45_130.0411m/z	-1.00856e+16	0.31474684516285817	0.9893118987374412	4.67781e+16	4627815053677710
130.04108*	-0.12204414899851705	0.3839894308200485	12.94_130.0411m/z	0.4221416783193484	0.6735028162545127	0.9648751149860936	1.93094e+16	1.86312e+16
130.04108**	0.06370325583668877	0.6504271699875199	11.78_130.0411m/z	-0.25508628609657674	0.7989924431452003	0.9959338762212492	4.48024e+16	446201907709219
130.04108***	0.06922689257695863	0.6223281232063888	11.58_130.0411m/z	0.18692397685646708	0.8519631181830992	1.00699e+16	3858450328123810	3885402330155670
13004109	0.16873299093452054	0.22712958083233534	11.20_130.0411m/z	-1.46551e+16	0.14479528822899426	0.9783962493731878	5.08394e+16	4.9741e+16
130.04109*	0.2844068143493687	0.039019890202129946	12.70_130.0411m/z	-0.8000434614480959	0.4249022353436398	0.9953322893568102	5976085262162750	5948190625379940
1300411	0.26727144489962645	0.053024032340097615	10.86_130.0411m/z	-1638166377232120	0.10340240818132893	0.9459639569024776	3.56446e+16	3.37185e+16
13004112	-0.011571414193120048	0.934459746116485	0.54_131.0484n	-0.17476435551458794	0.8614914097676558	1003890782622420	4892616435672860	4.91165e+16
13005088	-0.1087390386022466	0.4383054827819413	1.88_130.0509m/z	-3.65263e+16	0.0003539037971114702	0.968680594619396	6280888847141400	6084175143187270
1300509	0.1606692876640536	0.2504389683351164	2.14_130.0509m/z	-2371450473990210	0.018938835140587026	0.9904955014570892	7143991193953870	7076091140060370
13006188	0.18486461694490905	0.18510546551260396	4.85_130.0619m/z	-1462932506925930	0.14549768932183174	0.5672340410712121	1.37049e+16	0.7773894380458393
1300619	-0.04068138299950568	0.7724110790040154	4.72_130.0619m/z	-0.5751733661551012	0.5660027053988229	0.7439196121602408	0.502837298530001	0.3740705281021416
13006215	-0.2745289923661495	0.04666289450003065	1.10_130.0621m/z	1179181899307130	0.2401210372419785	0.0	0.016521002178686378	0.0
130.06215*	-0.11889930472303492	0.39645279030084224	0.94_130.0621m/z	-0.4807867353408035	0.6313416759795059	0.9870924278770636	7241273385054080	7147806126574590
1300662	0.3166468418618967	0.02088555901926045	3.99_130.0662m/z	-0.09311509333206748	0.9259316051125672	0.9204748889274484	0.568393469319643	0.5231919155390854
13006625	0.15927676673210833	0.2546226248875289	7.19_130.0662m/z	-3.44642e+16	0.0007301350621305631	0.6122320544827484	1.69415e+16	1.03721e+16
13008726	0.33311158210298897	0.014796692892991018	2.08_130.0873m/z	-2.29445e+16	0.02309804053291964	0.9779018840145468	7437197857774010	7272849796906160
13008731	0.1380505999903939	0.32423675238269634	2.39_130.0873m/z	-0.7489190691694237	0.455033725328387	0.9903029871695636	7122910971588380	7053840012506830
[truncated: 14,083 more rows]
